# Supplementary material
Source: PubMed Central journal article supplement (PMC6298436)
Supplement: NIHMS1507910-supplement-Supplementary_Table_1.pdf [file NIHMS1507910-supplement-Supplementary_Table_1.pdf]

Supplementary Table 1: List of the differential expressed genes (DE) regulated by EPA in BAT (P<0.05, fold change>2, RPKM>0.3).  
 Transcriptomic and MicroRNA Analyses of Gene Networks Regulated by Eicosapentaenoic Acid in Brown Adipose Tissue of Diet-Induced Obese Mice  
 Mandana Pahlavani, Nadeeja N. Wijayatunga, Nishan S. Kalupahana, Latha Ramalingam, Preethi H. Gunaratne, Cristian Coarfa, Kimal Rajapakshe, Pratibha Kottapalli, and Naima Moustaid-Moussa. BBA Cell Mol Lipids

|    | Gene Symbol | RPKM HF | RPKM HF-EPA | Fold change | P value | Gene Name                                                                               | Protein Name                                                                            | Uniport ID                                                                         |
|----|-------------|---------|-------------|-------------|---------|-----------------------------------------------------------------------------------------|-----------------------------------------------------------------------------------------|------------------------------------------------------------------------------------|
| 1  | Cyp2e1      | 2.71    | 19.13       | 7.06        | 0.00    | cytochrome P450, family 2, subfamily e, polypeptide 1 [Source:MGI Symbol;Acc:MGI:88607] | cytochrome P450, family 2, subfamily e, polypeptide 1 [Source:MGI Symbol;Acc:MGI:88607] | Q05421;A0A1B0GSV7;Q0PGA0;Q0PGA1                                                    |
| 2  | Cish        | 19.16   | 66.55       | 3.47        | 0.00    | cytokine inducible SH2-containing protein [Source:MGI Symbol;Acc:MGI:103159]            | cytokine inducible SH2-containing protein [Source:MGI Symbol;Acc:MGI:103159]            | Q62225;E9Q273;E9Q2F4;Q3TD28;Q3TDM7;Q8C3F4                                          |
| 3  | Mt-ts1      | 22.34   | 65.54       | 2.93        | 0.01    | Mitochondrially Encoded TRNA Serine 1 (UCN) MGI:102475                                  | Mitochondrially Encoded TRNA Serine 1 (UCN) MGI:102475                                  |                                                                                    |
| 4  | Vnn3        | 0.32    | 0.86        | 2.72        | 0.03    | vanin 3 [Source:MGI Symbol;Acc:MGI:1347055]                                             | vanin 3 [Source:MGI Symbol;Acc:MGI:1347055]                                             | Q9QZ25;Q2T9H5                                                                      |
| 5  | Ccdc18      | 0.55    | 1.49        | 2.72        | 0.00    | coiled-coil domain containing 18 [Source:MGI Symbol;Acc:MGI:1922974]                    | coiled-coil domain containing 18 [Source:MGI Symbol;Acc:MGI:1922974]                    | Q640L5                                                                             |
| 6  | Cfd         | 279.45  | 746.38      | 2.67        | 0.00    | complement factor D (adipsin) [Source:MGI Symbol;Acc:MGI:87931]                         | complement factor D (adipsin) [Source:MGI Symbol;Acc:MGI:87931]                         | P03953;B7ZNS9;Q3UP47;Q9Z1T6;A0A087WQI1;A0A087WS78;D3Z5N5;Q3TR41                    |
| 7  | Gm454       | 1.19    | 3.01        | 2.54        | 0.02    | predicted gene 454 [Source:MGI Symbol;Acc:MGI:2685300]                                  | predicted gene 454 [Source:MGI Symbol;Acc:MGI:2685300]                                  |                                                                                    |
| 8  | Wrb         | 0.64    | 1.55        | 2.44        | 0.00    | tryptophan rich basic protein [Source:MGI Symbol;Acc:MGI:2136882]                       | tryptophan rich basic protein [Source:MGI Symbol;Acc:MGI:2136882]                       | Q8K0D7;D3Z1B0                                                                      |
| 9  | Resf1       | 2.43    | 5.86        | 2.41        | 0.00    | retroelement silencing factor 1 MGI:1914496                                             | retroelement silencing factor 1 MGI:1914496                                             | Q5DTW7;A0A087WP47;A0A087WP74;A0A087WR65;A0A140T8R9;A0A140T8W0;B2KFD0;B2KFD2;Q8CFR7 |
| 10 | Igkc        | 4.07    | 9.66        | 2.38        | 0.00    | immunoglobulin kappa constant [Source:MGI Symbol;Acc:MGI:96495]                         | immunoglobulin kappa constant [Source:MGI Symbol;Acc:MGI:96495]                         | A2NHM3;A2P1G9                                                                      |
| 11 | Eci3        | 5.63    | 13.15       | 2.34        | 0.00    | enoyl-Coenzyme A delta isomerase 3 [Source:MGI Symbol;Acc:MGI:1916373]                  | enoyl-Coenzyme A delta isomerase 3 [Source:MGI Symbol;Acc:MGI:1916373]                  | Q78JN3;E9PY42                                                                      |
| 12 | Gm14085     | 0.38    | 0.88        | 2.32        | 0.03    | predicted gene 14085 [Source:MGI Symbol;Acc:MGI:3702173]                                | predicted gene 14085 [Source:MGI Symbol;Acc:MGI:3702173]                                | A2AWR5                                                                             |
| 13 | Gm7160      | 2.22    | 5.14        | 2.32        | 0.01    | predicted gene 7160 [Source:MGI Symbol;Acc:MGI:3646078]                                 | predicted gene 7160 [Source:MGI Symbol;Acc:MGI:3646078]                                 |                                                                                    |

|    |                |      |       |      |      |                                                                                   |                                                                                   |                                                                                   |
|----|----------------|------|-------|------|------|-----------------------------------------------------------------------------------|-----------------------------------------------------------------------------------|-----------------------------------------------------------------------------------|
| 14 | <b>Evi2b</b>   | 0.40 | 0.92  | 2.30 | 0.04 | ecotropic viral integration site 2 [Source:MGI Symbol;Acc:MGI:5439444]            | ecotropic viral integration site 2b [Source:MGI Symbol;Acc:MGI:1890682]           |                                                                                   |
| 15 | <b>Gm21975</b> | 0.40 | 0.92  | 2.30 | 0.04 | N/A                                                                               | N/A                                                                               |                                                                                   |
| 16 | <b>Gm36028</b> | 0.73 | 1.67  | 2.30 | 0.00 | predicted gene, 36028 [Source:MGI Symbol;Acc:MGI:5595187]                         | predicted gene, 36028 [Source:MGI Symbol;Acc:MGI:5595187]                         | A0A0U1RPM1                                                                        |
| 17 | <b>Fam131c</b> | 1.41 | 3.21  | 2.28 | 0.05 | family with sequence similarity 131, member C [Source:MGI Symbol;Acc:MGI:2685539] | family with sequence similarity 131, member C [Source:MGI Symbol;Acc:MGI:2685539] | A2ADB2                                                                            |
| 18 | <b>Efcab2</b>  | 1.38 | 3.06  | 2.21 | 0.00 | EF-hand calcium binding domain 2 [Source:MGI Symbol;Acc:MGI:1915476]              | EF-hand calcium binding domain 2 [Source:MGI Symbol;Acc:MGI:1915476]              | Q9CQ46                                                                            |
| 19 | <b>Igfals</b>  | 1.01 | 2.18  | 2.17 | 0.00 | Insulin Like Growth Factor Binding Protein Acid Labile Subunit MGI:107973         | Insulin Like Growth Factor Binding Protein Acid Labile Subunit MGI:107973         | P70389;A0A0R4J0S2;Q3KQP3;Q570Z9;Q791Q5                                            |
| 20 | <b>Zfp54</b>   | 0.84 | 1.81  | 2.16 | 0.04 | zinc finger protein 54 [Source:MGI Symbol;Acc:MGI:99201]                          | zinc finger protein 54 [Source:MGI Symbol;Acc:MGI:99201]                          | E9PW05;E9Q520;O88631;Q60917;Q66JT2;Q9QWM9                                         |
| 21 | <b>Klhl6</b>   | 0.65 | 1.39  | 2.14 | 0.01 | kelch-like 6 [Source:MGI Symbol;Acc:MGI:2686922]                                  | kelch-like 6 [Source:MGI Symbol;Acc:MGI:2686922]                                  | Q8BUL5;A0A0G2JF30;G3UW75;Q8K2Z1;Q6V595;E9QAK3;F6T3Y1                              |
| 22 | <b>Pard6g</b>  | 0.33 | 0.70  | 2.13 | 0.03 | par-6 family cell polarity regulator gamma [Source:MGI Symbol;Acc:MGI:2135606]    | par-6 family cell polarity regulator gamma [Source:MGI Symbol;Acc:MGI:2135606]    | Q9JK84;Q8CBL3;Q8CFJ8                                                              |
| 23 | <b>Sgk2</b>    | 0.50 | 1.05  | 2.11 | 0.00 | serum/glucocorticoid regulated kinase 2 [Source:MGI Symbol;Acc:MGI:1351318]       | serum/glucocorticoid regulated kinase 2 [Source:MGI Symbol;Acc:MGI:1351318]       | Q9QZS5;Q3UW73;Q9ERE3;A0A087WPW2;A0A087WQS1;A0A087WR70;Q3U907;Q3U9B2;Q3U9H2;Q8VEK1 |
| 24 | <b>Pon1</b>    | 8.43 | 17.80 | 2.11 | 0.00 | paraoxonase 1 [Source:MGI Symbol;Acc:MGI:103295]                                  | paraoxonase 1 [Source:MGI Symbol;Acc:MGI:103295]                                  | P52430;H3BK03;H3BLB8;Q62086;Q8VDG8                                                |
| 25 | <b>Rpl41</b>   | 5.48 | 11.49 | 2.10 | 0.01 | ribosomal protein L41 [Source:MGI Symbol;Acc:MGI:1915195]                         | ribosomal protein L41 [Source:MGI Symbol;Acc:MGI:1915195]                         | P62947;H3BK91                                                                     |
| 26 | <b>Ociad2</b>  | 2.56 | 5.31  | 2.08 | 0.01 | OCIA domain containing 2 [Source:MGI Symbol;Acc:MGI:1916377]                      | OCIA domain containing 2 [Source:MGI Symbol;Acc:MGI:1916377]                      | Q9D8W7;A0A0J9YU34;A0A0J9YU56;A0A0J9YU93;A0A0J9YUI7                                |

|    |                |       |       |      |      |                                                                                                                      |                                                                                                                      |                                                                                                                                                                |
|----|----------------|-------|-------|------|------|----------------------------------------------------------------------------------------------------------------------|----------------------------------------------------------------------------------------------------------------------|----------------------------------------------------------------------------------------------------------------------------------------------------------------|
| 27 | <b>Rasl2-9</b> | 1.90  | 3.89  | 2.05 | 0.00 | RAS-like, family 2, locus 9<br>[Source:MGI<br>Symbol;Acc:MGI:104605]                                                 | RAS-like, family 2, locus 9<br>[Source:MGI<br>Symbol;Acc:MGI:104605]                                                 | Q61820;A6H622                                                                                                                                                  |
| 28 | <b>Sycp2</b>   | 0.41  | 0.83  | 2.03 | 0.01 | synaptonemal complex protein 2<br>[Source:MGI<br>Symbol;Acc:MGI:1933281]                                             | synaptonemal complex protein 2<br>[Source:MGI<br>Symbol;Acc:MGI:1933281]                                             | Q9CUU3;A2AJW3;Q8CDQ4                                                                                                                                           |
| 29 | <b>Nabp1</b>   | 13.28 | 26.90 | 2.03 | 0.00 | nucleic acid binding protein 1<br>[Source:MGI<br>Symbol;Acc:MGI:1923258]                                             | nucleic acid binding protein 1<br>[Source:MGI<br>Symbol;Acc:MGI:1923258]                                             | Q8BGW5;Q3TJ87;Q8R2P2                                                                                                                                           |
| 30 | <b>Eri2</b>    | 7.88  | 15.83 | 2.01 | 0.00 | exoribonuclease 2 [Source:MGI<br>Symbol;Acc:MGI:1918401]                                                             | exoribonuclease 2 [Source:MGI<br>Symbol;Acc:MGI:1918401]                                                             | Q5BKS4;D3YW28;D6RE53;F8WH13;Q6ZPP5;Q9D405                                                                                                                      |
| 31 | <b>Etnk1</b>   | 2.55  | 1.28  | 0.50 | 0.00 | ethanolamine kinase 1<br>[Source:MGI<br>Symbol;Acc:MGI:1922570]                                                      | ethanolamine kinase 1<br>[Source:MGI<br>Symbol;Acc:MGI:1922570]                                                      | Q9D4V0;A0A0N4SV10;A0A0N4SVC4;Q8BWV4;Q8BZY0                                                                                                                     |
| 32 | <b>Tnrc6c</b>  | 3.92  | 1.96  | 0.50 | 0.01 | trinucleotide repeat containing 6C<br>[Source:MGI<br>Symbol;Acc:MGI:2443265]                                         | trinucleotide repeat containing 6C<br>[Source:MGI<br>Symbol;Acc:MGI:2443265]                                         | Q3UHC0;B1ATC3;B7ZC94                                                                                                                                           |
| 33 | <b>Rnf144a</b> | 5.70  | 2.84  | 0.50 | 0.00 | ring finger protein 144A<br>[Source:MGI<br>Symbol;Acc:MGI:1344401]                                                   | ring finger protein 144A<br>[Source:MGI<br>Symbol;Acc:MGI:1344401]                                                   | Q925F3;A0A1Y7VMM6                                                                                                                                              |
| 34 | <b>Phf2</b>    | 6.89  | 3.44  | 0.50 | 0.01 | PHD finger protein 2<br>[Source:MGI<br>Symbol;Acc:MGI:1338034]                                                       | PHD finger protein 2<br>[Source:MGI<br>Symbol;Acc:MGI:1338034]                                                       | Q9Z1B8;Q9WTU0;Q3UYU8                                                                                                                                           |
| 35 | <b>Mbnl1</b>   | 4.01  | 2.00  | 0.50 | 0.00 | muscleblind like splicing factor 1<br>[Source:MGI<br>Symbol;Acc:MGI:1928482]                                         | muscleblind like splicing factor 1<br>[Source:MGI<br>Symbol;Acc:MGI:1928482]                                         | Q9JKP5;A0A0A6YVV8;A0A0A6YWB0;A0A0A6YWG1;A0A0A6YWJ5;A0A0A6YX59;A0A0A6YXE3;A0A0A6YXG7;A0A0A6YXL7;A0A0A6YXP3;A0A0A6YXQ4;G3X9Q0;Q3U570;Q3U581;Q4VA08;Q8CAQ1;Q8CHF5 |
| 36 | <b>Cmip</b>    | 4.42  | 2.20  | 0.50 | 0.00 | c-Maf inducing protein<br>[Source:MGI<br>Symbol;Acc:MGI:1921690]                                                     | c-Maf inducing protein<br>[Source:MGI<br>Symbol;Acc:MGI:1921690]                                                     | Q9D486;B2RY70                                                                                                                                                  |
| 37 | <b>Nod2</b>    | 0.83  | 0.42  | 0.50 | 0.02 | nucleotide-binding oligomerization domain containing 2<br>[Source:MGI<br>Symbol;Acc:MGI:2429397]                     | nucleotide-binding oligomerization domain containing 2<br>[Source:MGI<br>Symbol;Acc:MGI:2429397]                     | Q8K3Z0;Q2PZA2;Q2PZA3;Q3V2V4;Q3V2V8;Q80SY7;Q80SY9                                                                                                               |
| 38 | <b>Mical3</b>  | 10.95 | 5.46  | 0.50 | 0.01 | microtubule associated monooxygenase, calponin and LIM domain containing 3<br>[Source:MGI<br>Symbol;Acc:MGI:2442733] | microtubule associated monooxygenase, calponin and LIM domain containing 3<br>[Source:MGI<br>Symbol;Acc:MGI:2442733] | Q8CJ19;A0A0N4SUZ1;A0A0N4SV64;A0A0N4SVV2;A0A0N4SWA5;A0A140LID8;A0A140LJA5;A0A1D5RM34;A0A1D5RME9;Q5CZW8                                                          |

|    |                |       |       |      |      |                                                                                     |                                                                                     |                                                                                                                                           |
|----|----------------|-------|-------|------|------|-------------------------------------------------------------------------------------|-------------------------------------------------------------------------------------|-------------------------------------------------------------------------------------------------------------------------------------------|
| 39 | <b>Klf2</b>    | 40.91 | 20.39 | 0.50 | 0.00 | Kruppel-like factor 2 (lung)<br>[Source:MGI<br>Symbol;Acc:MGI:1342772]              | Kruppel-like factor 2 (lung)<br>[Source:MGI<br>Symbol;Acc:MGI:1342772]              | Q60843;Q3V293                                                                                                                             |
| 40 | <b>Trim44</b>  | 13.29 | 6.62  | 0.50 | 0.00 | tripartite motif-containing 44<br>[Source:MGI<br>Symbol;Acc:MGI:1931835]            | tripartite motif-containing 44<br>[Source:MGI<br>Symbol;Acc:MGI:1931835]            | Q9QXA7;A2AGP1;F7B7X2;Q4KMS1                                                                                                               |
| 41 | <b>Tnpo1</b>   | 3.89  | 1.94  | 0.50 | 0.00 | transportin 1 [Source:MGI<br>Symbol;Acc:MGI:2681523]                                | transportin 1 [Source:MGI<br>Symbol;Acc:MGI:2681523]                                | Q8BFY9;J3QMX2;Q3TKD0;Q3TQW0;Q3TS78                                                                                                        |
| 42 | <b>Tsc22d2</b> | 2.64  | 1.32  | 0.50 | 0.00 | TSC22 domain family, member<br>2 [Source:MGI<br>Symbol;Acc:MGI:1919283]             | TSC22 domain family, member<br>2 [Source:MGI<br>Symbol;Acc:MGI:1919283]             | A0A0G2JFL0;A0A0G2JFZ4;A7LCN1;E9Q7M2;Q148S0;Q3U1C5;Q3<br>V1I7;Q6PE86;Q9CVK3                                                                |
| 43 | <b>Cdk12</b>   | 4.02  | 2.00  | 0.50 | 0.00 | cyclin-dependent kinase 12<br>[Source:MGI<br>Symbol;Acc:MGI:1098802]                | cyclin-dependent kinase 12<br>[Source:MGI<br>Symbol;Acc:MGI:1098802]                | Q14AX6;Q3TNY6;Q9CVL4                                                                                                                      |
| 44 | <b>Spred2</b>  | 3.49  | 1.73  | 0.50 | 0.03 | sprouty-related, EVH1 domain<br>containing 2 [Source:MGI<br>Symbol;Acc:MGI:2150019] | sprouty-related, EVH1 domain<br>containing 2 [Source:MGI<br>Symbol;Acc:MGI:2150019] | Q924S7;Q5SRF8;Q5SRF9;Q8K2N1                                                                                                               |
| 45 | <b>Clic5</b>   | 12.65 | 6.27  | 0.50 | 0.04 | chloride intracellular channel 5<br>[Source:MGI<br>Symbol;Acc:MGI:1917912]          | chloride intracellular channel 5<br>[Source:MGI<br>Symbol;Acc:MGI:1917912]          | Q9QYB1;Q3U8I1;Q543N5;Q8B XK9;Q9CYD1                                                                                                       |
| 46 | <b>Trak1</b>   | 16.88 | 8.37  | 0.50 | 0.00 | trafficking protein, kinesin<br>binding 1 [Source:MGI<br>Symbol;Acc:MGI:1914345]    | trafficking protein, kinesin<br>binding 1 [Source:MGI<br>Symbol;Acc:MGI:1914345]    | Q6PD31;A0A1B0GRL4;A0A1B0GRP1;A0A1B0GRQ7;A0A1B0GRS7;<br>A0A1B0GS60;A0A1B0GSC9;A0A1B0GSP3;A0A1B0GSQ2;A2VDH1;<br>Q3TM26;Q63ZV1;Q80VE1;Q8BWK8 |
| 47 | <b>Kdm8</b>    | 0.85  | 0.42  | 0.50 | 0.01 | lysine (K)-specific demethylase<br>8 [Source:MGI<br>Symbol;Acc:MGI:1924285]         | lysine (K)-specific demethylase 8<br>[Source:MGI<br>Symbol;Acc:MGI:1924285]         | Q9CXT6;D3YUV8                                                                                                                             |
| 48 | <b>Fzd8</b>    | 2.26  | 1.12  | 0.50 | 0.02 | frizzled class receptor 8<br>[Source:MGI<br>Symbol;Acc:MGI:108460]                  | frizzled class receptor 8<br>[Source:MGI<br>Symbol;Acc:MGI:108460]                  | Q61091                                                                                                                                    |
| 49 | <b>Shtn 1</b>  | 6.45  | 3.20  | 0.50 | 0.01 | Shootin 1 MGI:1918903                                                               | Shootin 1 MGI:1918903                                                               |                                                                                                                                           |
| 50 | <b>Rtn4rl1</b> | 1.43  | 0.71  | 0.50 | 0.00 | reticulon 4 receptor-like 1<br>[Source:MGI<br>Symbol;Acc:MGI:2661375]               | reticulon 4 receptor-like 1<br>[Source:MGI<br>Symbol;Acc:MGI:2661375]               | Q8K0S5                                                                                                                                    |
| 51 | <b>Col5a1</b>  | 3.80  | 1.88  | 0.49 | 0.00 | collagen, type V, alpha 1<br>[Source:MGI<br>Symbol;Acc:MGI:88457]                   | collagen, type V, alpha 1<br>[Source:MGI<br>Symbol;Acc:MGI:88457]                   | O88207;A3KGE7;B1AWB9                                                                                                                      |

|    |                     |       |       |      |      |                                                                                              |                                                                                              |                                                  |
|----|---------------------|-------|-------|------|------|----------------------------------------------------------------------------------------------|----------------------------------------------------------------------------------------------|--------------------------------------------------|
| 52 | <b>Slc22a23</b>     | 2.35  | 1.16  | 0.49 | 0.01 | solute carrier family 22, member 23 [Source:MGI Symbol;Acc:MGI:1920352]                      | solute carrier family 22, member 23 [Source:MGI Symbol;Acc:MGI:1920352]                      | Q3UHH2;F7AWS1;F7BP73                             |
| 53 | <b>Zbtb4</b>        | 7.35  | 3.64  | 0.49 | 0.01 | zinc finger and BTB domain containing 4 [Source:MGI Symbol;Acc:MGI:1922830]                  | zinc finger and BTB domain containing 4 [Source:MGI Symbol;Acc:MGI:1922830]                  | Q5F293;B0QZJ2;B0QZJ3;Q14DI5;Q5F295;Q5F296;Q9D774 |
| 54 | <b>Gm5486</b>       | 2.19  | 1.08  | 0.49 | 0.00 | predicted gene 5486 [Source:MGI Symbol;Acc:MGI:3647871]                                      | predicted gene 5486 [Source:MGI Symbol;Acc:MGI:3647871]                                      | Q3USZ0                                           |
| 55 | <b>Notch1</b>       | 9.43  | 4.66  | 0.49 | 0.01 | notch 1 [Source:MGI Symbol;Acc:MGI:97363]                                                    | notch 1 [Source:MGI Symbol;Acc:MGI:97363]                                                    | Q01705;A2AIX5;Q8BY39                             |
| 56 | <b>D17Wsu92e</b>    | 25.97 | 12.82 | 0.49 | 0.01 | DNA segment, Chr 17, Wayne State University 92, expressed [Source:MGI Symbol;Acc:MGI:106281] | DNA segment, Chr 17, Wayne State University 92, expressed [Source:MGI Symbol;Acc:MGI:106281] | Q3TT38;B2KF52;B2KF54                             |
| 57 | <b>Gm4466</b>       | 1.26  | 0.62  | 0.49 | 0.01 | predicted gene 4466 [Source:MGI Symbol;Acc:MGI:3782650]                                      | predicted gene 4466 [Source:MGI Symbol;Acc:MGI:3782650]                                      |                                                  |
| 58 | <b>Ube2h</b>        | 16.33 | 8.06  | 0.49 | 0.02 | ubiquitin-conjugating enzyme E2H [Source:MGI Symbol;Acc:MGI:104632]                          | ubiquitin-conjugating enzyme E2H [Source:MGI Symbol;Acc:MGI:104632]                          | P62257;E9Q3U1;Q3TTE3;Q3V2N4                      |
| 59 | <b>Map3k1</b>       | 3.30  | 1.63  | 0.49 | 0.00 | mitogen-activated protein kinase kinase kinase 1 [Source:MGI Symbol;Acc:MGI:1346872]         | mitogen-activated protein kinase kinase kinase 1 [Source:MGI Symbol;Acc:MGI:1346872]         | P53349;D3YVX9;F8VQ72                             |
| 60 | <b>Limd1</b>        | 3.42  | 1.69  | 0.49 | 0.00 | LIM domains containing 1 [Source:MGI Symbol;Acc:MGI:1352502]                                 | LIM domains containing 1 [Source:MGI Symbol;Acc:MGI:1352502]                                 | Q9QXD8;A0A1L1SUR8;Q8VEE1;Q3TVW6;Q8BVZ6           |
| 61 | <b>Iqce</b>         | 2.65  | 1.31  | 0.49 | 0.00 | IQ motif containing E [Source:MGI Symbol;Acc:MGI:1921489]                                    | IQ motif containing E [Source:MGI Symbol;Acc:MGI:1921489]                                    |                                                  |
| 62 | <b>Gm29681</b>      | 4.55  | 2.24  | 0.49 | 0.00 | predicted gene, 29681 [Source:MGI Symbol;Acc:MGI:5588840]                                    | predicted gene, 29681 [Source:MGI Symbol;Acc:MGI:5588840]                                    |                                                  |
| 63 | <b>Jund</b>         | 64.85 | 31.95 | 0.49 | 0.00 | jun D proto-oncogene [Source:MGI Symbol;Acc:MGI:96648]                                       | jun D proto-oncogene [Source:MGI Symbol;Acc:MGI:96648]                                       | P15066;Q52L49                                    |
| 64 | <b>LOC102631730</b> | 11.34 | 5.58  | 0.49 | 0.00 | N/A                                                                                          | N/A                                                                                          |                                                  |

|    |                  |       |       |      |      |                                                                                                 |                                                                                                 |                                                                                     |
|----|------------------|-------|-------|------|------|-------------------------------------------------------------------------------------------------|-------------------------------------------------------------------------------------------------|-------------------------------------------------------------------------------------|
| 65 | <b>Fbxl18</b>    | 2.17  | 1.07  | 0.49 | 0.03 | F-box and leucine-rich repeat protein 18 [Source:MGI Symbol;Acc:MGI:2444450]                    | F-box and leucine-rich repeat protein 18 [Source:MGI Symbol;Acc:MGI:2444450]                    | A4VCH8;E9PYR1;F8VQK6;Q14BU8;Q3U4A0                                                  |
| 66 | <b>Ash1l</b>     | 2.84  | 1.40  | 0.49 | 0.00 | ash1 (absent, small, or homeotic)-like (Drosophila) [Source:MGI Symbol;Acc:MGI:2183158]         | ash1 (absent, small, or homeotic)-like (Drosophila) [Source:MGI Symbol;Acc:MGI:2183158]         | Q99MY8                                                                              |
| 67 | <b>Ntng2</b>     | 7.73  | 3.79  | 0.49 | 0.00 | netrin G2 [Source:MGI Symbol;Acc:MGI:2159341]                                                   | netrin G2 [Source:MGI Symbol;Acc:MGI:2159341]                                                   | Q8R4F1;A2AKW8;A2AKX2;J3QNA0;V9GX85                                                  |
| 68 | <b>Zfp385a</b>   | 4.11  | 2.02  | 0.49 | 0.02 | zinc finger protein 385A [Source:MGI Symbol;Acc:MGI:1352495]                                    | zinc finger protein 385A [Source:MGI Symbol;Acc:MGI:1352495]                                    | Q8VD12;A0A2R8VHX5                                                                   |
| 69 | <b>Gse1</b>      | 7.45  | 3.65  | 0.49 | 0.04 | genetic suppressor element 1, coiled-coil protein [Source:MGI Symbol;Acc:MGI:1098275]           | genetic suppressor element 1, coiled-coil protein [Source:MGI Symbol;Acc:MGI:1098275]           | Q3U3C9;M0QWG1                                                                       |
| 70 | <b>Peak1</b>     | 2.19  | 1.07  | 0.49 | 0.01 | pseudopodium-enriched atypical kinase 1 [Source:MGI Symbol;Acc:MGI:2442366]                     | pseudopodium-enriched atypical kinase 1 [Source:MGI Symbol;Acc:MGI:2442366]                     | Q69Z38;A0A087WQ01;A0A087WQ82                                                        |
| 71 | <b>Rbm14</b>     | 4.52  | 2.21  | 0.49 | 0.00 | RNA binding motif protein 14 [Source:MGI Symbol;Acc:MGI:1929092]                                | RNA binding motif protein 14 [Source:MGI Symbol;Acc:MGI:1929092]                                | Q8C2Q3;E9QL13;J3QPT3;Q3U6A2                                                         |
| 72 | <b>Rhob</b>      | 88.85 | 43.48 | 0.49 | 0.00 | ras homolog family member B [Source:MGI Symbol;Acc:MGI:107949]                                  | ras homolog family member B [Source:MGI Symbol;Acc:MGI:107949]                                  | P62746;Q3TIC2;Q4FJM5                                                                |
| 73 | <b>Serpinb6b</b> | 1.90  | 0.93  | 0.49 | 0.01 | serine (or cysteine) peptidase inhibitor, clade B, member 6b [Source:MGI Symbol;Acc:MGI:894688] | serine (or cysteine) peptidase inhibitor, clade B, member 6b [Source:MGI Symbol;Acc:MGI:894688] | A0A1Y7VLD5;F7B9A0;O08804;Q3TAM4                                                     |
| 74 | <b>Muc6</b>      | 1.33  | 0.65  | 0.49 | 0.00 | mucin 6, gastric [Source:MGI Symbol;Acc:MGI:2663233]                                            | mucin 6, gastric [Source:MGI Symbol;Acc:MGI:2663233]                                            | A0A087WR59;F8WIM6;O88714;Q0VAV1                                                     |
| 75 | <b>Rap2b</b>     | 2.07  | 1.01  | 0.49 | 0.00 | RAP2B, member of RAS oncogene family [Source:MGI Symbol;Acc:MGI:1921262]                        | RAP2B, member of RAS oncogene family [Source:MGI Symbol;Acc:MGI:1921262]                        | P61226;Q6ZWR0                                                                       |
| 76 | <b>Klf6</b>      | 8.35  | 4.07  | 0.49 | 0.00 | Kruppel-like factor 6 [Source:MGI Symbol;Acc:MGI:1346318]                                       | Kruppel-like factor 6 [Source:MGI Symbol;Acc:MGI:1346318]                                       | O08584;A0A1Y7VLA9;Q3U9J1;Q3UGJ1;Q8BPQ2;Q8VDZ7                                       |
| 77 | <b>Tead1</b>     | 1.31  | 0.64  | 0.49 | 0.03 | TEA domain family member 1 [Source:MGI Symbol;Acc:MGI:101876]                                   | TEA domain family member 1 [Source:MGI Symbol;Acc:MGI:101876]                                   | P30051;E9PVJ5;E9PVS2;E9PZ73;E9Q387;E9QAK6;F6QH05;Q3UFP5;Q3USK5;Q6PAQ8;Q80W05;Q8BR79 |

|    |                 |       |      |      |      |                                                                                                              |                                                                                                              |                                                                                                                                                                                                                                                                                                                                               |
|----|-----------------|-------|------|------|------|--------------------------------------------------------------------------------------------------------------|--------------------------------------------------------------------------------------------------------------|-----------------------------------------------------------------------------------------------------------------------------------------------------------------------------------------------------------------------------------------------------------------------------------------------------------------------------------------------|
| 78 | <b>Snx29</b>    | 1.12  | 0.55 | 0.49 | 0.01 | sorting nexin 29 [Source:MGI Symbol;Acc:MGI:1921728]                                                         | sorting nexin 29 [Source:MGI Symbol;Acc:MGI:1921728]                                                         | Q9D3S3;A0A0R4J1U3;D3YZ90;E9Q6P3;Q3TS66                                                                                                                                                                                                                                                                                                        |
| 79 | <b>Nfatc1</b>   | 3.41  | 1.66 | 0.49 | 0.01 | nuclear factor of activated T cells, cytoplasmic, calcineurin dependent 1 [Source:MGI Symbol;Acc:MGI:102469] | nuclear factor of activated T cells, cytoplasmic, calcineurin dependent 1 [Source:MGI Symbol;Acc:MGI:102469] | O88942;B5B2N2;B5B2N4;B5B2N5;B5B2N7;Q3UME0;Q6P7T9;Q9DBQ6;Q9JHD3                                                                                                                                                                                                                                                                                |
| 80 | <b>Lbh</b>      | 9.31  | 4.53 | 0.49 | 0.03 | limb-bud and heart [Source:MGI Symbol;Acc:MGI:1925139]                                                       | limb-bud and heart [Source:MGI Symbol;Acc:MGI:1925139]                                                       | Q9CX60;F6UVG6                                                                                                                                                                                                                                                                                                                                 |
| 81 | <b>Ccdc3</b>    | 17.29 | 8.42 | 0.49 | 0.00 | coiled-coil domain containing 3 [Source:MGI Symbol;Acc:MGI:1921436]                                          | coiled-coil domain containing 3 [Source:MGI Symbol;Acc:MGI:1921436]                                          | Q9D6Y1                                                                                                                                                                                                                                                                                                                                        |
| 82 | <b>Slc4a7</b>   | 0.70  | 0.34 | 0.48 | 0.01 | solute carrier family 4, sodium bicarbonate cotransporter, member 7 [Source:MGI Symbol;Acc:MGI:2443878]      | solute carrier family 4, sodium bicarbonate cotransporter, member 7 [Source:MGI Symbol;Acc:MGI:2443878]      | Q8B1T2;A0A286YCE1;A0A286YCH3;A0A286YCG1;A0A286YCS4;A0A286YCU2;A0A286YCX8;A0A286YD14;A0A286YD46;A0A286YD88;A0A286YDA9;A0A286YDB4;A0A286YDJ7;A0A286YDK8;A0A286YDR1;A0A286YDX4;A0A286YDZ8;A0A286YED8;D3Y272;D3Y273;E3UVT8;E3UVT9;F8VQC9;H6WZ45;H6WZF5;I1VGT4;I1VGT5;I1VGT6;J7H931;J9RDH0;J9RV59;J9RZB2;J9S4N6;J9S7F7;Q8BWZ4;Q9JL09;U3RF68;U3RKD2 |
| 83 | <b>Slc24a3</b>  | 14.45 | 7.00 | 0.48 | 0.01 | solute carrier family 24 (sodium/potassium/calcium exchanger), member 3 [Source:MGI Symbol;Acc:MGI:2137513]  | solute carrier family 24 (sodium/potassium/calcium exchanger), member 3 [Source:MGI Symbol;Acc:MGI:2137513]  | Q99PD7;Q8VD29                                                                                                                                                                                                                                                                                                                                 |
| 84 | <b>Enc1</b>     | 3.86  | 1.87 | 0.48 | 0.02 | ectodermal-neural cortex 1 [Source:MGI Symbol;Acc:MGI:109610]                                                | ectodermal-neural cortex 1 [Source:MGI Symbol;Acc:MGI:109610]                                                | O35709;Q8BRG4                                                                                                                                                                                                                                                                                                                                 |
| 85 | <b>Fbnp1</b>    | 9.44  | 4.58 | 0.48 | 0.01 | formin binding protein 1 [Source:MGI Symbol;Acc:MGI:109606]                                                  | formin binding protein 1 [Source:MGI Symbol;Acc:MGI:109606]                                                  | Q80TY0;A0A0A6YWT1;A2AQ39;A2AQ41;A2AQ42;A2AQ43;A2AQ44;A2AQ45;A2AQ47;F6VVN1;Q3UF06;Q61053                                                                                                                                                                                                                                                       |
| 86 | <b>Ctrl</b>     | 0.87  | 0.42 | 0.48 | 0.05 | chymotrypsin-like [Source:MGI Symbol;Acc:MGI:88558]                                                          | chymotrypsin-like [Source:MGI Symbol;Acc:MGI:88558]                                                          | Q9D7P8;Q9D960;Q9DC82;Q9ER05;Q9CR35                                                                                                                                                                                                                                                                                                            |
| 87 | <b>Gm4549</b>   | 13.42 | 6.50 | 0.48 | 0.00 | predicted gene 4549 [Source:MGI Symbol;Acc:MGI:3782733]                                                      | predicted gene 4549 [Source:MGI Symbol;Acc:MGI:3782733]                                                      |                                                                                                                                                                                                                                                                                                                                               |
| 88 | <b>Slc39a11</b> | 1.38  | 0.67 | 0.48 | 0.01 | solute carrier family 39 (metal ion transporter), member 11 [Source:MGI Symbol;Acc:MGI:1917056]              | solute carrier family 39 (metal ion transporter), member 11 [Source:MGI Symbol;Acc:MGI:1917056]              | Q8BWY7;B1ARC2;B1ARC3;B1ARC4;B1ARC5                                                                                                                                                                                                                                                                                                            |

|     |                 |        |       |      |      |                                                                                                                  |                                                                                                                  |                                                                                                                    |
|-----|-----------------|--------|-------|------|------|------------------------------------------------------------------------------------------------------------------|------------------------------------------------------------------------------------------------------------------|--------------------------------------------------------------------------------------------------------------------|
| 89  | <b>Gm11634</b>  | 0.78   | 0.38  | 0.48 | 0.01 | predicted gene 11634<br>[Source:MGI<br>Symbol;Acc:MGI:3650266]                                                   | predicted gene 11634<br>[Source:MGI<br>Symbol;Acc:MGI:3650266]                                                   | A0A1B0GR37;A0A1B0GSX1                                                                                              |
| 90  | <b>Gm14149</b>  | 3.83   | 1.85  | 0.48 | 0.01 | predicted gene 14149<br>[Source:MGI<br>Symbol;Acc:MGI:3651549]                                                   | predicted gene 14149<br>[Source:MGI<br>Symbol;Acc:MGI:3651549]                                                   | Q3ULR8                                                                                                             |
| 91  | <b>Atn1</b>     | 22.44  | 10.85 | 0.48 | 0.01 | atrophin 1 [Source:MGI<br>Symbol;Acc:MGI:104725]                                                                 | atrophin 1 [Source:MGI<br>Symbol;Acc:MGI:104725]                                                                 | O35126                                                                                                             |
| 92  | <b>Gm11821</b>  | 0.90   | 0.44  | 0.48 | 0.05 | predicted gene 11821<br>[Source:MGI<br>Symbol;Acc:MGI:3649777]                                                   | predicted gene 11821<br>[Source:MGI<br>Symbol;Acc:MGI:3649777]                                                   |                                                                                                                    |
| 93  | <b>Nacc2</b>    | 4.71   | 2.27  | 0.48 | 0.01 | nucleus accumbens associated<br>2, BEN and BTB (POZ) domain<br>containing [Source:MGI<br>Symbol;Acc:MGI:1915241] | nucleus accumbens associated<br>2, BEN and BTB (POZ) domain<br>containing [Source:MGI<br>Symbol;Acc:MGI:1915241] | Q9DCM7;A2ARL3;Q8BXX1                                                                                               |
| 94  | <b>Pcolce</b>   | 66.57  | 31.99 | 0.48 | 0.00 | procollagen C-endopeptidase<br>enhancer protein [Source:MGI<br>Symbol;Acc:MGI:105099]                            | procollagen C-endopeptidase<br>enhancer protein [Source:MGI<br>Symbol;Acc:MGI:105099]                            | Q61398;A0A0G2JE29;D3YUE2;D3YWH0;D3YZE3;Q3TX39;Q3UIP2<br>;Q3UN82                                                    |
| 95  | <b>Ubiad1</b>   | 2.94   | 1.41  | 0.48 | 0.00 | UbiA prenyltransferase domain<br>containing 1 [Source:MGI<br>Symbol;Acc:MGI:1918957]                             | UbiA prenyltransferase domain<br>containing 1 [Source:MGI<br>Symbol;Acc:MGI:1918957]                             | Q9DC60                                                                                                             |
| 96  | <b>Arhgef17</b> | 1.76   | 0.84  | 0.48 | 0.00 | Rho guanine nucleotide<br>exchange factor (GEF) 17<br>[Source:MGI<br>Symbol;Acc:MGI:2673002]                     | Rho guanine nucleotide<br>exchange factor (GEF) 17<br>[Source:MGI<br>Symbol;Acc:MGI:2673002]                     | Q80U35;A0A140LIQ0                                                                                                  |
| 97  | <b>Ptch1</b>    | 1.40   | 0.67  | 0.48 | 0.01 | patched 1 [Source:MGI<br>Symbol;Acc:MGI:105373]                                                                  | patched 1 [Source:MGI<br>Symbol;Acc:MGI:105373]                                                                  | Q61115;A0A0A6YVW7;A0A0A6YVX7;A0A0A6YWC4;A0A0A6YWZ<br>4;Q3LG17;Q3TM50;Q3TQB0;Q3UUD4;Q5R1U4;Q5R252;Q5TLE7;<br>Q5TLE8 |
| 98  | <b>Pmepa1</b>   | 104.41 | 50.07 | 0.48 | 0.00 | prostate transmembrane<br>protein, androgen induced 1<br>[Source:MGI<br>Symbol;Acc:MGI:1929600]                  | prostate transmembrane<br>protein, androgen induced 1<br>[Source:MGI<br>Symbol;Acc:MGI:1929600]                  | Q9D7R2;A2APF4;A2APF5;Q4QRN6;Q6NST6                                                                                 |
| 99  | <b>Gnao1</b>    | 18.98  | 9.09  | 0.48 | 0.02 | guanine nucleotide binding<br>protein, alpha O [Source:MGI<br>Symbol;Acc:MGI:95775]                              | guanine nucleotide binding<br>protein, alpha O [Source:MGI<br>Symbol;Acc:MGI:95775]                              | P18872;D3Z2M7;F6W1B2;F6WC15;F7BLT7;Q543S2                                                                          |
| 100 | <b>Mid1</b>     | 11.25  | 5.39  | 0.48 | 0.00 | midline 1 [Source:MGI<br>Symbol;Acc:MGI:1100537]                                                                 | midline 1 [Source:MGI<br>Symbol;Acc:MGI:1100537]                                                                 | Q04841;F2Z3Y1;Q3U1C9;O70583;B1AUZ9;B1AV01;Q3TVH5;Q3U<br>XC7;Q6PD02                                                 |

|     |                      |       |       |      |      |                                                                             |                                                                             |                                                                                                             |
|-----|----------------------|-------|-------|------|------|-----------------------------------------------------------------------------|-----------------------------------------------------------------------------|-------------------------------------------------------------------------------------------------------------|
| 101 | <b>Srcap</b>         | 18.18 | 8.70  | 0.48 | 0.00 | Snf2-related CREBBP activator protein [Source:MGI Symbol;Acc:MGI:2444036]   | Snf2-related CREBBP activator protein [Source:MGI Symbol;Acc:MGI:2444036]   | A0A087WNL7;A0A087WNL7;A0A087WQ44;A0A087WQY5;A0A087WS36;A0A087WSL6;E9Q9V7;Q3U4M6;Q8BKT0;Q8BQA6;Q8BUY7;Q8BV54 |
| 102 | <b>Foxo4</b>         | 18.36 | 8.77  | 0.48 | 0.01 | forkhead box O4 [Source:MGI Symbol;Acc:MGI:1891915]                         | forkhead box O4 [Source:MGI Symbol;Acc:MGI:1891915]                         | Q9WVH3;B1AUT2;B1AUT3;Q3TZJ4;Q4KL34                                                                          |
| 103 | <b>Gpatch2</b>       | 3.35  | 1.60  | 0.48 | 0.00 | G patch domain containing 2 [Source:MGI Symbol;Acc:MGI:1915019]             | G patch domain containing 2 [Source:MGI Symbol;Acc:MGI:1915019]             | Q7TQC7;E0CZ29;E9PY25;M0QWF5;M0QWJ1;Q3TIJ8;Q9CSX3;Q9D3E7                                                     |
| 104 | <b>Strn</b>          | 1.72  | 0.82  | 0.48 | 0.01 | striatin, calmodulin binding protein [Source:MGI Symbol;Acc:MGI:1333757]    | striatin, calmodulin binding protein [Source:MGI Symbol;Acc:MGI:1333757]    | O55106;F6Z700;F8WH41;Q3TT86;Q3UWX9;Q8BKL4                                                                   |
| 105 | <b>Fyco1</b>         | 6.22  | 2.97  | 0.48 | 0.00 | FYVE and coiled-coil domain containing 1 [Source:MGI Symbol;Acc:MGI:107277] | FYVE and coiled-coil domain containing 1 [Source:MGI Symbol;Acc:MGI:107277] | Q8VDC1;A0A140T8V9                                                                                           |
| 106 | <b>Zfp532</b>        | 5.44  | 2.59  | 0.48 | 0.00 | zinc finger protein 532 [Source:MGI Symbol;Acc:MGI:3036282]                 | zinc finger protein 532 [Source:MGI Symbol;Acc:MGI:3036282]                 | Q6NXX2;Q3TQ12;Q811G4;S4R1B5;S4R1F4;S4R1F7;S4R1H5;S4R1P1;S4R1U0;S4R2D8;S4R2I9;S4R2M5;S4R2T9                  |
| 107 | <b>Plpp6</b>         | 4.59  | 2.19  | 0.48 | 0.04 | Phospholipid Phosphatase 6 MGI:1921661                                      | Phospholipid Phosphatase 6 MGI:1921661                                      | Q9D4F2                                                                                                      |
| 108 | <b>1700020D05Rik</b> | 0.68  | 0.32  | 0.48 | 0.05 | RIKEN cDNA 1700020D05 gene [Source:MGI Symbol;Acc:MGI:1922805]              | RIKEN cDNA 1700020D05 gene [Source:MGI Symbol;Acc:MGI:1922805]              | Q99PB1;Q9DA56                                                                                               |
| 109 | <b>Tulp4</b>         | 2.59  | 1.23  | 0.47 | 0.01 | tubby like protein 4 [Source:MGI Symbol;Acc:MGI:1916092]                    | tubby like protein 4 [Source:MGI Symbol;Acc:MGI:1916092]                    | Q9JIL5;D3Z003;F6UMF8;Q3TDP7;Q3UH13;Q69ZK3                                                                   |
| 110 | <b>C130074G19Rik</b> | 22.40 | 10.63 | 0.47 | 0.00 | RIKEN cDNA C130074G19 gene [Source:MGI Symbol;Acc:MGI:2444831]              | RIKEN cDNA C130074G19 gene [Source:MGI Symbol;Acc:MGI:2444831]              | Q8BGN9                                                                                                      |
| 111 | <b>Nbeal1</b>        | 1.10  | 0.52  | 0.47 | 0.00 | neurobeachin like 1 [Source:MGI Symbol;Acc:MGI:2444343]                     | neurobeachin like 1 [Source:MGI Symbol;Acc:MGI:2444343]                     | E9PV03;E9PYP2;F6U6E8;F7BJ98;F7D418;Q7TMN9;Q8BRX5;Q8BS04                                                     |
| 112 | <b>Shroom4</b>       | 2.69  | 1.28  | 0.47 | 0.01 | shroom family member 4 [Source:MGI Symbol;Acc:MGI:2685570]                  | shroom family member 4 [Source:MGI Symbol;Acc:MGI:2685570]                  | Q1W617;E9PUX3                                                                                               |
| 113 | <b>Atxn1l</b>        | 2.54  | 1.20  | 0.47 | 0.01 | ataxin 1-like [Source:MGI Symbol;Acc:MGI:3694797]                           | ataxin 1-like [Source:MGI Symbol;Acc:MGI:3694797]                           | P0C7T6;A0A1D5RLP5                                                                                           |

|     |                 |       |       |      |      |                                                                                              |                                                                                              |                                                                                                                 |
|-----|-----------------|-------|-------|------|------|----------------------------------------------------------------------------------------------|----------------------------------------------------------------------------------------------|-----------------------------------------------------------------------------------------------------------------|
| 114 | <b>Abhd2</b>    | 1.10  | 0.52  | 0.47 | 0.04 | abhydrolase domain containing 2 [Source:MGI Symbol;Acc:MGI:1914344]                          | abhydrolase domain containing 2 [Source:MGI Symbol;Acc:MGI:1914344]                          | Q9QXM0                                                                                                          |
| 115 | <b>Chd3</b>     | 18.27 | 8.63  | 0.47 | 0.00 | chromodomain helicase DNA binding protein 3 [Source:MGI Symbol;Acc:MGI:1344395]              | chromodomain helicase DNA binding protein 3 [Source:MGI Symbol;Acc:MGI:1344395]              | B0QZH7;B0QZH8;B1AR17;E9Q614;F6V4V3;F7C528;O35327;Q7TML9;Q8BR71;Q8K0T3;A2A8L1;E9PYL1;E9PYU4;Q4QQN1;Q8BL30;Q9CUI4 |
| 116 | <b>Auts2</b>    | 1.78  | 0.84  | 0.47 | 0.02 | autism susceptibility candidate 2 [Source:MGI Symbol;Acc:MGI:1919847]                        | autism susceptibility candidate 2 [Source:MGI Symbol;Acc:MGI:1919847]                        | A0A087WPF7;A0A087WSK2;A0A2C9F2I4;E0CZ47;E9PZ86;J3QNT9;Q3UX71;Q6PED7;Q8BZC7;Q8C173;Q8VDM3;Q9CSL7;S4R200          |
| 117 | <b>Ppp1r9a</b>  | 1.51  | 0.71  | 0.47 | 0.00 | protein phosphatase 1, regulatory (inhibitor) subunit 9A [Source:MGI Symbol;Acc:MGI:2442401] | protein phosphatase 1, regulatory (inhibitor) subunit 9A [Source:MGI Symbol;Acc:MGI:2442401] | H3BJA6;H3BJD0;H3BJD6;H3BKE7;H3BKQ7;H3BL28;Q3UUK5;Q3UW4;Q7TN74;Q7TSA7;Q80TH3;Q80ZL7;Q8BMP0                       |
| 118 | <b>Casp7</b>    | 3.80  | 1.79  | 0.47 | 0.05 | caspase 7 [Source:MGI Symbol;Acc:MGI:109383]                                                 | caspase 7 [Source:MGI Symbol;Acc:MGI:109383]                                                 | P97864;Q4FIQ4;Q8C4M5                                                                                            |
| 119 | <b>Rest</b>     | 1.06  | 0.50  | 0.47 | 0.01 | RE1-silencing transcription factor [Source:MGI Symbol;Acc:MGI:104897]                        | RE1-silencing transcription factor [Source:MGI Symbol;Acc:MGI:104897]                        | Q8VIG1;F8V330;Q60694                                                                                            |
| 120 | <b>Ncoa2</b>    | 2.06  | 0.97  | 0.47 | 0.00 | nuclear receptor coactivator 2 [Source:MGI Symbol;Acc:MGI:1276533]                           | nuclear receptor coactivator 2 [Source:MGI Symbol;Acc:MGI:1276533]                           | Q61026;A6P3E3;D3Z4F6;E9PV80;Q7TPU7;Q8BN74;Q8C961;Q8CAG7;Q8CBM5;Q8CE59                                           |
| 121 | <b>Slc25a44</b> | 9.07  | 4.27  | 0.47 | 0.02 | solute carrier family 25, member 44 [Source:MGI Symbol;Acc:MGI:2444391]                      | solute carrier family 25, member 44 [Source:MGI Symbol;Acc:MGI:2444391]                      | Q8BGF9;Q05DJ3;Q3TDQ9;Q3TE12;Q3TMC4;Q3TNN4                                                                       |
| 122 | <b>Hk2</b>      | 22.98 | 10.81 | 0.47 | 0.01 | hexokinase 2 [Source:MGI Symbol;Acc:MGI:1315197]                                             | hexokinase 2 [Source:MGI Symbol;Acc:MGI:1315197]                                             | Q61762;P28740;E0CZ72;F6RLL5;F8VQ42;Q9D481;O08528;E9Q5B5;E9Q9M6;Q7TMK6;A0A1B0GSU8;A0A1B0GT78;Q3TKK8;Q3UWV9       |
| 123 | <b>Dusp10</b>   | 12.24 | 5.75  | 0.47 | 0.00 | dual specificity phosphatase 10 [Source:MGI Symbol;Acc:MGI:1927070]                          | dual specificity phosphatase 10 [Source:MGI Symbol;Acc:MGI:1927070]                          | Q9ESS0;D3Z2S1                                                                                                   |
| 124 | <b>Ptger4</b>   | 2.94  | 1.38  | 0.47 | 0.02 | prostaglandin E receptor 4 (subtype EP4) [Source:MGI Symbol;Acc:MGI:104311]                  | prostaglandin E receptor 4 (subtype EP4) [Source:MGI Symbol;Acc:MGI:104311]                  | P32240;Q3UM94;Q8BZK1;Q91VE4                                                                                     |
| 125 | <b>Cox15</b>    | 5.54  | 2.60  | 0.47 | 0.01 | cytochrome c oxidase assembly protein 15 [Source:MGI Symbol;Acc:MGI:1920112]                 | cytochrome c oxidase assembly protein 15 [Source:MGI Symbol;Acc:MGI:1920112]                 | Q8BJ03                                                                                                          |
| 126 | <b>Rgp1</b>     | 9.17  | 4.30  | 0.47 | 0.01 | RAB6A GEF compex partner 1 [Source:MGI Symbol;Acc:MGI:1915956]                               | RAB6A GEF compex partner 1 [Source:MGI Symbol;Acc:MGI:1915956]                               | P43137;Q3TV26;Q8C6F9;Q9ERU9;Q3TYW0;Q8BQK6;Q8BHT7;Q3TDM6                                                         |

|     |                |       |      |      |      |                                                                                                  |                                                                                                  |                                                                                                                       |
|-----|----------------|-------|------|------|------|--------------------------------------------------------------------------------------------------|--------------------------------------------------------------------------------------------------|-----------------------------------------------------------------------------------------------------------------------|
| 127 | <b>Aebp2</b>   | 10.34 | 4.83 | 0.47 | 0.00 | AE binding protein 2 [Source:MGI Symbol;Acc:MGI:1338038]                                         | AE binding protein 2 [Source:MGI Symbol;Acc:MGI:1338038]                                         | Q9Z248;F6V059;I6L987                                                                                                  |
| 128 | <b>Foxj2</b>   | 5.02  | 2.35 | 0.47 | 0.02 | forkhead box J2 [Source:MGI Symbol;Acc:MGI:1926805]                                              | forkhead box J2 [Source:MGI Symbol;Acc:MGI:1926805]                                              | Q9ES18;A0A0N4SWA4;Q3U3U9                                                                                              |
| 129 | <b>Wscd2</b>   | 1.86  | 0.87 | 0.47 | 0.02 | WSC domain containing 2 [Source:MGI Symbol;Acc:MGI:2445030]                                      | WSC domain containing 2 [Source:MGI Symbol;Acc:MGI:2445030]                                      | D4PHA7                                                                                                                |
| 130 | <b>Slc45a4</b> | 2.37  | 1.11 | 0.47 | 0.02 | solute carrier family 45, member 4 [Source:MGI Symbol;Acc:MGI:2146236]                           | solute carrier family 45, member 4 [Source:MGI Symbol;Acc:MGI:2146236]                           | Q0P5V9;D3Z0C0;F7BEQ1;Q8CBY6                                                                                           |
| 131 | <b>Syne3</b>   | 1.79  | 0.83 | 0.47 | 0.01 | spectrin repeat containing, nuclear envelope family member 3 [Source:MGI Symbol;Acc:MGI:2442408] | spectrin repeat containing, nuclear envelope family member 3 [Source:MGI Symbol;Acc:MGI:2442408] | Q4FZC9                                                                                                                |
| 132 | <b>Ccdc85a</b> | 4.17  | 1.94 | 0.47 | 0.02 | coiled-coil domain containing 85A [Source:MGI Symbol;Acc:MGI:2445069]                            | coiled-coil domain containing 85A [Source:MGI Symbol;Acc:MGI:2445069]                            | Q5SP85;E0CX32;F6TRJ8;F7B6W4                                                                                           |
| 133 | <b>Jmy</b>     | 1.87  | 0.87 | 0.47 | 0.01 | junction-mediating and regulatory protein [Source:MGI Symbol;Acc:MGI:1913096]                    | junction-mediating and regulatory protein [Source:MGI Symbol;Acc:MGI:1913096]                    | Q9QXM1;A0A0R4J0V4;A0A1Y7VLC3                                                                                          |
| 134 | <b>Itgav</b>   | 0.80  | 0.37 | 0.46 | 0.01 | integrin alpha V [Source:MGI Symbol;Acc:MGI:96608]                                               | integrin alpha V [Source:MGI Symbol;Acc:MGI:96608]                                               | P43406;A0A0F7IQ06;A2AKI5;B7ZCI9;F6RWM8;F6W6Q6;Q3U4C8;Q80Y67                                                           |
| 135 | <b>Akap13</b>  | 4.10  | 1.90 | 0.46 | 0.00 | A kinase (PRKA) anchor protein 13 [Source:MGI Symbol;Acc:MGI:2676556]                            | A kinase (PRKA) anchor protein 13 [Source:MGI Symbol;Acc:MGI:2676556]                            | E9Q394;A0A140LHG3;A0A140LHQ3;A0A140LID7;A0A140LIX0;A0A140LJJ5;Q3T998;Q3TA34;Q3TR80;Q3TZA8;Q3UZK5;Q8BYV7;Q924X9;Q9D9W9 |
| 136 | <b>Cbx6</b>    | 2.28  | 1.06 | 0.46 | 0.01 | chromobox 6 [Source:MGI Symbol;Acc:MGI:3512628]                                                  | chromobox 6 [Source:MGI Symbol;Acc:MGI:3512628]                                                  | Q9DBY5;D3Z329;D3Z5F6;Q3UK98;Q9CYM8;F8VQB8;H3BLN6;Q6TKP2;Q6TLW0;Q6TLW1                                                 |
| 137 | <b>Tppp</b>    | 2.32  | 1.07 | 0.46 | 0.05 | tubulin polymerization promoting protein [Source:MGI Symbol;Acc:MGI:1920198]                     | tubulin polymerization promoting protein [Source:MGI Symbol;Acc:MGI:1920198]                     | Q7TQD2;Q3URG1                                                                                                         |
| 138 | <b>Elmsan1</b> | 3.39  | 1.57 | 0.46 | 0.01 | ELM2 and Myb/SANT-like domain containing 1 [Source:MGI Symbol;Acc:MGI:2685106]                   | ELM2 and Myb/SANT-like domain containing 1 [Source:MGI Symbol;Acc:MGI:2685106]                   | A0A1Y7VP67;E9Q2I4;Q3U224;Q8BUZ9                                                                                       |

|     |                      |         |        |      |      |                                                                                         |                                                                                         |                                                                                                    |
|-----|----------------------|---------|--------|------|------|-----------------------------------------------------------------------------------------|-----------------------------------------------------------------------------------------|----------------------------------------------------------------------------------------------------|
| 139 | <b>Kmt2a</b>         | 4.67    | 2.16   | 0.46 | 0.01 | lysine (K)-specific methyltransferase 2A [Source:MGI Symbol;Acc:MGI:96995]              | lysine (K)-specific methyltransferase 2A [Source:MGI Symbol;Acc:MGI:96995]              | P55200;A0A1L1SQS9;D3Z5H5;Q5DTR3;Q80XM0;S4R199;S4R2S5                                               |
| 140 | <b>Fam222b</b>       | 2.90    | 1.34   | 0.46 | 0.00 | family with sequence similarity 222, member B [Source:MGI Symbol;Acc:MGI:2384939]       | family with sequence similarity 222, member B [Source:MGI Symbol;Acc:MGI:2384939]       | Q6P539;E9PXL0;Q3V2W6                                                                               |
| 141 | <b>Gpd1l</b>         | 3.53    | 1.63   | 0.46 | 0.00 | glycerol-3-phosphate dehydrogenase 1-like [Source:MGI Symbol;Acc:MGI:1289257]           | glycerol-3-phosphate dehydrogenase 1-like [Source:MGI Symbol;Acc:MGI:1289257]           | Q3ULJ0;B2RSR7;D3Z0L6                                                                               |
| 142 | <b>Maml2</b>         | 1.09    | 0.50   | 0.46 | 0.01 | mastermind like 2 (Drosophila) [Source:MGI Symbol;Acc:MGI:2389460]                      | mastermind like 2 (Drosophila) [Source:MGI Symbol;Acc:MGI:2389460]                      | E9Q7L5;F6U238;Q6ZPH8;Q7TPU6;Q8BMG4;Q8BYF1                                                          |
| 143 | <b>Hif1an</b>        | 2.44    | 1.13   | 0.46 | 0.00 | hypoxia-inducible factor 1, alpha subunit inhibitor [Source:MGI Symbol;Acc:MGI:2442345] | hypoxia-inducible factor 1, alpha subunit inhibitor [Source:MGI Symbol;Acc:MGI:2442345] | Q8BLR9;Q9D6X3                                                                                      |
| 144 | <b>4933436I20Rik</b> | 12.98   | 6.00   | 0.46 | 0.00 | RIKEN cDNA 4933436I20 gene [Source:MGI Symbol;Acc:MGI:1918540]                          | RIKEN cDNA 4933436I20 gene [Source:MGI Symbol;Acc:MGI:1918540]                          |                                                                                                    |
| 145 | <b>Kdm7a</b>         | 1.11    | 0.51   | 0.46 | 0.00 | lysine (K)-specific demethylase 7A [Source:MGI Symbol;Acc:MGI:2443388]                  | lysine (K)-specific demethylase 7A [Source:MGI Symbol;Acc:MGI:2443388]                  | Q3UWM4;Q3TQA8                                                                                      |
| 146 | <b>Myh9</b>          | 45.07   | 20.80  | 0.46 | 0.00 | myosin, heavy polypeptide 9, non-muscle [Source:MGI Symbol;Acc:MGI:107717]              | myosin, heavy polypeptide 9, non-muscle [Source:MGI Symbol;Acc:MGI:107717]              | Q8VDD5;A0A2R8VKI5;A0A2R8W6V7;A2VCK0;F2Z494;O89055;Q14B05;Q3UFT0;Q7TQJ6;Q811J9;Q8BIE2;Q8BIM8;Q99JJ3 |
| 147 | <b>Gpd1</b>          | 1162.32 | 536.23 | 0.46 | 0.02 | glycerol-3-phosphate dehydrogenase 1 (soluble) [Source:MGI Symbol;Acc:MGI:95679]        | glycerol-3-phosphate dehydrogenase 1 (soluble) [Source:MGI Symbol;Acc:MGI:95679]        | P13707;E0CXN5;Q8CFX1;A2A7A7;A2A7A8;Q3TFM8;Q8BMC8;Q8QZU3                                            |
| 148 | <b>Myo18a</b>        | 2.03    | 0.94   | 0.46 | 0.01 | myosin XVIIIa [Source:MGI Symbol;Acc:MGI:2667185]                                       | myosin XVIIIa [Source:MGI Symbol;Acc:MGI:2667185]                                       | Q9JMH9;A0A1C7ZN10;B2RRE2;E9PUR2;E9Q0K8;E9Q405;E9QA74;E9QAX2;F6ZGN3;K3W4L0;Q3UIM4;Q6PER1            |
| 149 | <b>Per1</b>          | 11.80   | 5.44   | 0.46 | 0.00 | period circadian clock 1 [Source:MGI Symbol;Acc:MGI:1098283]                            | period circadian clock 1 [Source:MGI Symbol;Acc:MGI:1098283]                            | O35973;B0QZN6;E9Q8V5;Q3U378;Q3UFZ7;Q5BJ30;Q6A060;Q8C4K7;Q8CHR1                                     |
| 150 | <b>Rbm15</b>         | 3.17    | 1.46   | 0.46 | 0.01 | RNA binding motif protein 15 [Source:MGI Symbol;Acc:MGI:2443205]                        | RNA binding motif protein 15 [Source:MGI Symbol;Acc:MGI:2443205]                        | Q0VBL3                                                                                             |

|     |                |       |       |      |      |                                                                                                      |                                                                                                      |                                                                                                                     |
|-----|----------------|-------|-------|------|------|------------------------------------------------------------------------------------------------------|------------------------------------------------------------------------------------------------------|---------------------------------------------------------------------------------------------------------------------|
| 151 | <b>Hipk1</b>   | 10.02 | 4.61  | 0.46 | 0.00 | homeodomain interacting protein kinase 1 [Source:MGI Symbol;Acc:MGI:1314873]                         | homeodomain interacting protein kinase 1 [Source:MGI Symbol;Acc:MGI:1314873]                         | O88904;A0A0R4J1V6;A0S0D6;A0S0D7;A0S0D8;A0S0D9;A0S0E0;A0S0E1;A0S0E2;A0S0L0;A0S0L1;A0S0L2;A0S0L3;A0S0L4;A0S0L5;Q8C642 |
| 152 | <b>Mast4</b>   | 1.88  | 0.87  | 0.46 | 0.00 | microtubule associated serine/threonine kinase family member 4 [Source:MGI Symbol;Acc:MGI:1918885]   | microtubule associated serine/threonine kinase family member 4 [Source:MGI Symbol;Acc:MGI:1918885]   | Q811L6;A0A0A6YXG1;E9PWX8;E9Q1M8;E9Q4Q9;E9Q6G0;E9QPR4;F7AIF3;Q62490;Q8BGU6                                           |
| 153 | <b>Zfp516</b>  | 1.25  | 0.57  | 0.46 | 0.01 | zinc finger protein 516 [Source:MGI Symbol;Acc:MGI:2443957]                                          | zinc finger protein 516 [Source:MGI Symbol;Acc:MGI:2443957]                                          | Q7TSH3;Q8K3C2                                                                                                       |
| 154 | <b>Leng8</b>   | 44.36 | 20.38 | 0.46 | 0.01 | leukocyte receptor cluster (LRC) member 8 [Source:MGI Symbol;Acc:MGI:2142195]                        | leukocyte receptor cluster (LRC) member 8 [Source:MGI Symbol;Acc:MGI:2142195]                        | Q8CBY3;D3YTL3;D3YWS8;D3YXV8;D3YY84;D3Z042                                                                           |
| 155 | <b>Epas1</b>   | 61.99 | 28.48 | 0.46 | 0.01 | endothelial PAS domain protein 1 [Source:MGI Symbol;Acc:MGI:109169]                                  | endothelial PAS domain protein 1 [Source:MGI Symbol;Acc:MGI:109169]                                  | P97481;Q6PEU2                                                                                                       |
| 156 | <b>Mbnl2</b>   | 9.07  | 4.17  | 0.46 | 0.01 | muscleblind like splicing factor 2 [Source:MGI Symbol;Acc:MGI:2145597]                               | muscleblind like splicing factor 2 [Source:MGI Symbol;Acc:MGI:2145597]                               | Q8C181;A0A2I3BRX8;A0A2K6EDM5;D0EX61                                                                                 |
| 157 | <b>Cnnm3</b>   | 2.89  | 1.32  | 0.46 | 0.00 | cyclin M3 [Source:MGI Symbol;Acc:MGI:2151055]                                                        | cyclin M3 [Source:MGI Symbol;Acc:MGI:2151055]                                                        | Q32NY4;C6KI94;Q3TTT5                                                                                                |
| 158 | <b>Figl12</b>  | 2.01  | 0.92  | 0.46 | 0.00 | fidgetin-like 2 [Source:MGI Symbol;Acc:MGI:3646919]                                                  | fidgetin-like 2 [Source:MGI Symbol;Acc:MGI:3646919]                                                  | J3QK54                                                                                                              |
| 159 | <b>Phf8</b>    | 1.18  | 0.54  | 0.46 | 0.00 | PHD finger protein 8 [Source:MGI Symbol;Acc:MGI:2444341]                                             | PHD finger protein 8 [Source:MGI Symbol;Acc:MGI:2444341]                                             |                                                                                                                     |
| 160 | <b>Mpp2</b>    | 3.54  | 1.62  | 0.46 | 0.01 | membrane protein, palmitoylated 2 (MAGUK p55 subfamily member 2) [Source:MGI Symbol;Acc:MGI:1858257] | membrane protein, palmitoylated 2 (MAGUK p55 subfamily member 2) [Source:MGI Symbol;Acc:MGI:1858257] | O08696;A0A0N4SVY9;A0A0N4SWD2;E9Q7Y0;Q6DI64;Q6P1H7;Q8C7V5;Q922T7;Q9WV34                                              |
| 161 | <b>Ccdc126</b> | 1.29  | 0.59  | 0.46 | 0.01 | coiled-coil domain containing 126 [Source:MGI Symbol;Acc:MGI:1889376]                                | coiled-coil domain containing 126 [Source:MGI Symbol;Acc:MGI:1889376]                                | Q8BIS8                                                                                                              |
| 162 | <b>Acaca</b>   | 42.79 | 19.56 | 0.46 | 0.02 | acetyl-Coenzyme A carboxylase alpha [Source:MGI Symbol;Acc:MGI:108451]                               | acetyl-Coenzyme A carboxylase alpha [Source:MGI Symbol;Acc:MGI:108451]                               | Q5SWU9;A0A0R4J1S9;Q9ESZ5;V9GWR9;V9GWS0;V9GWS1;V9GXY1                                                                |

|     |                |          |         |      |      |                                                                                              |                                                                                              |                                                                           |
|-----|----------------|----------|---------|------|------|----------------------------------------------------------------------------------------------|----------------------------------------------------------------------------------------------|---------------------------------------------------------------------------|
| 163 | <b>Gpsm1</b>   | 1.63     | 0.74    | 0.46 | 0.01 | G-protein signalling modulator 1 (AGS3-like, C. elegans) [Source:MGI Symbol;Acc:MGI:1915089] | G-protein signalling modulator 1 (AGS3-like, C. elegans) [Source:MGI Symbol;Acc:MGI:1915089] | Q6IR34;A2AIV3;A2AIV4;F6SX81;Q8R0E6                                        |
| 164 | <b>Zhx3</b>    | 2.24     | 1.02    | 0.46 | 0.02 | zinc fingers and homeoboxes 3 [Source:MGI Symbol;Acc:MGI:2444772]                            | zinc fingers and homeoboxes 3 [Source:MGI Symbol;Acc:MGI:2444772]                            | Q8C0Q2;F6V503;H3BIX6;Q3UPQ8                                               |
| 165 | <b>Etv3</b>    | 5.16     | 2.35    | 0.46 | 0.01 | ets variant 3 [Source:MGI Symbol;Acc:MGI:1350926]                                            | ets variant 3 [Source:MGI Symbol;Acc:MGI:1350926]                                            | Q8R4Z4;D3YVU8;Q3U1H6;Q8BN37                                               |
| 166 | <b>Kremen1</b> | 2.59     | 1.18    | 0.46 | 0.01 | kringle containing transmembrane protein 1 [Source:MGI Symbol;Acc:MGI:1933988]               | kringle containing transmembrane protein 1 [Source:MGI Symbol;Acc:MGI:1933988]               | Q99N43;F6S1T7;Q8BNJ0                                                      |
| 167 | <b>Rab5b</b>   | 13.17    | 6.01    | 0.46 | 0.01 | RAB5B, member RAS oncogene family [Source:MGI Symbol;Acc:MGI:105938]                         | RAB5B, member RAS oncogene family [Source:MGI Symbol;Acc:MGI:105938]                         | P61021;B2RPS1;Q0PD56;Q8C458                                               |
| 168 | <b>Zfp652</b>  | 4.28     | 1.95    | 0.46 | 0.01 | zinc finger protein 652 [Source:MGI Symbol;Acc:MGI:2442221]                                  | zinc finger protein 652 [Source:MGI Symbol;Acc:MGI:2442221]                                  | Q5DU09;F2Z3V9;F2Z443                                                      |
| 169 | <b>Arsb</b>    | 3.50     | 1.59    | 0.46 | 0.00 | arylsulfatase B [Source:MGI Symbol;Acc:MGI:88075]                                            | arylsulfatase B [Source:MGI Symbol;Acc:MGI:88075]                                            | P50429;A0A0R4J138;B2RWQ7;Q9D1I3;Q9Z0K7;A0A0A0MQ72                         |
| 170 | <b>Vash1</b>   | 2.71     | 1.23    | 0.45 | 0.01 | vasohibin 1 [Source:MGI Symbol;Acc:MGI:2442543]                                              | vasohibin 1 [Source:MGI Symbol;Acc:MGI:2442543]                                              | Q8C1W1;A0PCF8;Q0VGS1;Q9R0B6;A2ATM9;Q99K04                                 |
| 171 | <b>Lamc3</b>   | 1.67     | 0.76    | 0.45 | 0.01 | laminin gamma 3 [Source:MGI Symbol;Acc:MGI:1344394]                                          | laminin gamma 3 [Source:MGI Symbol;Acc:MGI:1344394]                                          | Q9R0B6;A2ATM9;Q99K04                                                      |
| 172 | <b>Rnr1</b>    | 18045.72 | 8186.14 | 0.45 | 0.01 | RNA, Ribosomal 45S Cluster 1 MGI:102493                                                      | N/A                                                                                          | Q06219;A2AAQQ8;Q3TYI4;Q9R1W4                                              |
| 173 | <b>Erf</b>     | 10.78    | 4.89    | 0.45 | 0.03 | Ets2 repressor factor [Source:MGI Symbol;Acc:MGI:109637]                                     | Ets2 repressor factor [Source:MGI Symbol;Acc:MGI:109637]                                     | P70459;A0A0R4J0I0;D3YXK6;Q8BWY3;J3QNS1;P70199;Q3TDF8;Q3TF02;Q3TL10;Q3U6V5 |
| 174 | <b>Nbea</b>    | 0.87     | 0.39    | 0.45 | 0.00 | neurobeachin [Source:MGI Symbol;Acc:MGI:1347075]                                             | neurobeachin [Source:MGI Symbol;Acc:MGI:1347075]                                             | Q9EPN1;Q6P2L4                                                             |

|     |                      |        |        |      |      |                                                                                                                             |                                                                                                                             |                                                                                                        |
|-----|----------------------|--------|--------|------|------|-----------------------------------------------------------------------------------------------------------------------------|-----------------------------------------------------------------------------------------------------------------------------|--------------------------------------------------------------------------------------------------------|
| 175 | <b>Dennd1a</b>       | 6.68   | 3.03   | 0.45 | 0.00 | DENN/MADD domain containing 1A [Source:MGI Symbol;Acc:MGI:2442794]                                                          | DENN/MADD domain containing 1A [Source:MGI Symbol;Acc:MGI:2442794]                                                          | Q8K382;A2ALU3;A2AUP6;D6RH88;D6RHL0;D6RHP6;D6RI65;Q8R1W1                                                |
| 176 | <b>Pdk4</b>          | 245.08 | 110.83 | 0.45 | 0.01 | pyruvate dehydrogenase kinase, isoenzyme 4 [Source:MGI Symbol;Acc:MGI:1351481]                                              | pyruvate dehydrogenase kinase, isoenzyme 4 [Source:MGI Symbol;Acc:MGI:1351481]                                              | Q9JK42;O70571;A0A0N4SW53;Q544J2                                                                        |
| 177 | <b>Ciita</b>         | 0.79   | 0.36   | 0.45 | 0.01 | class II transactivator [Source:MGI Symbol;Acc:MGI:108445]                                                                  | class II transactivator [Source:MGI Symbol;Acc:MGI:108445]                                                                  | P79621;A0A2R8VHC7;A0A2R8VHL9;A0A2R8W6Z7;Q3KND9;Q3KNE0;Q3TR57;Q3U2F8;Q3U2P0;Q3U5G4;Q3UNW8;Q3UU40;Q8HW99 |
| 178 | <b>Wipf1</b>         | 2.41   | 1.09   | 0.45 | 0.00 | WAS/WASL interacting protein family, member 1 [Source:MGI Symbol;Acc:MGI:2178801]                                           | WAS/WASL interacting protein family, member 1 [Source:MGI Symbol;Acc:MGI:2178801]                                           | Q8K1I7;F6QWW7;F6RQI2;Q3THY1;Q6VNB8;A0A1D5RLV7;B7NZ86;G3UY81;G3UYW1;Q6PE56;Q8CHB9                       |
| 179 | <b>Wdfy3</b>         | 3.78   | 1.70   | 0.45 | 0.00 | WD repeat and FYVE domain containing 3 [Source:MGI Symbol;Acc:MGI:1096875]                                                  | WD repeat and FYVE domain containing 3 [Source:MGI Symbol;Acc:MGI:1096875]                                                  | Q6VNB8;A0A1D5RLV7;B7NZ86;G3UY81;G3UYW1;Q6PE56;Q8CHB9                                                   |
| 180 | <b>Slc25a16</b>      | 3.93   | 1.77   | 0.45 | 0.03 | solute carrier family 25 (mitochondrial carrier, Graves disease autoantigen), member 16 [Source:MGI Symbol;Acc:MGI:1920382] | solute carrier family 25 (mitochondrial carrier, Graves disease autoantigen), member 16 [Source:MGI Symbol;Acc:MGI:1920382] | Q8C0K5;D3YVC9                                                                                          |
| 181 | <b>Zfhx2</b>         | 2.61   | 1.17   | 0.45 | 0.02 | zinc finger homeobox 2 [Source:MGI Symbol;Acc:MGI:2686934]                                                                  | zinc finger homeobox 2 [Source:MGI Symbol;Acc:MGI:2686934]                                                                  | Q2MHN3                                                                                                 |
| 182 | <b>4930521O11Rik</b> | 5.95   | 2.68   | 0.45 | 0.00 | predicted gene 2916 [Source:MGI Symbol;Acc:MGI:3781094]                                                                     | predicted gene 2916 [Source:MGI Symbol;Acc:MGI:3781094]                                                                     |                                                                                                        |
| 183 | <b>Kat6a</b>         | 3.94   | 1.77   | 0.45 | 0.00 | K(lysine) acetyltransferase 6A [Source:MGI Symbol;Acc:MGI:2442415]                                                          | K(lysine) acetyltransferase 6A [Source:MGI Symbol;Acc:MGI:2442415]                                                          | Q8BZ21;A0PJC5;G3X940;Q3UFW4;Q3UPM9;Q3V1G6;Q8C6L0                                                       |
| 184 | <b>Larp4</b>         | 3.38   | 1.52   | 0.45 | 0.04 | La ribonucleoprotein domain family, member 4 [Source:MGI Symbol;Acc:MGI:2443114]                                            | La ribonucleoprotein domain family, member 4 [Source:MGI Symbol;Acc:MGI:2443114]                                            | Q8BWW4;A0A2R8VHW8;A0A2R8VKL5;A0A2R8W6Y5;E9Q066;G3X9Q6;Q3T9Z3;Q3UT02                                    |
| 185 | <b>Atf6</b>          | 2.07   | 0.93   | 0.45 | 0.01 | activating transcription factor 6 [Source:MGI Symbol;Acc:MGI:1926157]                                                       | activating transcription factor 6 [Source:MGI Symbol;Acc:MGI:1926157]                                                       | F6VAN0;Q811K9                                                                                          |
| 186 | <b>Fry</b>           | 5.37   | 2.40   | 0.45 | 0.00 | FRY microtubule binding protein [Source:MGI Symbol;Acc:MGI:2443895]                                                         | FRY microtubule binding protein [Source:MGI Symbol;Acc:MGI:2443895]                                                         | E9Q8I9;A0A0J9YTT8;A0A0J9YUP4;A0A0J9YUS4;A0A0J9YVH0;A0A0J9YVI5;Q3TZB0;Q8BIU2;Q8BIX6                     |

|     |                  |       |      |      |      |                                                                                                        |                                                                                                        |                                                                                                                |
|-----|------------------|-------|------|------|------|--------------------------------------------------------------------------------------------------------|--------------------------------------------------------------------------------------------------------|----------------------------------------------------------------------------------------------------------------|
| 187 | <b>Ago1</b>      | 2.54  | 1.14 | 0.45 | 0.00 | argonaute RISC catalytic subunit 1 [Source:MGI Symbol;Acc:MGI:2446630]                                 | argonaute RISC catalytic subunit 1 [Source:MGI Symbol;Acc:MGI:2446630]                                 | Q8CJG1;A2VDG1;H3BJ70;H3BL59;Q8BJP2                                                                             |
| 188 | <b>Rnd1</b>      | 2.57  | 1.15 | 0.45 | 0.01 | Rho family GTPase 1 [Source:MGI Symbol;Acc:MGI:2444878]                                                | Rho family GTPase 1 [Source:MGI Symbol;Acc:MGI:2444878]                                                | Q8BLR7                                                                                                         |
| 189 | <b>Nufip2</b>    | 4.69  | 2.10 | 0.45 | 0.00 | nuclear fragile X mental retardation protein interacting protein 2 [Source:MGI Symbol;Acc:MGI:1915814] | nuclear fragile X mental retardation protein interacting protein 2 [Source:MGI Symbol;Acc:MGI:1915814] | Q5F2E7                                                                                                         |
| 190 | <b>Spsb1</b>     | 3.41  | 1.52 | 0.45 | 0.04 | splA/ryanodine receptor domain and SOCS box containing 1 [Source:MGI Symbol;Acc:MGI:1921896]           | splA/ryanodine receptor domain and SOCS box containing 1 [Source:MGI Symbol;Acc:MGI:1921896]           | Q9D5L7;A2A7B0;A2A7B1;A2A7B2;A2A7B3;E9Q768                                                                      |
| 191 | <b>Phactr2</b>   | 4.68  | 2.09 | 0.45 | 0.00 | phosphatase and actin regulator 2 [Source:MGI Symbol;Acc:MGI:2446138]                                  | phosphatase and actin regulator 2 [Source:MGI Symbol;Acc:MGI:2446138]                                  | A1L3S9;B1AVN9;B1AVP0;F7D4H5;Q3UQ19;Q3UTF8;Q91VK6                                                               |
| 192 | <b>Arhgap26</b>  | 3.53  | 1.57 | 0.45 | 0.00 | Rho GTPase activating protein 26 [Source:MGI Symbol;Acc:MGI:1918552]                                   | Rho GTPase activating protein 26 [Source:MGI Symbol;Acc:MGI:1918552]                                   | Q6ZQ82;A0A087WSU1;B9EJ96;D3Z1X5;E9QAAQ3;F6Q7M1;F6XTB7;F7D661;Q3U860;Q8BIY6;Q8C1Q3;Q9D0J3                       |
| 193 | <b>Crebbp</b>    | 4.57  | 2.04 | 0.45 | 0.00 | CREB binding protein [Source:MGI Symbol;Acc:MGI:1098280]                                               | CREB binding protein [Source:MGI Symbol;Acc:MGI:1098280]                                               | P45481;A0A0U1RP23;A0A0U1RP46;A0A0U1RPL2;A0A0U1RPQ3;A0A0U1RQB6;F8VPR5;Q3V351;Q6GQV9                             |
| 194 | <b>Itrip1</b>    | 0.77  | 0.34 | 0.45 | 0.01 | cilia and flagella associated protein 43 [Source:MGI Symbol;Acc:MGI:1289258]                           | cilia and flagella associated protein 43 [Source:MGI Symbol;Acc:MGI:1289258]                           |                                                                                                                |
| 195 | <b>C1qtnf1</b>   | 2.86  | 1.27 | 0.44 | 0.01 | C1q and tumor necrosis factor related protein 1 [Source:MGI Symbol;Acc:MGI:1919254]                    | C1q and tumor necrosis factor related protein 1 [Source:MGI Symbol;Acc:MGI:1919254]                    | Q9QXP7;A2A4W1;A2A4W2;Q8R1P2                                                                                    |
| 196 | <b>Utrn</b>      | 10.66 | 4.74 | 0.44 | 0.00 | utrophin [Source:MGI Symbol;Acc:MGI:104631]                                                            | utrophin [Source:MGI Symbol;Acc:MGI:104631]                                                            | A0A1W2P6H3;A0A1W2P6L4;A0A1W2P7C0;A0A1W2P8A5;A0A1W2P8G5;E9Q6R7;O08614;Q3TR59;Q3UYS4;Q61636;Q6P6L2;Q810I5;Q811C1 |
| 197 | <b>Tnfrsf10b</b> | 0.83  | 0.37 | 0.44 | 0.00 | tumor necrosis factor, alpha-induced protein 3 [Source:MGI Symbol;Acc:MGI:1196377]                     | tumor necrosis factor, alpha-induced protein 3 [Source:MGI Symbol;Acc:MGI:1196377]                     | Q60769;D3YXE1;D3Z5R6;Q3T9G9;Q3TBB9;Q3U695;Q7TQD1;Q8C2N2                                                        |
| 198 | <b>Ccdc6</b>     | 3.69  | 1.64 | 0.44 | 0.00 | coiled-coil domain containing 6 [Source:MGI Symbol;Acc:MGI:1923801]                                    | coiled-coil domain containing 6 [Source:MGI Symbol;Acc:MGI:1923801]                                    | D3YZP9;F6SXB0;F7B4D5                                                                                           |

|     |                |       |       |      |      |                                                                                                         |                                                                                                         |                                                                                                                          |
|-----|----------------|-------|-------|------|------|---------------------------------------------------------------------------------------------------------|---------------------------------------------------------------------------------------------------------|--------------------------------------------------------------------------------------------------------------------------|
| 199 | <b>Osbp10</b>  | 0.77  | 0.34  | 0.44 | 0.04 | oxysterol binding protein-like 10 [Source:MGI Symbol;Acc:MGI:1921736]                                   | oxysterol binding protein-like 10 [Source:MGI Symbol;Acc:MGI:1921736]                                   | S4R1M9;A0A0R4J0F9;S4R1G3;S4R1L1;S4R296;S4R2S2                                                                            |
| 200 | <b>Plk3</b>    | 4.23  | 1.87  | 0.44 | 0.02 | polo like kinase 3 [Source:MGI Symbol;Acc:MGI:109604]                                                   | polo like kinase 3 [Source:MGI Symbol;Acc:MGI:109604]                                                   | Q60806;F6V5S5;I6L9A2;Q3U0L5;Q6P571                                                                                       |
| 201 | <b>Ddr2</b>    | 0.89  | 0.40  | 0.44 | 0.00 | discoidin domain receptor family, member 2 [Source:MGI Symbol;Acc:MGI:1345277]                          | discoidin domain receptor family, member 2 [Source:MGI Symbol;Acc:MGI:1345277]                          | Q62371;A0A0A6YXY2                                                                                                        |
| 202 | <b>Pitpnm3</b> | 0.93  | 0.41  | 0.44 | 0.00 | PITPNM family member 3 [Source:MGI Symbol;Acc:MGI:2685726]                                              | PITPNM family member 3 [Source:MGI Symbol;Acc:MGI:2685726]                                              | Q3UHE1;Q14DP4                                                                                                            |
| 203 | <b>Tob2</b>    | 32.31 | 14.25 | 0.44 | 0.01 | transducer of ERBB2, 2 [Source:MGI Symbol;Acc:MGI:1888525]                                              | transducer of ERBB2, 2 [Source:MGI Symbol;Acc:MGI:1888525]                                              | Q9JM55;A0A2R8W6W6;Q543X9;Q80TA8;Q8BP12;Q9D6D6                                                                            |
| 204 | <b>Esr1</b>    | 0.69  | 0.31  | 0.44 | 0.04 | estrogen receptor 1 (alpha) [Source:MGI Symbol;Acc:MGI:1352467]                                         | estrogen receptor 1 (alpha) [Source:MGI Symbol;Acc:MGI:1352467]                                         | P19785;A0A1W7GYW9;A0A1W7GYX1;A0A1W7GYY3;A0A1W7GY Y4;B3VQI7;D3Z6V3;E7FJU2;E7FJU3;E7FJU6;Q3UT58;Q3UWN0                     |
| 205 | <b>Mlxip</b>   | 5.88  | 2.59  | 0.44 | 0.02 | MLX interacting protein [Source:MGI Symbol;Acc:MGI:2141183]                                             | MLX interacting protein [Source:MGI Symbol;Acc:MGI:2141183]                                             | Q2VPU4;B2RQ56;F6UPM1;G5E8D8;Q3UPW8;Q80TQ0                                                                                |
| 206 | <b>Tbx5</b>    | 2.44  | 1.07  | 0.44 | 0.00 | T-box 5 [Source:MGI Symbol;Acc:MGI:102541]                                                              | T-box 5 [Source:MGI Symbol;Acc:MGI:102541]                                                              | P70326;A0A0J9YTS5;A0A0J9YUZ8;Q5CZX7;Q8BLK4                                                                               |
| 207 | <b>Prrc2c</b>  | 7.07  | 3.10  | 0.44 | 0.01 | proline-rich coiled-coil 2C [Source:MGI Symbol;Acc:MGI:1913754]                                         | proline-rich coiled-coil 2C [Source:MGI Symbol;Acc:MGI:1913754]                                         | Q3TLH4;A0A0A0MQ79;S4R209;S4R294;S4R298;S4R2E2;S4R2J9;S 4R2L9                                                             |
| 208 | <b>Bcl9l</b>   | 17.06 | 7.49  | 0.44 | 0.00 | B cell CLL/lymphoma 9-like [Source:MGI Symbol;Acc:MGI:1933114]                                          | B cell CLL/lymphoma 9-like [Source:MGI Symbol;Acc:MGI:1933114]                                          | Q67FY2;A0A1W2P7G4;Q99J68                                                                                                 |
| 209 | <b>Usp31</b>   | 1.15  | 0.51  | 0.44 | 0.01 | ubiquitin specific peptidase 31 [Source:MGI Symbol;Acc:MGI:1923429]                                     | ubiquitin specific peptidase 31 [Source:MGI Symbol;Acc:MGI:1923429]                                     | E9Q6Y8;Q3UXX3;Q80TH9;Q3V0C5;A2ALR5;A2ALR8;A2ALR9;A2A LS8;A2ALS9;A2BDP2;B7ZNK5;F6TGT8;F6TH61;F6VSP0;F6VSQ9;F6 Z2T3;F7ALR2 |
| 210 | <b>Aak1</b>    | 2.44  | 1.07  | 0.44 | 0.01 | AP2 associated kinase 1 [Source:MGI Symbol;Acc:MGI:1098687]                                             | AP2 associated kinase 1 [Source:MGI Symbol;Acc:MGI:1098687]                                             |                                                                                                                          |
| 211 | <b>Elov16</b>  | 25.09 | 10.96 | 0.44 | 0.05 | ELOVL family member 6, elongation of long chain fatty acids (yeast) [Source:MGI Symbol;Acc:MGI:2156528] | ELOVL family member 6, elongation of long chain fatty acids (yeast) [Source:MGI Symbol;Acc:MGI:2156528] | Q920L5;A0A0G2JFD6;A0A0G2JFE8;A0A0G2JGX5                                                                                  |

|     |                |       |       |      |      |                                                                                        |                                                                                        |                                                                                                                                                            |
|-----|----------------|-------|-------|------|------|----------------------------------------------------------------------------------------|----------------------------------------------------------------------------------------|------------------------------------------------------------------------------------------------------------------------------------------------------------|
| 212 | <b>Gypc</b>    | 6.74  | 2.94  | 0.44 | 0.02 | glycophorin C [Source:MGI Symbol;Acc:MGI:1098566]                                      | glycophorin C [Source:MGI Symbol;Acc:MGI:1098566]                                      | Q78HU7;F7D1I5;G3UXY6;Q3TRT9                                                                                                                                |
| 213 | <b>Wdr7</b>    | 1.15  | 0.50  | 0.43 | 0.03 | WD repeat domain 7 [Source:MGI Symbol;Acc:MGI:1860197]                                 | WD repeat domain 7 [Source:MGI Symbol;Acc:MGI:1860197]                                 | Q920I9;Q05CF1;Q8C711                                                                                                                                       |
| 214 | <b>Adora1</b>  | 19.01 | 8.25  | 0.43 | 0.00 | adenosine A1 receptor [Source:MGI Symbol;Acc:MGI:99401]                                | adenosine A1 receptor [Source:MGI Symbol;Acc:MGI:99401]                                | Q60612;A0A087WRW7;Q3URG8;Q3UYG0;Q546D0;Q6AXD8;Q8CAH1;Q8R0M5;S5RY33                                                                                         |
| 215 | <b>Ebf1</b>    | 8.63  | 3.75  | 0.43 | 0.00 | early B cell factor 1 [Source:MGI Symbol;Acc:MGI:95275]                                | early B cell factor 1 [Source:MGI Symbol;Acc:MGI:95275]                                | Q07802;Q3UTW6;Q5SWK4;Q5SWK5;Q5SWK8;Q8BSM3;Q8C955;Q8CBL7                                                                                                    |
| 216 | <b>Tbc1d24</b> | 2.03  | 0.88  | 0.43 | 0.04 | TBC1 domain family, member 24 [Source:MGI Symbol;Acc:MGI:2443456]                      | TBC1 domain family, member 24 [Source:MGI Symbol;Acc:MGI:2443456]                      |                                                                                                                                                            |
| 217 | <b>Mef2d</b>   | 30.21 | 13.09 | 0.43 | 0.00 | myocyte enhancer factor 2D [Source:MGI Symbol;Acc:MGI:99533]                           | myocyte enhancer factor 2D [Source:MGI Symbol;Acc:MGI:99533]                           | Q63943;E9Q5E0;E9QKT0;Q3URR2;Q921S6                                                                                                                         |
| 218 | <b>Furin</b>   | 18.80 | 8.15  | 0.43 | 0.01 | furin (paired basic amino acid cleaving enzyme) [Source:MGI Symbol;Acc:MGI:97513]      | furin (paired basic amino acid cleaving enzyme) [Source:MGI Symbol;Acc:MGI:97513]      | P23188;A0A0U1RQ98;D3YTP7;D3Z401                                                                                                                            |
| 219 | <b>Mark2</b>   | 18.54 | 8.02  | 0.43 | 0.01 | MAP/microtubule affinity regulating kinase 2 [Source:MGI Symbol;Acc:MGI:99638]         | MAP/microtubule affinity regulating kinase 2 [Source:MGI Symbol;Acc:MGI:99638]         | Q05512;A0A0R4J0B1;A0A0R4J227;E9PYX3;E9PZ55;E9Q2G8;E9Q2J6;E9Q8H5;E9Q9N6;E9QMP6;F6UY70;F6Z4Q6;F6ZEX4;F6ZS70;F7A3Q3;F7CRG8;F7CVZ7;Q3T9A3;Q3U3A1;Q3UPZ7;Q571J8 |
| 220 | <b>Aff1</b>    | 3.37  | 1.46  | 0.43 | 0.00 | AF4/FMR2 family, member 1 [Source:MGI Symbol;Acc:MGI:1100819]                          | AF4/FMR2 family, member 1 [Source:MGI Symbol;Acc:MGI:1100819]                          | O88573;A3KMF4;B1AVP1;E9Q921;O35233;Q3UP77;Q3UQD9;Q5XM34;Q8CDA0                                                                                             |
| 221 | <b>Heg1</b>    | 14.28 | 6.17  | 0.43 | 0.00 | heart development protein with EGF-like domains 1 [Source:MGI Symbol;Acc:MGI:1924696]  | heart development protein with EGF-like domains 1 [Source:MGI Symbol;Acc:MGI:1924696]  | E9Q7X6;E9Q440;Q6DFX1;Q8BRS4                                                                                                                                |
| 222 | <b>Iffo2</b>   | 2.90  | 1.25  | 0.43 | 0.00 | intermediate filament family orphan 2 [Source:MGI Symbol;Acc:MGI:2140675]              | intermediate filament family orphan 2 [Source:MGI Symbol;Acc:MGI:2140675]              | Q8R2V2;B1AZL1                                                                                                                                              |
| 223 | <b>Setd7</b>   | 3.34  | 1.45  | 0.43 | 0.01 | SET domain containing (lysine methyltransferase) 7 [Source:MGI Symbol;Acc:MGI:1920501] | SET domain containing (lysine methyltransferase) 7 [Source:MGI Symbol;Acc:MGI:1920501] | Q8VHL1                                                                                                                                                     |

|     |                |       |      |      |      |                                                                                                                   |                                                                                                                   |                                                   |
|-----|----------------|-------|------|------|------|-------------------------------------------------------------------------------------------------------------------|-------------------------------------------------------------------------------------------------------------------|---------------------------------------------------|
| 224 | <b>Pik3c2b</b> | 2.30  | 1.00 | 0.43 | 0.00 | phosphatidylinositol-4-phosphate 3-kinase catalytic subunit type 2 beta [Source:MGI Symbol;Acc:MGI:2685045]       | phosphatidylinositol-4-phosphate 3-kinase catalytic subunit type 2 beta [Source:MGI Symbol;Acc:MGI:2685045]       | A2RSK1;D3Z091;E9QAN8                              |
| 225 | <b>Itpkb</b>   | 20.61 | 8.90 | 0.43 | 0.02 | inositol 1,4,5-trisphosphate 3-kinase B [Source:MGI Symbol;Acc:MGI:109235]                                        | inositol 1,4,5-trisphosphate 3-kinase B [Source:MGI Symbol;Acc:MGI:109235]                                        | B2RXC2;Q8BKB2                                     |
| 226 | <b>Bmpr2</b>   | 2.34  | 1.01 | 0.43 | 0.00 | bone morphogenetic protein receptor, type II (serine/threonine kinase) [Source:MGI Symbol;Acc:MGI:1095407]        | bone morphogenetic protein receptor, type II (serine/threonine kinase) [Source:MGI Symbol;Acc:MGI:1095407]        | O35607;Q3UER5;Q3UG09;Q3UU71                       |
| 227 | <b>Rnf122</b>  | 1.91  | 0.82 | 0.43 | 0.01 | ring finger protein 122 [Source:MGI Symbol;Acc:MGI:1916117]                                                       | ring finger protein 122 [Source:MGI Symbol;Acc:MGI:1916117]                                                       | Q8BP31;A0A0R4J0G8                                 |
| 228 | <b>Naif1</b>   | 1.05  | 0.45 | 0.43 | 0.04 | nuclear apoptosis inducing factor 1 [Source:MGI Symbol;Acc:MGI:1918504]                                           | nuclear apoptosis inducing factor 1 [Source:MGI Symbol;Acc:MGI:1918504]                                           | Q6PFD7                                            |
| 229 | <b>Zfp526</b>  | 1.77  | 0.76 | 0.43 | 0.03 | zinc finger protein 526 [Source:MGI Symbol;Acc:MGI:2445181]                                                       | zinc finger protein 526 [Source:MGI Symbol;Acc:MGI:2445181]                                                       | Q8BI66                                            |
| 230 | <b>Cbfa2t3</b> | 11.79 | 5.04 | 0.43 | 0.02 | core-binding factor, runt domain, alpha subunit 2, translocated to, 3 (human) [Source:MGI Symbol;Acc:MGI:1338013] | core-binding factor, runt domain, alpha subunit 2, translocated to, 3 (human) [Source:MGI Symbol;Acc:MGI:1338013] | O54972;B7ZP57;D3Z3P7;E9QM80;Q3UG41                |
| 231 | <b>Zfp316</b>  | 1.67  | 0.72 | 0.43 | 0.00 | zinc finger protein 316 [Source:MGI Symbol;Acc:MGI:1860402]                                                       | zinc finger protein 316 [Source:MGI Symbol;Acc:MGI:1860402]                                                       | Q6PGE4;G3XA34;O35483;Q9WVL8                       |
| 232 | <b>Adrb1</b>   | 7.05  | 3.01 | 0.43 | 0.02 | adrenergic receptor, beta 1 [Source:MGI Symbol;Acc:MGI:87937]                                                     | adrenergic receptor, beta 1 [Source:MGI Symbol;Acc:MGI:87937]                                                     | P34971;Q9CRR2;P25962;H9U0Q5;Q3UP63                |
| 233 | <b>Helz</b>    | 2.02  | 0.86 | 0.43 | 0.00 | helicase with zinc finger domain [Source:MGI Symbol;Acc:MGI:1925705]                                              | helicase with zinc finger domain [Source:MGI Symbol;Acc:MGI:1925705]                                              | Q6DFV5;A0A0R4J0Y3;A2AAU3;A2AAU5;Q6PAR9            |
| 234 | <b>Dvl3</b>    | 7.55  | 3.22 | 0.43 | 0.02 | dishevelled segment polarity protein 3 [Source:MGI Symbol;Acc:MGI:108100]                                         | dishevelled segment polarity protein 3 [Source:MGI Symbol;Acc:MGI:108100]                                         | Q61062;E9Q150;E9Q967;Q571N4                       |
| 235 | <b>Sash1</b>   | 4.03  | 1.72 | 0.43 | 0.01 | SAM and SH3 domain containing 1 [Source:MGI Symbol;Acc:MGI:1917347]                                               | SAM and SH3 domain containing 1 [Source:MGI Symbol;Acc:MGI:1917347]                                               | P59808;A0A1D5RM71;A0A1D5RMH4;F8VQK5;Q6ZQ46;Q8BRY6 |

|     |                |       |      |      |      |                                                                                          |                                                                                          |                                                                                                                                                          |
|-----|----------------|-------|------|------|------|------------------------------------------------------------------------------------------|------------------------------------------------------------------------------------------|----------------------------------------------------------------------------------------------------------------------------------------------------------|
| 236 | <b>Map3k20</b> | 2.93  | 1.25 | 0.43 | 0.00 | Mitogen-Activated Protein Kinase Kinase Kinase 20<br>MGI:2443258                         | Mitogen-Activated Protein Kinase Kinase Kinase 20<br>MGI:2443258                         | Q9ESL4;A2ASW6;Q3TRG2;Q8BUD3                                                                                                                              |
| 237 | <b>Clec2d</b>  | 6.11  | 2.60 | 0.43 | 0.04 | C-type lectin domain family 2, member d [Source:MGI Symbol;Acc:MGI:2135589]              | C-type lectin domain family 2, member d [Source:MGI Symbol;Acc:MGI:2135589]              | Q91V08;F5BFH0                                                                                                                                            |
| 238 | <b>Rnf144b</b> | 1.60  | 0.68 | 0.43 | 0.00 | ring finger protein 144B [Source:MGI Symbol;Acc:MGI:2384986]                             | ring finger protein 144B [Source:MGI Symbol;Acc:MGI:2384986]                             | Q8BKD6                                                                                                                                                   |
| 239 | <b>Clip2</b>   | 7.97  | 3.39 | 0.43 | 0.01 | CAP-GLY domain containing linker protein 2 [Source:MGI Symbol;Acc:MGI:1313136]           | CAP-GLY domain containing linker protein 2 [Source:MGI Symbol;Acc:MGI:1313136]           | Q9Z0H8                                                                                                                                                   |
| 240 | <b>Gm33698</b> | 7.98  | 3.38 | 0.42 | 0.00 | N/A                                                                                      | N/A                                                                                      |                                                                                                                                                          |
| 241 | <b>Rgma</b>    | 4.32  | 1.83 | 0.42 | 0.01 | repulsive guidance molecule family member A [Source:MGI Symbol;Acc:MGI:2679262]          | repulsive guidance molecule family member A [Source:MGI Symbol;Acc:MGI:2679262]          | Q6PCX7;D3Z4W0;Q8C4C4                                                                                                                                     |
| 242 | <b>Prdm2</b>   | 8.75  | 3.70 | 0.42 | 0.00 | PR domain containing 2, with ZNF domain [Source:MGI Symbol;Acc:MGI:107628]               | PR domain containing 2, with ZNF domain [Source:MGI Symbol;Acc:MGI:107628]               | A2A7B5;A2A7B7;B9EKQ3;Q3UWU4;Q80VF3;Q8C2W5                                                                                                                |
| 243 | <b>Samd4b</b>  | 5.47  | 2.32 | 0.42 | 0.01 | sterile alpha motif domain containing 4B [Source:MGI Symbol;Acc:MGI:2448542]             | sterile alpha motif domain containing 4B [Source:MGI Symbol;Acc:MGI:2448542]             | Q80XS6;A0A140LI35;A0A140LIW4;G5E8A7                                                                                                                      |
| 244 | <b>Dip2c</b>   | 1.01  | 0.43 | 0.42 | 0.02 | disco interacting protein 2 homolog C [Source:MGI Symbol;Acc:MGI:1920179]                | disco interacting protein 2 homolog C [Source:MGI Symbol;Acc:MGI:1920179]                | A0A1Y7VMZ0;B2RQ71;B7ZMZ7;E9PWR4;Q5EBR0;Q69ZV2;Q6NY04;Q6PGL8;Q8CBE5;Q9D6I2                                                                                |
| 245 | <b>Plec</b>    | 17.17 | 7.27 | 0.42 | 0.00 | plectin [Source:MGI Symbol;Acc:MGI:1277961]                                              | plectin [Source:MGI Symbol;Acc:MGI:1277961]                                              | Q9QXS1;A0A0B4J1M3;A0A0B4J1M7;A0A0R4J218;A0A0R4J221;A0A0R4J223;E9PW24;E9Q3W4;E9Q9J6;Q05CR3;Q499F9;Q6S385;Q6S387;Q6S388;Q6S390;Q6S392;Q6S393;Q8C8S5;Q923J2 |
| 246 | <b>Bahcc1</b>  | 3.45  | 1.46 | 0.42 | 0.00 | BAH domain and coiled-coil containing 1 [Source:MGI Symbol;Acc:MGI:2679272]              | BAH domain and coiled-coil containing 1 [Source:MGI Symbol;Acc:MGI:2679272]              | Q3UHR0;E9Q7G4;Q3V361                                                                                                                                     |
| 247 | <b>Xpr1</b>    | 1.36  | 0.57 | 0.42 | 0.01 | xenotropic and polytropic retrovirus receptor 1 [Source:MGI Symbol;Acc:MGI:97932]        | xenotropic and polytropic retrovirus receptor 1 [Source:MGI Symbol;Acc:MGI:97932]        | Q9R031;Q9Z0U0;D3Z2B4;E2J868;E2J876;E3VX18;E3VX19;E3VX20;Q8BHF9                                                                                           |
| 248 | <b>Spen</b>    | 7.34  | 3.10 | 0.42 | 0.01 | SPEN homolog, transcriptional regulator (Drosophila) [Source:MGI Symbol;Acc:MGI:1891706] | SPEN homolog, transcriptional regulator (Drosophila) [Source:MGI Symbol;Acc:MGI:1891706] | Q62504;A2ADB0;A2ADB1;Q3UV27;Q0VBL3                                                                                                                       |

|     |                |       |      |      |      |                                                                                              |                                                                                              |                                                         |
|-----|----------------|-------|------|------|------|----------------------------------------------------------------------------------------------|----------------------------------------------------------------------------------------------|---------------------------------------------------------|
| 249 | <b>Pip4k2b</b> | 2.99  | 1.26 | 0.42 | 0.01 | phosphatidylinositol-5-phosphate 4-kinase, type II, beta [Source:MGI Symbol;Acc:MGI:1934234] | phosphatidylinositol-5-phosphate 4-kinase, type II, beta [Source:MGI Symbol;Acc:MGI:1934234] | O70172;A2ASS3;F6RJE8;Q544E3;Q9CZS7;Q80XI4;Q3UJ95;Q91XU2 |
| 250 | <b>Plxna1</b>  | 7.84  | 3.30 | 0.42 | 0.00 | plexin A1 [Source:MGI Symbol;Acc:MGI:107685]                                                 | plexin A1 [Source:MGI Symbol;Acc:MGI:107685]                                                 | P70206;A0A0N4SUU1;A0A0N4SW74;Q3U3W7                     |
| 251 | <b>Thy1</b>    | 2.88  | 1.21 | 0.42 | 0.01 | thymus cell antigen 1, theta [Source:MGI Symbol;Acc:MGI:98747]                               | thymus cell antigen 1, theta [Source:MGI Symbol;Acc:MGI:98747]                               | P01831;A0A1L1SR57;A0A1L1ST40;A0A1L1SUX8;Q53YX2          |
| 252 | <b>Gm34003</b> | 5.02  | 2.11 | 0.42 | 0.00 | predicted gene 34003[Source:MGI Symbol;Acc:MGI:5593162 ]                                     | predicted gene 34003[Source:MGI Symbol;Acc:MGI:5593162 ]                                     |                                                         |
| 253 | <b>Diap2</b>   | 2.18  | 0.92 | 0.42 | 0.00 | Diaphanous Related Formin 2 MGI:1858500                                                      | Diaphanous Related Formin 2 MGI:1858500                                                      | O70566;E9Q4U7;K4PWM5;Q3U4Y4;Q496P2;Q6W4W7;Q8C414        |
| 254 | <b>Foxo1</b>   | 4.65  | 1.95 | 0.42 | 0.00 | forkhead box O1 [Source:MGI Symbol;Acc:MGI:1890077]                                          | forkhead box O1 [Source:MGI Symbol;Acc:MGI:1890077]                                          | Q9R1E0;Q8BPP2;Q8BRS7;Q8CA93;Q9WVH5                      |
| 255 | <b>Sowahc</b>  | 2.70  | 1.13 | 0.42 | 0.01 | sosondowah ankyrin repeat domain family member C [Source:MGI Symbol;Acc:MGI:3606051]         | sosondowah ankyrin repeat domain family member C [Source:MGI Symbol;Acc:MGI:3606051]         | Q8C0J6                                                  |
| 256 | <b>Dag1</b>    | 13.05 | 5.45 | 0.42 | 0.01 | dystroglycan 1 [Source:MGI Symbol;Acc:MGI:101864]                                            | dystroglycan 1 [Source:MGI Symbol;Acc:MGI:101864]                                            | Q62165;A0A0A6YW41;A0A0A6YXB6;Q544G5;Q8BPJ7;Q8CBE6       |
| 257 | <b>Sntb1</b>   | 2.25  | 0.94 | 0.42 | 0.01 | syntrophin, basic 1 [Source:MGI Symbol;Acc:MGI:101781]                                       | syntrophin, basic 1 [Source:MGI Symbol;Acc:MGI:101781]                                       | Q99L88                                                  |
| 258 | <b>Col28a1</b> | 0.90  | 0.38 | 0.42 | 0.00 | collagen, type XXVIII, alpha 1 [Source:MGI Symbol;Acc:MGI:2685312]                           | collagen, type XXVIII, alpha 1 [Source:MGI Symbol;Acc:MGI:2685312]                           | Q2UY11;A0A1L1SSY2                                       |
| 259 | <b>Ddi2</b>    | 5.04  | 2.10 | 0.42 | 0.00 | DNA-damage inducible protein 2 [Source:MGI Symbol;Acc:MGI:1917244]                           | DNA-damage inducible protein 2 [Source:MGI Symbol;Acc:MGI:1917244]                           |                                                         |
| 260 | <b>Vasn</b>    | 3.68  | 1.53 | 0.42 | 0.00 | vasorin [Source:MGI Symbol;Acc:MGI:2177651]                                                  | vasorin [Source:MGI Symbol;Acc:MGI:2177651]                                                  | Q9CZT5                                                  |

|     |                      |       |      |      |      |                                                                                                             |                                                                                                             |                                                                                                                  |
|-----|----------------------|-------|------|------|------|-------------------------------------------------------------------------------------------------------------|-------------------------------------------------------------------------------------------------------------|------------------------------------------------------------------------------------------------------------------|
| 261 | <b>Heyl</b>          | 5.78  | 2.40 | 0.42 | 0.01 | hairy/enhancer-of-split related with YRPW motif-like [Source:MGI Symbol;Acc:MGI:1860511]                    | hairy/enhancer-of-split related with YRPW motif-like [Source:MGI Symbol;Acc:MGI:1860511]                    | Q9DBX7                                                                                                           |
| 262 | <b>Ncor2</b>         | 14.14 | 5.87 | 0.41 | 0.00 | nuclear receptor co-repressor 2 [Source:MGI Symbol;Acc:MGI:1337080]                                         | nuclear receptor co-repressor 2 [Source:MGI Symbol;Acc:MGI:1337080]                                         | Q9WU42;A0A0G2JED1;A0A0G2JEQ5;D3Z2J5;E9PY55;E9Q701;E9Q9V3;F6SK53;F6YAU7;F6Z4B2;F8VQL9;Q3TG88;Q3TTT3;Q3TZ10;Q80ZV7 |
| 263 | <b>Fam53b</b>        | 10.43 | 4.32 | 0.41 | 0.01 | family with sequence similarity 53, member B [Source:MGI Symbol;Acc:MGI:1925188]                            | family with sequence similarity 53, member B [Source:MGI Symbol;Acc:MGI:1925188]                            | Q8BGR5;D3YXR6;D3Z4V7;Q3TNT2;Q3U0R8                                                                               |
| 264 | <b>Tiam1</b>         | 1.15  | 0.48 | 0.41 | 0.01 | T cell lymphoma invasion and metastasis 1 [Source:MGI Symbol;Acc:MGI:103306]                                | T cell lymphoma invasion and metastasis 1 [Source:MGI Symbol;Acc:MGI:103306]                                | Q60610;E9Q1R7;E9Q2Y4;G3UWG2;J3QMH1;J3QQ55;Q3TQ81;Q3TRA4;Q3UHH6;Q3UVX2;Q6P1D6                                     |
| 265 | <b>Insr</b>          | 4.36  | 1.80 | 0.41 | 0.01 | insulin receptor [Source:MGI Symbol;Acc:MGI:96575]                                                          | insulin receptor [Source:MGI Symbol;Acc:MGI:96575]                                                          | P15208;A0A140LI30;B8Q3N4;M4TKR7;Q3TPM5;Q3V2X8;Q3V313                                                             |
| 266 | <b>Arhgap35</b>      | 4.11  | 1.69 | 0.41 | 0.01 | Rho GTPase activating protein 35 [Source:MGI Symbol;Acc:MGI:1929494]                                        | Rho GTPase activating protein 35 [Source:MGI Symbol;Acc:MGI:1929494]                                        | Q91YM2;B2RTN5;Q3TSU7;Q3UVZ8;Q5U612;Q8CCL8                                                                        |
| 267 | <b>Usf3</b>          | 1.62  | 0.67 | 0.41 | 0.00 | upstream transcription factor family member 3 MGI:2685454                                                   | upstream transcription factor family member 3 MGI:2685454                                                   | B2RUQ2;F8WJI0                                                                                                    |
| 268 | <b>Ccr10</b>         | 12.17 | 5.02 | 0.41 | 0.03 | chemokine (C-C motif) receptor 10 [Source:MGI Symbol;Acc:MGI:1096320]                                       | chemokine (C-C motif) receptor 10 [Source:MGI Symbol;Acc:MGI:1096320]                                       | Q9JL21;O08707;A0A1L1ST82;A0A1L1SV85;Q2V6T2;Q924I3;B2RU75;Q8BYE1                                                  |
| 269 | <b>Rbm33</b>         | 5.64  | 2.32 | 0.41 | 0.00 | RNA binding motif protein 33 [Source:MGI Symbol;Acc:MGI:1919670]                                            | RNA binding motif protein 33 [Source:MGI Symbol;Acc:MGI:1919670]                                            | Q9CXX9;D3YV48;D3Z5I9;F6RNF9;F6Y0Q7;Q3TZR3                                                                        |
| 270 | <b>5430427O19Rik</b> | 0.75  | 0.31 | 0.41 | 0.02 | RIKEN cDNA 5430427O19 gene [Source:MGI Symbol;Acc:MGI:1918648]                                              | RIKEN cDNA 5430427O19 gene [Source:MGI Symbol;Acc:MGI:1918648]                                              | Q9D3J9;Q08EG0                                                                                                    |
| 271 | <b>MIlt1</b>         | 5.79  | 2.38 | 0.41 | 0.02 | myeloid/lymphoid or mixed-lineage leukemia; translocated to, 1 [Source:MGI Symbol;Acc:MGI:1927238]          | myeloid/lymphoid or mixed-lineage leukemia; translocated to, 1 [Source:MGI Symbol;Acc:MGI:1927238]          | A4VCJ2;Q9EPX7;Q9ERL0;P54841;Q3V2C2                                                                               |
| 272 | <b>Maib</b>          | 3.78  | 1.56 | 0.41 | 0.00 | v-maf musculoaponeurotic fibrosarcoma oncogene family, protein B (avian) [Source:MGI Symbol;Acc:MGI:104555] | v-maf musculoaponeurotic fibrosarcoma oncogene family, protein B (avian) [Source:MGI Symbol;Acc:MGI:104555] | P54841;Q3V2C2                                                                                                    |

|     |                |       |       |      |      |                                                                                                      |                                                                                                      |                                                                                                                            |
|-----|----------------|-------|-------|------|------|------------------------------------------------------------------------------------------------------|------------------------------------------------------------------------------------------------------|----------------------------------------------------------------------------------------------------------------------------|
| 273 | <b>Zyg11b</b>  | 1.71  | 0.70  | 0.41 | 0.00 | zyg-II family member B, cell cycle regulator [Source:MGI Symbol;Acc:MGI:2685277]                     | zyg-II family member B, cell cycle regulator [Source:MGI Symbol;Acc:MGI:2685277]                     | Q3UFS0                                                                                                                     |
| 274 | <b>Rasgrf2</b> | 1.03  | 0.42  | 0.41 | 0.03 | RAS protein-specific guanine nucleotide-releasing factor 2 [Source:MGI Symbol;Acc:MGI:109137]        | RAS protein-specific guanine nucleotide-releasing factor 2 [Source:MGI Symbol;Acc:MGI:109137]        | P70392;A0A1L1SS23;D3Z685;D3Z6K8;F6TCD3;F6TYF8;F7B9R2                                                                       |
| 275 | <b>Bicra</b>   | 5.09  | 2.07  | 0.41 | 0.00 | BRD4 interacting chromatin remodeling complex associated protein [Source:MGI Symbol;Acc:MGI:2154263] | BRD4 interacting chromatin remodeling complex associated protein [Source:MGI Symbol;Acc:MGI:2154263] | F8VPZ9;Q571B1                                                                                                              |
| 276 | <b>Hspa12a</b> | 3.06  | 1.24  | 0.41 | 0.00 | heat shock protein 12A [Source:MGI Symbol;Acc:MGI:1920692]                                           | heat shock protein 12A [Source:MGI Symbol;Acc:MGI:1920692]                                           | Q8K0U4;Q3TNR3                                                                                                              |
| 277 | <b>Map2k6</b>  | 0.97  | 0.40  | 0.41 | 0.01 | mitogen-activated protein kinase kinase 6 [Source:MGI Symbol;Acc:MGI:1346870]                        | mitogen-activated protein kinase kinase 6 [Source:MGI Symbol;Acc:MGI:1346870]                        | P70236;A2AGS2;P70273;Q3UU57;Q543Z5;Q60521;Q8BP44                                                                           |
| 278 | <b>Wdtdc1</b>  | 12.58 | 5.11  | 0.41 | 0.01 | WD and tetratricopeptide repeats 1 [Source:MGI Symbol;Acc:MGI:2685541]                               | WD and tetratricopeptide repeats 1 [Source:MGI Symbol;Acc:MGI:2685541]                               | Q80ZK9;A2AE98;Q3TRY0;Q8JZZ2                                                                                                |
| 279 | <b>Ppard</b>   | 10.97 | 4.45  | 0.41 | 0.01 | peroxisome proliferator activator receptor delta [Source:MGI Symbol;Acc:MGI:101884]                  | peroxisome proliferator activator receptor delta [Source:MGI Symbol;Acc:MGI:101884]                  | P35396;E9PV57;Q546I3;Q7TSY1                                                                                                |
| 280 | <b>Shank3</b>  | 29.07 | 11.77 | 0.40 | 0.00 | SH3 and multiple ankyrin repeat domains 3 [Source:MGI Symbol;Acc:MGI:1930016]                        | SH3 and multiple ankyrin repeat domains 3 [Source:MGI Symbol;Acc:MGI:1930016]                        | Q4ACU6;A0A088DEG0;A0A088DEG1;A0A088DEG2;A0A088DEG3;A0A088DEG5;A0A088DEG6;A0A0A0MQD5;A0A2R8VH81;E9Q1P5;F8S0X7;F8S0X8;F8S0X9 |
| 281 | <b>Ptpn11</b>  | 12.80 | 5.18  | 0.40 | 0.00 | protein tyrosine phosphatase, non-receptor type 11 [Source:MGI Symbol;Acc:MGI:99511]                 | protein tyrosine phosphatase, non-receptor type 11 [Source:MGI Symbol;Acc:MGI:99511]                 | P35235;Q05C78;Q63848;Q9CT18                                                                                                |
| 282 | <b>Hmbox1</b>  | 3.24  | 1.31  | 0.40 | 0.00 | homeobox containing 1 [Source:MGI Symbol;Acc:MGI:2445066]                                            | homeobox containing 1 [Source:MGI Symbol;Acc:MGI:2445066]                                            | Q8BJA3;H3BJ31;H3BK13;H3BK67;H3BKF8;H3BKM3;H3BL55;Q3TR65;Q3TT45                                                             |
| 283 | <b>Rab2b</b>   | 1.93  | 0.78  | 0.40 | 0.03 | RAB2B, member RAS oncogene family [Source:MGI Symbol;Acc:MGI:1923588]                                | RAB2B, member RAS oncogene family [Source:MGI Symbol;Acc:MGI:1923588]                                | P59279;G3UXQ7;G3UZ24;G3V022;Q0PD64;Q3TEG7;Q5U628;Q6P7T7;Q9DB48                                                             |
| 284 | <b>Iqsec1</b>  | 17.62 | 7.10  | 0.40 | 0.00 | IQ motif and Sec7 domain 1 [Source:MGI Symbol;Acc:MGI:1196356]                                       | IQ motif and Sec7 domain 1 [Source:MGI Symbol;Acc:MGI:1196356]                                       | Q8R0S2;A0A0R4J1U6;A0A1D5RM83;E9PUA3;Q8C8Q0                                                                                 |

|     |                |       |      |      |      |                                                                                                    |                                                                                                    |                                                                                 |
|-----|----------------|-------|------|------|------|----------------------------------------------------------------------------------------------------|----------------------------------------------------------------------------------------------------|---------------------------------------------------------------------------------|
| 285 | <b>Hr</b>      | 7.59  | 3.05 | 0.40 | 0.00 | hairless [Source:MGI<br>Symbol;Acc:MGI:96223]                                                      | hairless [Source:MGI<br>Symbol;Acc:MGI:96223]                                                      | Q61645;E9PZ81;Q4QY90                                                            |
| 286 | <b>Gm7265</b>  | 0.82  | 0.33 | 0.40 | 0.00 | predicted gene 7265<br>[Source:MGI<br>Symbol;Acc:MGI:3648991]                                      | predicted gene 7265<br>[Source:MGI<br>Symbol;Acc:MGI:3648991]                                      |                                                                                 |
| 287 | <b>Vgll4</b>   | 11.09 | 4.45 | 0.40 | 0.01 | vestigial like family member 4<br>[Source:MGI<br>Symbol;Acc:MGI:2652840]                           | vestigial like family member 4<br>[Source:MGI<br>Symbol;Acc:MGI:2652840]                           | Q80V24;D3YZY3;D3Z130;Q3TQI9;Q3TSJ2                                              |
| 288 | <b>Calr4</b>   | 0.81  | 0.32 | 0.40 | 0.01 | calreticulin 4 [Source:MGI<br>Symbol;Acc:MGI:2140435]                                              | calreticulin 4 [Source:MGI<br>Symbol;Acc:MGI:2140435]                                              | A2A8Z3;G5CPP0;Q3TQS0                                                            |
| 289 | <b>Khsrp</b>   | 10.05 | 4.02 | 0.40 | 0.00 | KH-type splicing regulatory<br>protein [Source:MGI<br>Symbol;Acc:MGI:1336214]                      | KH-type splicing regulatory<br>protein [Source:MGI<br>Symbol;Acc:MGI:1336214]                      | Q3U0V1;Q8CEN4                                                                   |
| 290 | <b>Trim56</b>  | 3.47  | 1.39 | 0.40 | 0.02 | tripartite motif-containing 56<br>[Source:MGI<br>Symbol;Acc:MGI:2685298]                           | tripartite motif-containing 56<br>[Source:MGI<br>Symbol;Acc:MGI:2685298]                           | Q80VI1;A0A0R4J0Q6;D3YVX5                                                        |
| 291 | <b>Tmem201</b> | 4.32  | 1.73 | 0.40 | 0.01 | transmembrane protein 201<br>[Source:MGI<br>Symbol;Acc:MGI:1196277]                                | transmembrane protein 201<br>[Source:MGI<br>Symbol;Acc:MGI:1196277]                                | A2A8U2;Q3TXY3;Q8C397;Q8C9U2                                                     |
| 292 | <b>Wasf2</b>   | 14.22 | 5.67 | 0.40 | 0.00 | WAS protein family, member 2<br>[Source:MGI<br>Symbol;Acc:MGI:1098641]                             | WAS protein family, member 2<br>[Source:MGI<br>Symbol;Acc:MGI:1098641]                             | Q8BH43;B1AUN0;Q3T9Z7;Q3U3E7;Q80UQ8;Q8BZD7                                       |
| 293 | <b>Cyr61</b>   | 23.00 | 9.17 | 0.40 | 0.00 | cysteine rich protein 61<br>[Source:MGI<br>Symbol;Acc:MGI:88613]                                   | cysteine rich protein 61<br>[Source:MGI<br>Symbol;Acc:MGI:88613]                                   | P18406;Q3TX21                                                                   |
| 294 | <b>Irgq</b>    | 1.84  | 0.73 | 0.40 | 0.03 | immunity-related GTPase<br>family, Q [Source:MGI<br>Symbol;Acc:MGI:2667176]                        | immunity-related GTPase<br>family, Q [Source:MGI<br>Symbol;Acc:MGI:2667176]                        | Q8VIM9;;Q3ULY1;Q5NCB2;Q8R5D8                                                    |
| 295 | <b>Pum1</b>    | 2.42  | 0.96 | 0.40 | 0.01 | pumilio RNA-binding family<br>member 1 [Source:MGI<br>Symbol;Acc:MGI:1931749]                      | pumilio RNA-binding family<br>member 1 [Source:MGI<br>Symbol;Acc:MGI:1931749]                      | Q80U78;A8WHM8;E9Q6M7;Q3TQ21;Q3TRI4;Q3TTW5;Q3U4T5;<br>Q3UHW0;Q3UR00              |
| 296 | <b>Tacc1</b>   | 11.90 | 4.70 | 0.39 | 0.00 | transforming, acidic coiled-coil<br>containing protein 1<br>[Source:MGI<br>Symbol;Acc:MGI:2443510] | transforming, acidic coiled-coil<br>containing protein 1<br>[Source:MGI<br>Symbol;Acc:MGI:2443510] | Q6Y685;A0A1B0GR30;A0A1B0GRF4;A0A1B0GRH3;A0A1B0GRI7;<br>A0A1B0GSC1;F8VQ95;Q3UUD7 |
| 297 | <b>Cd93</b>    | 9.09  | 3.59 | 0.39 | 0.01 | CD93 antigen [Source:MGI<br>Symbol;Acc:MGI:106664]                                                 | CD93 antigen [Source:MGI<br>Symbol;Acc:MGI:106664]                                                 | O89103                                                                          |

|     |                 |       |       |      |      |                                                                                                            |                                                                                                            |                                                                                                                             |
|-----|-----------------|-------|-------|------|------|------------------------------------------------------------------------------------------------------------|------------------------------------------------------------------------------------------------------------|-----------------------------------------------------------------------------------------------------------------------------|
| 298 | <b>Ttpal</b>    | 1.80  | 0.71  | 0.39 | 0.01 | tocopherol (alpha) transfer protein-like [Source:MGI Symbol;Acc:MGI:1923330]                               | tocopherol (alpha) transfer protein-like [Source:MGI Symbol;Acc:MGI:1923330]                               | Q9D3D0;A2A5I7;A6PW50                                                                                                        |
| 299 | <b>Snx27</b>    | 3.15  | 1.24  | 0.39 | 0.00 | sorting nexin family member 27 [Source:MGI Symbol;Acc:MGI:1923992]                                         | sorting nexin family member 27 [Source:MGI Symbol;Acc:MGI:1923992]                                         | Q3UHD6;A0A0G2JF85;A0A0G2JG07;A0A0G2JGD5;Q8BYM0                                                                              |
| 300 | <b>AU040096</b> | 3.86  | 1.52  | 0.39 | 0.00 | N/A                                                                                                        | N/A                                                                                                        | Q3UTB4;Q3UTB4                                                                                                               |
| 301 | <b>Syngap1</b>  | 1.82  | 0.71  | 0.39 | 0.04 | synaptic Ras GTPase activating protein 1 homolog (rat) [Source:MGI Symbol;Acc:MGI:3039785]                 | synaptic Ras GTPase activating protein 1 homolog (rat) [Source:MGI Symbol;Acc:MGI:3039785]                 | F6SEU4;A0A0A6YVS6;A0A0J9YUM2;A0A0J9YUY7;A0A0J9YUZ2;A0A0J9YUZ5;A0A0J9YV63;A0A0J9YVH8;A0A140T8K9;A0A2R8VH83;A0A2R8VHH2;J3QQ18 |
| 302 | <b>Arhgap32</b> | 1.86  | 0.73  | 0.39 | 0.01 | Rho GTPase activating protein 32 [Source:MGI Symbol;Acc:MGI:2450166]                                       | Rho GTPase activating protein 32 [Source:MGI Symbol;Acc:MGI:2450166]                                       | Q811P8;I7HFI3;Q3US80;S4R2C0;S4R2G6                                                                                          |
| 303 | <b>Fos</b>      | 1.26  | 0.49  | 0.39 | 0.03 | FBJ osteosarcoma oncogene [Source:MGI Symbol;Acc:MGI:95574]                                                | FBJ osteosarcoma oncogene [Source:MGI Symbol;Acc:MGI:95574]                                                | P01101;Q3U463;Q6TDG4                                                                                                        |
| 304 | <b>Crtc3</b>    | 2.36  | 0.92  | 0.39 | 0.01 | CREB regulated transcription coactivator 3 [Source:MGI Symbol;Acc:MGI:1917711]                             | CREB regulated transcription coactivator 3 [Source:MGI Symbol;Acc:MGI:1917711]                             | Q91X84;F6UMS9;F6Y626                                                                                                        |
| 305 | <b>Rassf2</b>   | 1.35  | 0.53  | 0.39 | 0.01 | Ras association (RalGDS/AF-6) domain family member 2 [Source:MGI Symbol;Acc:MGI:2442060]                   | Ras association (RalGDS/AF-6) domain family member 2 [Source:MGI Symbol;Acc:MGI:2442060]                   | Q8BMS9;A2APB1;A2AVI0                                                                                                        |
| 306 | <b>Dach1</b>    | 2.02  | 0.78  | 0.39 | 0.00 | dachshund 1 (Drosophila) [Source:MGI Symbol;Acc:MGI:1277991]                                               | dachshund 1 (Drosophila) [Source:MGI Symbol;Acc:MGI:1277991]                                               | Q9QYB2;Q3UTV2;Q68G54;Q80WU5                                                                                                 |
| 307 | <b>Ppargc1b</b> | 30.42 | 11.72 | 0.39 | 0.01 | peroxisome proliferative activated receptor, gamma, coactivator 1 beta [Source:MGI Symbol;Acc:MGI:2444934] | peroxisome proliferative activated receptor, gamma, coactivator 1 beta [Source:MGI Symbol;Acc:MGI:2444934] | Q8VHJ7;B2RWT8                                                                                                               |
| 308 | <b>Prkce</b>    | 3.30  | 1.27  | 0.38 | 0.01 | protein kinase C, epsilon [Source:MGI Symbol;Acc:MGI:97599]                                                | protein kinase C, epsilon [Source:MGI Symbol;Acc:MGI:97599]                                                | P16054;Q8C944                                                                                                               |
| 309 | <b>Nf2</b>      | 17.02 | 6.54  | 0.38 | 0.01 | neurofibromin 2 [Source:MGI Symbol;Acc:MGI:97307]                                                          | neurofibromin 2 [Source:MGI Symbol;Acc:MGI:97307]                                                          | P46662;E9PW99;E9Q7I0;F6X089;F7D6P2;F7DBY2;F8WJ43;Q3TIW4;Q62207;Q99K59;Q9D3K3                                                |

|     |                 |        |       |      |      |                                                                                        |                                                                                        |                                                                                     |
|-----|-----------------|--------|-------|------|------|----------------------------------------------------------------------------------------|----------------------------------------------------------------------------------------|-------------------------------------------------------------------------------------|
| 310 | <b>Creb3l2</b>  | 2.06   | 0.79  | 0.38 | 0.02 | cAMP responsive element binding protein 3-like 2 [Source:MGI Symbol;Acc:MGI:2442695]   | cAMP responsive element binding protein 3-like 2 [Source:MGI Symbol;Acc:MGI:2442695]   | Q8BH52;Q922T5                                                                       |
| 311 | <b>Ern1</b>     | 1.04   | 0.40  | 0.38 | 0.00 | endoplasmic reticulum (ER) to nucleus signalling 1 [Source:MGI Symbol;Acc:MGI:1930134] | endoplasmic reticulum (ER) to nucleus signalling 1 [Source:MGI Symbol;Acc:MGI:1930134] | Q9EQY0;B1ARJ5;B1ATQ7;Q3TBZ5                                                         |
| 312 | <b>Gsap</b>     | 0.92   | 0.35  | 0.38 | 0.01 | gamma-secretase activating protein [Source:MGI Symbol;Acc:MGI:2442259]                 | gamma-secretase activating protein [Source:MGI Symbol;Acc:MGI:2442259]                 | Q3TCV3;A0A0G2JDY7;A0A0G2JE19;A0A0G2JF17;A0A0G2JGX8                                  |
| 313 | <b>Tcf20</b>    | 5.22   | 2.00  | 0.38 | 0.00 | transcription factor 20 [Source:MGI Symbol;Acc:MGI:108399]                             | transcription factor 20 [Source:MGI Symbol;Acc:MGI:108399]                             | Q9EPQ8;A0A2R8VHC6;A0A2R8VKG9;A0A2R8W6K2;Q3U8L8;Q66JM6;Q80U46                        |
| 314 | <b>Bcl6b</b>    | 11.81  | 4.48  | 0.38 | 0.00 | B cell CLL/lymphoma 6, member B [Source:MGI Symbol;Acc:MGI:1278332]                    | B cell CLL/lymphoma 6, member B [Source:MGI Symbol;Acc:MGI:1278332]                    | O88282;A2CF73;Q3U0M5;Q5BKP3                                                         |
| 315 | <b>Slc25a42</b> | 149.01 | 56.38 | 0.38 | 0.01 | solute carrier family 25, member 42 [Source:MGI Symbol;Acc:MGI:1920345]                | solute carrier family 25, member 42 [Source:MGI Symbol;Acc:MGI:1920345]                | Q8R0Y8                                                                              |
| 316 | <b>Nrarp</b>    | 8.88   | 3.36  | 0.38 | 0.01 | Notch-regulated ankyrin repeat protein [Source:MGI Symbol;Acc:MGI:1914372]             | Notch-regulated ankyrin repeat protein [Source:MGI Symbol;Acc:MGI:1914372]             | Q91ZA8                                                                              |
| 317 | <b>Hapln4</b>   | 1.20   | 0.45  | 0.38 | 0.00 | hyaluronan and proteoglycan link protein 4 [Source:MGI Symbol;Acc:MGI:2679531]         | hyaluronan and proteoglycan link protein 4 [Source:MGI Symbol;Acc:MGI:2679531]         | Q80WM4                                                                              |
| 318 | <b>Ubxn7</b>    | 2.13   | 0.80  | 0.38 | 0.02 | UBX domain protein 7 [Source:MGI Symbol;Acc:MGI:2146388]                               | UBX domain protein 7 [Source:MGI Symbol;Acc:MGI:2146388]                               | Q6P5G6;G5E8R8;Q3UGV7                                                                |
| 319 | <b>Hmcn2</b>    | 2.54   | 0.96  | 0.38 | 0.00 | hemicentin 2 [Source:MGI Symbol;Acc:MGI:2677838]                                       | hemicentin 2 [Source:MGI Symbol;Acc:MGI:2677838]                                       | A2AJ76;A0A2I3BRN3;F6VSY0                                                            |
| 320 | <b>Msmpl</b>    | 10.14  | 3.81  | 0.38 | 0.01 | microseminoprotein, prostate associated [Source:MGI Symbol;Acc:MGI:3652339]            | microseminoprotein, prostate associated [Source:MGI Symbol;Acc:MGI:3652339]            | B1AWI6                                                                              |
| 321 | <b>Pdplk1</b>   | 1.72   | 0.65  | 0.38 | 0.01 | 3-phosphoinositide dependent protein kinase 1 [Source:MGI Symbol;Acc:MGI:1338068]      | 3-phosphoinositide dependent protein kinase 1 [Source:MGI Symbol;Acc:MGI:1338068]      | Q9Z2A0;F2Z3V6;F2Z3X6;F2Z3X9;F2Z3Z9;F2Z400;F2Z4A5;Q3TRL2;Q3UEW8;Q3UGN6;Q3UHZ0;Q8K3L3 |

|     |                |       |      |      |      |                                                                                        |                                                                                        |                                                  |
|-----|----------------|-------|------|------|------|----------------------------------------------------------------------------------------|----------------------------------------------------------------------------------------|--------------------------------------------------|
| 322 | <b>Midn</b>    | 16.17 | 6.06 | 0.38 | 0.01 | midnolin [Source:MGI Symbol;Acc:MGI:1890222]                                           | midnolin [Source:MGI Symbol;Acc:MGI:1890222]                                           | Q3TPJ7;D3YYX7;D3YZI7;D3Z1J8;D3Z7H2               |
| 323 | <b>Lrp6</b>    | 5.33  | 2.00 | 0.37 | 0.00 | low density lipoprotein receptor-related protein 6 [Source:MGI Symbol;Acc:MGI:1298218] | low density lipoprotein receptor-related protein 6 [Source:MGI Symbol;Acc:MGI:1298218] | O88572;A0A0N4SUL9;A0A0R4JOA9;Q3TS86;Q3US54       |
| 324 | <b>Rxra</b>    | 11.16 | 4.18 | 0.37 | 0.01 | retinoid X receptor alpha [Source:MGI Symbol;Acc:MGI:98214]                            | retinoid X receptor alpha [Source:MGI Symbol;Acc:MGI:98214]                            | P28700;A2AJP1;A2AJP2;Q3UMU4;Q6LC96               |
| 325 | <b>Cd300lh</b> | 1.72  | 0.64 | 0.37 | 0.02 | CD300 molecule like family member D3 [Source:MGI Symbol;Acc:MGI:2687214]               | CD300 molecule like family member D3 [Source:MGI Symbol;Acc:MGI:2687214]               | Q6SIQ5                                           |
| 326 | <b>Tmem179</b> | 3.74  | 1.40 | 0.37 | 0.02 | transmembrane protein 179 [Source:MGI Symbol;Acc:MGI:2144891]                          | transmembrane protein 179 [Source:MGI Symbol;Acc:MGI:2144891]                          | Q8BHH9;A0A1Y7VM43                                |
| 327 | <b>Rnf152</b>  | 3.42  | 1.28 | 0.37 | 0.02 | ring finger protein 152 [Source:MGI Symbol;Acc:MGI:2443787]                            | ring finger protein 152 [Source:MGI Symbol;Acc:MGI:2443787]                            | Q8BG47                                           |
| 328 | <b>Med13l</b>  | 4.40  | 1.64 | 0.37 | 0.01 | mediator complex subunit 13-like [Source:MGI Symbol;Acc:MGI:2670178]                   | mediator complex subunit 13-like [Source:MGI Symbol;Acc:MGI:2670178]                   | Q6JPI3;A0A0J9YUA8;E9QLJ3;Q3TDJ7;Q6GQS5;Q8C2D6    |
| 329 | <b>Gtf2a1</b>  | 3.64  | 1.35 | 0.37 | 0.00 | general transcription factor II A, 1 [Source:MGI Symbol;Acc:MGI:1933277]               | general transcription factor II A, 1 [Source:MGI Symbol;Acc:MGI:1933277]               | Q99PM3;Q0VGZ0;Q149E9;Q3USX2                      |
| 330 | <b>Tnrc18</b>  | 6.68  | 2.48 | 0.37 | 0.00 | trinucleotide repeat containing 18 [Source:MGI Symbol;Acc:MGI:3648294]                 | trinucleotide repeat containing 18 [Source:MGI Symbol;Acc:MGI:3648294]                 | Q80WC3;A0A0G2JFH8;D3YV17;F6Z7L1;Q52KG0           |
| 331 | <b>Tmem8b</b>  | 4.36  | 1.62 | 0.37 | 0.02 | transmembrane protein 8B [Source:MGI Symbol;Acc:MGI:2441680]                           | transmembrane protein 8B [Source:MGI Symbol;Acc:MGI:2441680]                           | B1AWJ5;B1AWJ4;E9Q7V8                             |
| 332 | <b>Fam63b</b>  | 3.42  | 1.26 | 0.37 | 0.01 | MINDY lysine 48 deubiquitinase 2 [Source:MGI Symbol;Acc:MGI:2443086]                   | MINDY lysine 48 deubiquitinase 2 [Source:MGI Symbol;Acc:MGI:2443086]                   | Q6PDI6;A0A1L1STF0;Q3UMW4                         |
| 333 | <b>Tmem104</b> | 2.85  | 1.05 | 0.37 | 0.01 | transmembrane protein 104 [Source:MGI Symbol;Acc:MGI:2444222]                          | transmembrane protein 104 [Source:MGI Symbol;Acc:MGI:2444222]                          | Q3TB48;A2A6S1;B2RU54                             |
| 334 | <b>Kif1b</b>   | 13.87 | 5.13 | 0.37 | 0.00 | kinesin family member 1B [Source:MGI Symbol;Acc:MGI:108426]                            | kinesin family member 1B [Source:MGI Symbol;Acc:MGI:108426]                            | Q60575;A2AH75;F6XNB6;Q3UY61;Q6PB45;Q8BN53;Q8C6Z0 |

|     |                      |        |       |      |      |                                                                                                |                                                                                                |                                                                                                                                                                           |
|-----|----------------------|--------|-------|------|------|------------------------------------------------------------------------------------------------|------------------------------------------------------------------------------------------------|---------------------------------------------------------------------------------------------------------------------------------------------------------------------------|
| 335 | <b>Xpnpep3</b>       | 2.78   | 1.03  | 0.37 | 0.03 | X-prolyl aminopeptidase 3, mitochondrial [Source:MGI Symbol;Acc:MGI:2445217]                   | X-prolyl aminopeptidase 3, mitochondrial [Source:MGI Symbol;Acc:MGI:2445217]                   | B7ZMP1;E9Q7I3                                                                                                                                                             |
| 336 | <b>Map1b</b>         | 0.84   | 0.31  | 0.37 | 0.00 | microtubule-associated protein 1B [Source:MGI Symbol;Acc:MGI:1306778]                          | microtubule-associated protein 1B [Source:MGI Symbol;Acc:MGI:1306778]                          | P14873;A0A286YDV1;A0PJ96;B2RQQ5;Q3TYV8;Q3TzM8;Q3UF78;Q3UPV4;Q8CAI9;Q8CFR9                                                                                                 |
| 337 | <b>Sbk1</b>          | 6.23   | 2.29  | 0.37 | 0.03 | SH3-binding kinase 1 [Source:MGI Symbol;Acc:MGI:2135937]                                       | SH3-binding kinase 1 [Source:MGI Symbol;Acc:MGI:2135937]                                       | Q8QZX0;A0A0U1RNW9;A0A0U1RNY5                                                                                                                                              |
| 338 | <b>9430078G10Rik</b> | 1.52   | 0.56  | 0.37 | 0.03 | RIKEN cDNA 9430078G10 MGI:3588259                                                              | RIKEN cDNA 9430078G10 MGI:3588259                                                              | Q3UVN2                                                                                                                                                                    |
| 339 | <b>Mfsd12</b>        | 4.06   | 1.49  | 0.37 | 0.00 | major facilitator superfamily domain containing 12 [Source:MGI Symbol;Acc:MGI:3604804]         | major facilitator superfamily domain containing 12 [Source:MGI Symbol;Acc:MGI:3604804]         | Q3U481;D6RJ45                                                                                                                                                             |
| 340 | <b>Adam19</b>        | 0.98   | 0.36  | 0.36 | 0.01 | a disintegrin and metallopeptidase domain 19 (meltrin beta) [Source:MGI Symbol;Acc:MGI:105377] | a disintegrin and metallopeptidase domain 19 (meltrin beta) [Source:MGI Symbol;Acc:MGI:105377] | O35674;Q14BL7;Q3UH67;Q3UHT3;Q80UF6                                                                                                                                        |
| 341 | <b>Ago2</b>          | 2.84   | 1.04  | 0.36 | 0.01 | argonaute RISC catalytic subunit 2 [Source:MGI Symbol;Acc:MGI:2446632]                         | argonaute RISC catalytic subunit 2 [Source:MGI Symbol;Acc:MGI:2446632]                         | Q8CJG0;Q3UQ34;Q6P239;Q6PHA2;Q8R3Q7                                                                                                                                        |
| 342 | <b>Zfp36l2</b>       | 22.71  | 8.25  | 0.36 | 0.01 | zinc finger protein 36, C3H type-like 2 [Source:MGI Symbol;Acc:MGI:107945]                     | zinc finger protein 36, C3H type-like 2 [Source:MGI Symbol;Acc:MGI:107945]                     | P23949;Q9EQL7;Q9EQL8                                                                                                                                                      |
| 343 | <b>Cdnf</b>          | 3.97   | 1.44  | 0.36 | 0.03 | cerebral dopamine neurotrophic factor [Source:MGI Symbol;Acc:MGI:3606576]                      | cerebral dopamine neurotrophic factor [Source:MGI Symbol;Acc:MGI:3606576]                      | Q8CC36                                                                                                                                                                    |
| 344 | <b>Tns1</b>          | 112.49 | 40.82 | 0.36 | 0.00 | tensin 1 [Source:MGI Symbol;Acc:MGI:104552]                                                    | tensin 1 [Source:MGI Symbol;Acc:MGI:104552]                                                    | A0A087WP40;A0A087WPC7;A0A087WQ94;A0A087WQM0;A0A087WQS0;A0A087WR29;A0A087WRU0;A0A087WRZ8;A0A087WS32;A0A087WSC8;A0A1D5RM59;E9Q0S6;Q3U0Q9;Q7TPM8;Q7TSV1;Q8C323;Q8C6V6;Q9DBT6 |
| 345 | <b>Igf2</b>          | 2.67   | 0.97  | 0.36 | 0.02 | insulin-like growth factor 2 [Source:MGI Symbol;Acc:MGI:96434]                                 | insulin-like growth factor 2 [Source:MGI Symbol;Acc:MGI:96434]                                 | P09535;B0LAD8;D3Z4N4;J3QJZ9;Q3UJB6                                                                                                                                        |
| 346 | <b>Eya2</b>          | 1.47   | 0.53  | 0.36 | 0.00 | EYA transcriptional coactivator and phosphatase 2 [Source:MGI Symbol;Acc:MGI:109341]           | EYA transcriptional coactivator and phosphatase 2 [Source:MGI Symbol;Acc:MGI:109341]           | O08575;Q3UR62;Q3UV00;Q811N7;Q811N8                                                                                                                                        |
| 347 | <b>Fosl2</b>         | 4.87   | 1.76  | 0.36 | 0.01 | fos-like antigen 2 [Source:MGI Symbol;Acc:MGI:102858]                                          | fos-like antigen 2 [Source:MGI Symbol;Acc:MGI:102858]                                          | P47930                                                                                                                                                                    |

|     |                      |       |      |      |      |                                                                                                |                                                                                                |                                                                    |
|-----|----------------------|-------|------|------|------|------------------------------------------------------------------------------------------------|------------------------------------------------------------------------------------------------|--------------------------------------------------------------------|
| 348 | <b>Gfod1</b>         | 2.64  | 0.96 | 0.36 | 0.01 | glucose-fructose oxidoreductase domain containing 1 [Source:MGI Symbol;Acc:MGI:2145304]        | glucose-fructose oxidoreductase domain containing 1 [Source:MGI Symbol;Acc:MGI:2145304]        | Q3UHD2;A0A1Y7VIZ4                                                  |
| 349 | <b>Epdr1</b>         | 1.68  | 0.61 | 0.36 | 0.00 | ependymin related protein 1 (zebrafish) [Source:MGI Symbol;Acc:MGI:2145369]                    | ependymin related protein 1 (zebrafish) [Source:MGI Symbol;Acc:MGI:2145369]                    | Q99M71;A0A1Y7VKS9                                                  |
| 350 | <b>Smad3</b>         | 2.51  | 0.90 | 0.36 | 0.00 | SMAD family member 3 [Source:MGI Symbol;Acc:MGI:1201674]                                       | SMAD family member 3 [Source:MGI Symbol;Acc:MGI:1201674]                                       | Q8BUN5;A2CG44;A2CG45;F7BUP2;Q05CN3;Q3V3E0                          |
| 351 | <b>Cpeb4</b>         | 2.90  | 1.04 | 0.36 | 0.01 | cytoplasmic polyadenylation element binding protein 4 [Source:MGI Symbol;Acc:MGI:1914829]      | cytoplasmic polyadenylation element binding protein 4 [Source:MGI Symbol;Acc:MGI:1914829]      | Q7TN98;Q3TSF0;Q3U4E1;Q5SU47;Q5SU48;Q9D5F3;Q9D5G2                   |
| 352 | <b>Atf7</b>          | 4.30  | 1.54 | 0.36 | 0.01 | activating transcription factor 7 [Source:MGI Symbol;Acc:MGI:2443472]                          | activating transcription factor 7 [Source:MGI Symbol;Acc:MGI:2443472]                          | O70191;A0A140LIB7;Q3TVK2;Q3UIF3                                    |
| 353 | <b>Ahdc1</b>         | 8.56  | 3.05 | 0.36 | 0.00 | AT hook, DNA binding motif, containing 1 [Source:MGI Symbol;Acc:MGI:2444218]                   | AT hook, DNA binding motif, containing 1 [Source:MGI Symbol;Acc:MGI:2444218]                   | Q6PAL7                                                             |
| 354 | <b>D830031N03Rik</b> | 2.61  | 0.93 | 0.36 | 0.00 | RIKEN cDNA D830031N03 MGI:3045367                                                              | RIKEN cDNA D830031N03 MGI:3045367                                                              | Q69ZZ9                                                             |
| 355 | <b>Ebf2</b>          | 4.59  | 1.63 | 0.36 | 0.02 | early B cell factor 2 [Source:MGI Symbol;Acc:MGI:894332]                                       | early B cell factor 2 [Source:MGI Symbol;Acc:MGI:894332]                                       | O08792                                                             |
| 356 | <b>Lnpep</b>         | 2.52  | 0.90 | 0.36 | 0.00 | leucyl/cystinyl aminopeptidase [Source:MGI Symbol;Acc:MGI:2387123]                             | leucyl/cystinyl aminopeptidase [Source:MGI Symbol;Acc:MGI:2387123]                             | Q8C129;Q3TA05;Q3TTA8;Q6NY09;Q8BZ14                                 |
| 357 | <b>Tom1l2</b>        | 10.45 | 3.70 | 0.35 | 0.00 | target of myb1-like 2 (chicken) [Source:MGI Symbol;Acc:MGI:2443306]                            | target of myb1-like 2 (chicken) [Source:MGI Symbol;Acc:MGI:2443306]                            | Q5SRX1;F6RBX1;F6ZDJ1;Q5SXA4;Q5SXA5                                 |
| 358 | <b>Cpeb3</b>         | 3.03  | 1.07 | 0.35 | 0.01 | Cytoplasmic polyadenylation element-binding protein 3 [Source:UniProtKB/Swiss-Prot;Acc:Q7TN99] | Cytoplasmic polyadenylation element-binding protein 3 [Source:UniProtKB/Swiss-Prot;Acc:Q7TN99] | Q7TN99;A0A0R4J102;D3YUL6;D3YXB8;D3Z1R6;D3Z3Z5;D3Z5F3;D3Z5R9;F6TOJ8 |
| 359 | <b>Nol4l</b>         | 4.00  | 1.41 | 0.35 | 0.03 | nucleolar protein 4-like [Source:MGI Symbol;Acc:MGI:1918765]                                   | nucleolar protein 4-like [Source:MGI Symbol;Acc:MGI:1918765]                                   | Q6DIB4;Q3TPB4;Q3TZG8;Q3UH85;Q52KQ8;Q6AXH3                          |

|     |                      |        |       |      |      |                                                                                                              |                                                                                                              |                                                                         |
|-----|----------------------|--------|-------|------|------|--------------------------------------------------------------------------------------------------------------|--------------------------------------------------------------------------------------------------------------|-------------------------------------------------------------------------|
| 360 | <b>Lrfn4</b>         | 3.77   | 1.33  | 0.35 | 0.01 | leucine rich repeat and fibronectin type III domain containing 4 [Source:MGI Symbol;Acc:MGI:2385612]         | leucine rich repeat and fibronectin type III domain containing 4 [Source:MGI Symbol;Acc:MGI:2385612]         | Q80XU8                                                                  |
| 361 | <b>Tenm4</b>         | 1.24   | 0.43  | 0.35 | 0.00 | teneurin transmembrane protein 4 [Source:MGI Symbol;Acc:MGI:2447063]                                         | teneurin transmembrane protein 4 [Source:MGI Symbol;Acc:MGI:2447063]                                         | Q3UHK6;A0A0U1RNZ7;A5HLW2;A5HLW3;D3YVP2;F6UP10;Q8CD62                    |
| 362 | <b>Ttyh3</b>         | 3.87   | 1.36  | 0.35 | 0.01 | tweety family member 3 [Source:MGI Symbol;Acc:MGI:1925589]                                                   | tweety family member 3 [Source:MGI Symbol;Acc:MGI:1925589]                                                   | Q6P5F7;A0A0G2JGJ4                                                       |
| 363 | <b>Klf13</b>         | 3.55   | 1.25  | 0.35 | 0.01 | Kruppel-like factor 13 [Source:MGI Symbol;Acc:MGI:1354948]                                                   | Kruppel-like factor 13 [Source:MGI Symbol;Acc:MGI:1354948]                                                   | Q9JJZ6;A0A087WQX4;Q3U2G6;Q9DCC0;V9GX95                                  |
| 364 | <b>Rere</b>          | 16.64  | 5.82  | 0.35 | 0.01 | arginine glutamic acid dipeptide (RE) repeats [Source:MGI Symbol;Acc:MGI:2683486]                            | arginine glutamic acid dipeptide (RE) repeats [Source:MGI Symbol;Acc:MGI:2683486]                            | Q80TZ9;A0A1W2P787;A2A7T1;A2A7T3;B1AS11;B7ZND6;Q2NLC0                    |
| 365 | <b>Cblb</b>          | 2.78   | 0.97  | 0.35 | 0.00 | Casitas B-lineage lymphoma b [Source:MGI Symbol;Acc:MGI:2146430]                                             | Casitas B-lineage lymphoma b [Source:MGI Symbol;Acc:MGI:2146430]                                             | Q9D273;D3Z1G7;Q3UQM9;Q3TTA7;B1NE43;B9EKI5                               |
| 366 | <b>Mknk2</b>         | 128.97 | 45.01 | 0.35 | 0.00 | MAP kinase-interacting serine/threonine kinase 2 [Source:MGI Symbol;Acc:MGI:894279]                          | MAP kinase-interacting serine/threonine kinase 2 [Source:MGI Symbol;Acc:MGI:894279]                          | Q8CDB0;A0A0G2JDJ0;A0A0G2JGQ2;A0A0G2JGS6;A0A0R4IZX7;A7E2R7;Q3TPM2;W6CR13 |
| 367 | <b>Uhmk1</b>         | 1.93   | 0.67  | 0.35 | 0.01 | U2AF homology motif (UHM) kinase 1 [Source:MGI Symbol;Acc:MGI:1341908]                                       | U2AF homology motif (UHM) kinase 1 [Source:MGI Symbol;Acc:MGI:1341908]                                       | P97343;D3YUF5;Q8C0N6                                                    |
| 368 | <b>2900026A02Rik</b> | 6.67   | 2.32  | 0.35 | 0.02 | RIKEN cDNA 2900026A02 gene [Source:MGI Symbol;Acc:MGI:1920194]                                               | RIKEN cDNA 2900026A02 gene [Source:MGI Symbol;Acc:MGI:1920194]                                               |                                                                         |
| 369 | <b>Abl2</b>          | 1.38   | 0.48  | 0.35 | 0.02 | v-abl Abelson murine leukemia viral oncogene 2 (arg, Abelson-related gene) [Source:MGI Symbol;Acc:MGI:87860] | v-abl Abelson murine leukemia viral oncogene 2 (arg, Abelson-related gene) [Source:MGI Symbol;Acc:MGI:87860] | Q4JIM5;A0A087WQB7;B2RQ57;B7ZMZ2;F8VQH0;G3UWQ2;Q61055;Q99P28             |
| 370 | <b>Dpysl2</b>        | 2.93   | 1.01  | 0.35 | 0.01 | dihydropyrimidinase-like 2 [Source:MGI Symbol;Acc:MGI:1349763]                                               | dihydropyrimidinase-like 2 [Source:MGI Symbol;Acc:MGI:1349763]                                               | O08553                                                                  |
| 371 | <b>Exoc6b</b>        | 1.86   | 0.64  | 0.34 | 0.00 | exocyst complex component 6B [Source:MGI Symbol;Acc:MGI:1923164]                                             | exocyst complex component 6B [Source:MGI Symbol;Acc:MGI:1923164]                                             | A6H5Z3;E0CY34;Q5DU10;Q6PCN5;Q8C1X1;Q8C203;Q8K2N8;Q9D4R7                 |

|     |                  |       |       |      |      |                                                                                                                              |                                                                                                                              |                                                                                                          |
|-----|------------------|-------|-------|------|------|------------------------------------------------------------------------------------------------------------------------------|------------------------------------------------------------------------------------------------------------------------------|----------------------------------------------------------------------------------------------------------|
| 372 | <b>Zkscan1</b>   | 1.37  | 0.47  | 0.34 | 0.01 | zinc finger with KRAB and SCAN domains 1 [Source:MGI Symbol;Acc:MGI:1921820]                                                 | zinc finger with KRAB and SCAN domains 1 [Source:MGI Symbol;Acc:MGI:1921820]                                                 | D3Z3H8;Q5DTG4;Q8C689;Q9R162;Q8BGS3;Q8BUH6;Q8BZY7                                                         |
| 373 | <b>Ywhag</b>     | 69.58 | 23.73 | 0.34 | 0.01 | tyrosine 3-monooxygenase/tryptophan 5-monooxygenase activation protein, gamma polypeptide [Source:MGI Symbol;Acc:MGI:108109] | tyrosine 3-monooxygenase/tryptophan 5-monooxygenase activation protein, gamma polypeptide [Source:MGI Symbol;Acc:MGI:108109] | P61982;A8IP69;Q3TP56                                                                                     |
| 374 | <b>Spata13</b>   | 2.18  | 0.74  | 0.34 | 0.00 | spermatogenesis associated 13 [Source:MGI Symbol;Acc:MGI:104838]                                                             | spermatogenesis associated 13 [Source:MGI Symbol;Acc:MGI:104838]                                                             | Q5DU57;B7ZNJ6;B9EHV2;E0CXN6;E0CYU0;E0CZ51;E9Q3I3;F6SRZ4;F6V9S1                                           |
| 375 | <b>Rc3h2</b>     | 1.31  | 0.44  | 0.34 | 0.00 | ring finger and CCCH-type zinc finger domains 2 [Source:MGI Symbol;Acc:MGI:2442789]                                          | ring finger and CCCH-type zinc finger domains 2 [Source:MGI Symbol;Acc:MGI:2442789]                                          | P0C090;A0A0N4SVF7;A2AVP4;Q148V4;Q148V5                                                                   |
| 376 | <b>Jun</b>       | 28.37 | 9.56  | 0.34 | 0.00 | jun proto-oncogene [Source:MGI Symbol;Acc:MGI:96646]                                                                         | jun proto-oncogene [Source:MGI Symbol;Acc:MGI:96646]                                                                         | P05627;Q3US19;Q3V255;Q52L79;Q6TDG5                                                                       |
| 377 | <b>Ppp1r9b</b>   | 72.29 | 24.34 | 0.34 | 0.01 | protein phosphatase 1, regulatory subunit 9B [Source:MGI Symbol;Acc:MGI:2387581]                                             | protein phosphatase 1, regulatory subunit 9B [Source:MGI Symbol;Acc:MGI:2387581]                                             | Q6R891;Q8C3W4                                                                                            |
| 378 | <b>Rab11fip4</b> | 1.36  | 0.46  | 0.34 | 0.03 | RAB11 family interacting protein 4 (class II) [Source:MGI Symbol;Acc:MGI:2442920]                                            | RAB11 family interacting protein 4 (class II) [Source:MGI Symbol;Acc:MGI:2442920]                                            | Q8BQP8;F6YI06;Q3U4R6                                                                                     |
| 379 | <b>Inhbb</b>     | 1.57  | 0.52  | 0.33 | 0.01 | inhibin beta-B [Source:MGI Symbol;Acc:MGI:96571]                                                                             | inhibin beta-B [Source:MGI Symbol;Acc:MGI:96571]                                                                             | Q04999                                                                                                   |
| 380 | <b>Nuak1</b>     | 2.26  | 0.75  | 0.33 | 0.00 | NUAK family, SNF1-like kinase, 1 [Source:MGI Symbol;Acc:MGI:1925226]                                                         | NUAK family, SNF1-like kinase, 1 [Source:MGI Symbol;Acc:MGI:1925226]                                                         | Q641K5;F6XZX4                                                                                            |
| 381 | <b>Afap1</b>     | 2.69  | 0.89  | 0.33 | 0.01 | actin filament associated protein 1 [Source:MGI Symbol;Acc:MGI:1917542]                                                      | actin filament associated protein 1 [Source:MGI Symbol;Acc:MGI:1917542]                                                      | Q80YS6;A0A1D5RLL0;E9Q8X9;Q8BV31;Q9CT56                                                                   |
| 382 | <b>Foxn3</b>     | 3.75  | 1.24  | 0.33 | 0.00 | forkhead box N3 [Source:MGI Symbol;Acc:MGI:1918625]                                                                          | forkhead box N3 [Source:MGI Symbol;Acc:MGI:1918625]                                                                          | Q499D0;A0A1Y7VMU1;H3BLD8;H3BLJ5;Q3UF56                                                                   |
| 383 | <b>Sipa1l3</b>   | 3.00  | 0.99  | 0.33 | 0.01 | signal-induced proliferation-associated 1 like 3 [Source:MGI Symbol;Acc:MGI:1921456]                                         | signal-induced proliferation-associated 1 like 3 [Source:MGI Symbol;Acc:MGI:1921456]                                         | G3X9J0;A0AUN2;A2VCS4;A6H637;A7MCX1;Q4VBF3;Q6A050;Q8BGC2;Q8K054;Q9CSR2;S4R1P8;S4R1S0;S4R1U8;S4R2C7;S4R2N4 |

|     |               |       |      |      |      |                                                                                                    |                                                                                                    |                                                         |
|-----|---------------|-------|------|------|------|----------------------------------------------------------------------------------------------------|----------------------------------------------------------------------------------------------------|---------------------------------------------------------|
| 384 | <b>Zbtb7a</b> | 11.30 | 3.70 | 0.33 | 0.01 | zinc finger and BTB domain containing 7a [Source:MGI Symbol;Acc:MGI:1335091]                       | zinc finger and BTB domain containing 7a [Source:MGI Symbol;Acc:MGI:1335091]                       | O88939;B7ZWA9;D3YVF8;D3YZI8;D3Z4C3                      |
| 385 | <b>Glccl1</b> | 1.64  | 0.54 | 0.33 | 0.00 | glucocorticoid induced transcript 1 [Source:MGI Symbol;Acc:MGI:2179717]                            | glucocorticoid induced transcript 1 [Source:MGI Symbol;Acc:MGI:2179717]                            | Q8K3I9;A0A0R4J1Y9;A0A0R4J1Z9;E0CXI8;E9QKK4              |
| 386 | <b>Trim67</b> | 4.31  | 1.40 | 0.33 | 0.00 | tripartite motif-containing 67 [Source:MGI Symbol;Acc:MGI:3045323]                                 | tripartite motif-containing 67 [Source:MGI Symbol;Acc:MGI:3045323]                                 | Q505D9;Q571A7;Q8BQ60                                    |
| 387 | <b>Lrrc25</b> | 2.13  | 0.69 | 0.33 | 0.00 | leucine rich repeat containing 25 [Source:MGI Symbol;Acc:MGI:2445284]                              | leucine rich repeat containing 25 [Source:MGI Symbol;Acc:MGI:2445284]                              | Q8K1T1;A0A1B0GRA2;B9EHD0                                |
| 388 | <b>Mamld1</b> | 1.38  | 0.45 | 0.32 | 0.02 | mastermind-like domain containing 1 [Source:MGI Symbol;Acc:MGI:3045303]                            | mastermind-like domain containing 1 [Source:MGI Symbol;Acc:MGI:3045303]                            | P0C6A2;B2RXP0;B2RXV1;B7ZWF2;D3Z768                      |
| 389 | <b>Mllt6</b>  | 24.09 | 7.81 | 0.32 | 0.00 | myeloid/lymphoid or mixed-lineage leukemia; translocated to, 6 [Source:MGI Symbol;Acc:MGI:1935145] | myeloid/lymphoid or mixed-lineage leukemia; translocated to, 6 [Source:MGI Symbol;Acc:MGI:1935145] | B1AR09;B1AR10;Q3UPK1;Q8CFR8;Q8VHB4                      |
| 390 | <b>Bcl2l2</b> | 10.49 | 3.40 | 0.32 | 0.01 | BCL2-like 2 [Source:MGI Symbol;Acc:MGI:108052]                                                     | BCL2-like 2 [Source:MGI Symbol;Acc:MGI:108052]                                                     | P70345;A0A2I3BR11;G3XA70;Q9D1Y5                         |
| 391 | <b>Egr1</b>   | 5.41  | 1.75 | 0.32 | 0.00 | early growth response 1 [Source:MGI Symbol;Acc:MGI:95295]                                          | early growth response 1 [Source:MGI Symbol;Acc:MGI:95295]                                          | P08046;Q3UM09;Q3UZU7;Q544D6;Q6LDK7;Q8CAT6               |
| 392 | <b>Klf7</b>   | 3.83  | 1.23 | 0.32 | 0.02 | Kruppel-like factor 7 (ubiquitous) [Source:MGI Symbol;Acc:MGI:1935151]                             | Kruppel-like factor 7 (ubiquitous) [Source:MGI Symbol;Acc:MGI:1935151]                             | Q99JB0;A2AAB6;Q3UES6;Q8BUB8;Q8BZ72                      |
| 393 | <b>Sp1</b>    | 2.96  | 0.95 | 0.32 | 0.01 | trans-acting transcription factor 1 [Source:MGI Symbol;Acc:MGI:98372]                              | trans-acting transcription factor 1 [Source:MGI Symbol;Acc:MGI:98372]                              | O89090;A2TH11;E9Q0S7;E9Q113;E9Q2V3;G3X8Q0;Q76LW6;Q3UPN3 |
| 394 | <b>Slc4a4</b> | 10.03 | 3.22 | 0.32 | 0.02 | solute carrier family 4 (anion exchanger), member 4 [Source:MGI Symbol;Acc:MGI:1927555]            | solute carrier family 4 (anion exchanger), member 4 [Source:MGI Symbol;Acc:MGI:1927555]            | O88343;A2VDF7;A7E1Z5;D3Z7G8;D3Z7I7;E1AWU4;E3VWA1;E9Q8N8 |
| 395 | <b>Btbd9</b>  | 1.52  | 0.48 | 0.32 | 0.00 | BTB (POZ) domain containing 9 [Source:MGI Symbol;Acc:MGI:1916625]                                  | BTB (POZ) domain containing 9 [Source:MGI Symbol;Acc:MGI:1916625]                                  | Q8C726;Q3TUC6;Q3U4Z0;Q69Z81;Q6P541;Q8C2V5;Q8CDU2;Q9DA12 |

|     |                 |       |       |      |      |                                                                                                                                    |                                                                                                                                    |                                                                         |
|-----|-----------------|-------|-------|------|------|------------------------------------------------------------------------------------------------------------------------------------|------------------------------------------------------------------------------------------------------------------------------------|-------------------------------------------------------------------------|
| 396 | <b>Dagla</b>    | 9.58  | 3.06  | 0.32 | 0.01 | diacylglycerol lipase, alpha<br>[Source:MGI<br>Symbol;Acc:MGI:2677061]                                                             | diacylglycerol lipase, alpha<br>[Source:MGI<br>Symbol;Acc:MGI:2677061]                                                             | Q6WQJ1;A4FU75;S4R2M3                                                    |
| 397 | <b>Kdm6b</b>    | 19.09 | 6.04  | 0.32 | 0.00 | KDM1 lysine (K)-specific<br>demethylase 6B [Source:MGI<br>Symbol;Acc:MGI:2448492]                                                  | KDM1 lysine (K)-specific<br>demethylase 6B [Source:MGI<br>Symbol;Acc:MGI:2448492]                                                  | Q5NCY0;Q3UQG0;Q8K0Z1                                                    |
| 398 | <b>Rc3h1</b>    | 3.32  | 1.05  | 0.32 | 0.00 | RING CCCH (C3H) domains 1<br>[Source:MGI<br>Symbol;Acc:MGI:2685397]                                                                | RING CCCH (C3H) domains 1<br>[Source:MGI<br>Symbol;Acc:MGI:2685397]                                                                | Q4VGL6;H7BX02;Q3TS82;Q3UT88                                             |
| 399 | <b>Zcchc24</b>  | 4.45  | 1.40  | 0.31 | 0.01 | zinc finger, CCHC domain<br>containing 24 [Source:MGI<br>Symbol;Acc:MGI:1919168]                                                   | zinc finger, CCHC domain<br>containing 24 [Source:MGI<br>Symbol;Acc:MGI:1919168]                                                   | B2RVL6                                                                  |
| 400 | <b>Adamtsl3</b> | 1.24  | 0.39  | 0.31 | 0.00 | ADAMTS-like 3 [Source:MGI<br>Symbol;Acc:MGI:3028499]                                                                               | ADAMTS-like 3 [Source:MGI<br>Symbol;Acc:MGI:3028499]                                                                               | G3UWL5;G3UXC7;G3UYN1;Q5DTZ4                                             |
| 401 | <b>Nr3c2</b>    | 1.59  | 0.50  | 0.31 | 0.01 | nuclear receptor subfamily 3,<br>group C, member 2<br>[Source:MGI<br>Symbol;Acc:MGI:99459]                                         | nuclear receptor subfamily 3,<br>group C, member 2 [Source:MGI<br>Symbol;Acc:MGI:99459]                                            | Q8VII8;A3KN90;D3Z473;D3Z7F2;D3Z7J4;D6RIL1;E9Q8M8;Q3UW<br>58             |
| 402 | <b>Slc25a48</b> | 6.71  | 2.09  | 0.31 | 0.01 | solute carrier family 25,<br>member 48 [Source:MGI<br>Symbol;Acc:MGI:2145373]                                                      | solute carrier family 25,<br>member 48 [Source:MGI<br>Symbol;Acc:MGI:2145373]                                                      | Q8BW66                                                                  |
| 403 | <b>Kcnk3</b>    | 39.16 | 12.13 | 0.31 | 0.03 | potassium channel, subfamily<br>K, member 3 [Source:MGI<br>Symbol;Acc:MGI:1100509]                                                 | potassium channel, subfamily K,<br>member 3 [Source:MGI<br>Symbol;Acc:MGI:1100509]                                                 | O35111;Q9QX34                                                           |
| 404 | <b>Trib1</b>    | 9.04  | 2.80  | 0.31 | 0.00 | tribbles pseudokinase 1<br>[Source:MGI<br>Symbol;Acc:MGI:2443397]                                                                  | tribbles pseudokinase 1<br>[Source:MGI<br>Symbol;Acc:MGI:2443397]                                                                  | Q8K4K4                                                                  |
| 405 | <b>Tnfrsf14</b> | 3.15  | 0.97  | 0.31 | 0.01 | tumor necrosis factor receptor<br>superfamily, member 14<br>(herpesvirus entry mediator)<br>[Source:MGI<br>Symbol;Acc:MGI:2675303] | tumor necrosis factor receptor<br>superfamily, member 14<br>(herpesvirus entry mediator)<br>[Source:MGI<br>Symbol;Acc:MGI:2675303] | A0A1W2P6M8;A0A1W2P7D5;A0A1W2P889;F6Y2U8;Q3SXX1;Q7<br>1F55;Q80WM9;Q8VC17 |
| 406 | <b>Zfp395</b>   | 13.87 | 4.27  | 0.31 | 0.00 | zinc finger protein 395<br>[Source:MGI<br>Symbol;Acc:MGI:2682318]                                                                  | zinc finger protein 395<br>[Source:MGI<br>Symbol;Acc:MGI:2682318]                                                                  | A0A286YDB9;A0A286YDG8;E9Q5N9;Q3U227;Q7TPT8                              |
| 407 | <b>Kmt2d</b>    | 18.37 | 5.66  | 0.31 | 0.00 | lysine (K)-specific<br>methyltransferase 2D<br>[Source:MGI<br>Symbol;Acc:MGI:2682319]                                              | lysine (K)-specific<br>methyltransferase 2D<br>[Source:MGI<br>Symbol;Acc:MGI:2682319]                                              | Q6PDK2;A0A0A0MQ73;A0A0A6YY77;A0A2R8VHD4;Q3USG3;Q3<br>USM7;V9GX77        |

|     |                 |       |      |      |      |                                                                                                       |                                                                                                       |                                                                                           |
|-----|-----------------|-------|------|------|------|-------------------------------------------------------------------------------------------------------|-------------------------------------------------------------------------------------------------------|-------------------------------------------------------------------------------------------|
| 408 | <b>Tmem127</b>  | 4.66  | 1.43 | 0.31 | 0.01 | transmembrane protein 127 [Source:MGI Symbol;Acc:MGI:1916720]                                         | transmembrane protein 127 [Source:MGI Symbol;Acc:MGI:1916720]                                         | Q8BGP5;G3UXI2;G3UZT7                                                                      |
| 409 | <b>Arrb1</b>    | 3.34  | 1.02 | 0.31 | 0.00 | arrestin, beta 1 [Source:MGI Symbol;Acc:MGI:99473]                                                    | arrestin, beta 1 [Source:MGI Symbol;Acc:MGI:99473]                                                    | Q8BWG8;E0CY53;E0CYB1;F7DF62;J3QNU6;Q3U172                                                 |
| 410 | <b>Ctcf1</b>    | 9.10  | 2.78 | 0.31 | 0.00 | CCCTC-binding factor (zinc finger protein)-like [Source:MGI Symbol;Acc:MGI:3652571]                   | CCCTC-binding factor (zinc finger protein)-like [Source:MGI Symbol;Acc:MGI:3652571]                   | Q61164;Q05CK6;Q3USR8;Q3UYZ8;Q3UZH8;A2APF3;B4XVN2                                          |
| 411 | <b>Rassf8</b>   | 2.31  | 0.71 | 0.31 | 0.00 | Ras association (RalGDS/AF-6) domain family (N-terminal) member 8 [Source:MGI Symbol;Acc:MGI:1918573] | Ras association (RalGDS/AF-6) domain family (N-terminal) member 8 [Source:MGI Symbol;Acc:MGI:1918573] | Q8CJ96;E9QA00;F7BB71;Q99KG2                                                               |
| 412 | <b>Eif4ebp2</b> | 18.41 | 5.62 | 0.31 | 0.04 | eukaryotic translation initiation factor 4E binding protein 2 [Source:MGI Symbol;Acc:MGI:109198]      | eukaryotic translation initiation factor 4E binding protein 2 [Source:MGI Symbol;Acc:MGI:109198]      | P70445;Q3UFP6;Q3UZD4                                                                      |
| 413 | <b>Pdzd2</b>    | 11.74 | 3.58 | 0.30 | 0.00 | PDZ domain containing 2 [Source:MGI Symbol;Acc:MGI:1922394]                                           | PDZ domain containing 2 [Source:MGI Symbol;Acc:MGI:1922394]                                           | A0A087WQ09;A0A087WRL4;A0A087WS85;E9Q1M1;Q14BH0;Q3 TRS4;Q3TXZ4;Q3UW81;Q80U45;Q9CTP6;Q9D4Z1 |
| 414 | <b>Tbc1d16</b>  | 1.27  | 0.39 | 0.30 | 0.05 | TBC1 domain family, member 16 [Source:MGI Symbol;Acc:MGI:2652878]                                     | TBC1 domain family, member 16 [Source:MGI Symbol;Acc:MGI:2652878]                                     | A2ABG4;A2AFK9;Q6PFC0;Q8BXD8                                                               |
| 415 | <b>Prcc2b</b>   | 8.02  | 2.44 | 0.30 | 0.00 | proline-rich coiled-coil 2B [Source:MGI Symbol;Acc:MGI:1923304]                                       | proline-rich coiled-coil 2B [Source:MGI Symbol;Acc:MGI:1923304]                                       | Q7TPM1;F6Q3E1;F6V431;F7AYW2;F8WHT3;Q80TY7                                                 |
| 416 | <b>Ndst1</b>    | 6.90  | 2.09 | 0.30 | 0.01 | N-deacetylase/N-sulfotransferase (heparan glucosaminyl) 1 [Source:MGI Symbol;Acc:MGI:104719]          | N-deacetylase/N-sulfotransferase (heparan glucosaminyl) 1 [Source:MGI Symbol;Acc:MGI:104719]          | Q3UHN9                                                                                    |
| 417 | <b>Igf1r</b>    | 1.46  | 0.44 | 0.30 | 0.04 | insulin-like growth factor I receptor [Source:MGI Symbol;Acc:MGI:96433]                               | insulin-like growth factor I receptor [Source:MGI Symbol;Acc:MGI:96433]                               | Q60751;E9QNX9;Q3U1L4;Q3UVJ3                                                               |
| 418 | <b>Rora</b>     | 1.24  | 0.37 | 0.30 | 0.02 | RAR-related orphan receptor alpha [Source:MGI Symbol;Acc:MGI:104661]                                  | RAR-related orphan receptor alpha [Source:MGI Symbol;Acc:MGI:104661]                                  | P51448;G3UZ02;Q3U1P4;Q8BRL5;Q8C3F5                                                        |
| 419 | <b>Zmiz1</b>    | 7.00  | 2.10 | 0.30 | 0.00 | zinc finger, MIZ-type containing 1 [Source:MGI Symbol;Acc:MGI:3040693]                                | zinc finger, MIZ-type containing 1 [Source:MGI Symbol;Acc:MGI:3040693]                                | Q6P1E1;Q3TEV4;Q3V215                                                                      |

|     |                 |       |       |      |      |                                                                                        |                                                                                        |                                                                                                 |
|-----|-----------------|-------|-------|------|------|----------------------------------------------------------------------------------------|----------------------------------------------------------------------------------------|-------------------------------------------------------------------------------------------------|
| 420 | <b>Nat8l</b>    | 37.63 | 11.24 | 0.30 | 0.01 | N-acetyltransferase 8-like<br>[Source:MGI<br>Symbol;Acc:MGI:2447776]                   | N-acetyltransferase 8-like<br>[Source:MGI<br>Symbol;Acc:MGI:2447776]                   | Q3UGX3;A0A0R4J0R4                                                                               |
| 421 | <b>Cpn2</b>     | 4.66  | 1.39  | 0.30 | 0.03 | carboxypeptidase N,<br>polypeptide 2 [Source:MGI<br>Symbol;Acc:MGI:1919006]            | carboxypeptidase N,<br>polypeptide 2 [Source:MGI<br>Symbol;Acc:MGI:1919006]            | Q3TG86;Q3TR45;Q3UQH5;P15539;G3UWE4;Q9DBB9;Q642I5;P5<br>9108;A0A0R4J1D0;A0A1D5RLP0;Q3TVB2;Q8QZU9 |
| 422 | <b>Tgfbr3</b>   | 5.52  | 1.64  | 0.30 | 0.00 | transforming growth factor,<br>beta receptor III [Source:MGI<br>Symbol;Acc:MGI:104637] | transforming growth factor,<br>beta receptor III [Source:MGI<br>Symbol;Acc:MGI:104637] | O88393;A0A0R4J097;F6VPT9;Q3TM82                                                                 |
| 423 | <b>Foxk1</b>    | 3.81  | 1.13  | 0.30 | 0.00 | forkhead box K1 [Source:MGI<br>Symbol;Acc:MGI:1347488]                                 | forkhead box K1 [Source:MGI<br>Symbol;Acc:MGI:1347488]                                 | P42128;A0A0G2JG71;Q99LQ5                                                                        |
| 424 | <b>Setd1b</b>   | 4.83  | 1.43  | 0.30 | 0.00 | SET domain containing 1B<br>[Source:MGI<br>Symbol;Acc:MGI:2652820]                     | SET domain containing 1B<br>[Source:MGI<br>Symbol;Acc:MGI:2652820]                     | Q8CFT2;G3UZ56;Q3URP1                                                                            |
| 425 | <b>Elk4</b>     | 5.53  | 1.63  | 0.30 | 0.00 | ELK4, member of ETS<br>oncogene family [Source:MGI<br>Symbol;Acc:MGI:102853]           | ELK4, member of ETS oncogene<br>family [Source:MGI<br>Symbol;Acc:MGI:102853]           | P41158;A0A1B0GXH8;C7C6A9;C7C6B0;C7C6B1;F6ZCI1;Q8C6Q0;<br>Q8C9K0;Q99K98                          |
| 426 | <b>Rad54l2</b>  | 2.27  | 0.67  | 0.29 | 0.00 | RAD54 like 2 (S. cerevisiae)<br>[Source:MGI<br>Symbol;Acc:MGI:1933196]                 | RAD54 like 2 (S. cerevisiae)<br>[Source:MGI<br>Symbol;Acc:MGI:1933196]                 | Q99NG0;A0A087WP96;A0A087WPJ6;E9QKL0;O35695;Q3UQR8                                               |
| 427 | <b>Tusc5</b>    | 57.17 | 16.66 | 0.29 | 0.00 | tumor suppressor candidate 5<br>[Source:MGI<br>Symbol;Acc:MGI:3029307]                 | tumor suppressor candidate 5<br>[Source:MGI<br>Symbol;Acc:MGI:3029307]                 | Q8C838                                                                                          |
| 428 | <b>Synpo</b>    | 6.54  | 1.90  | 0.29 | 0.00 | synaptopodin [Source:MGI<br>Symbol;Acc:MGI:1099446]                                    | synaptopodin [Source:MGI<br>Symbol;Acc:MGI:1099446]                                    | Q8CC35;E0CYK1;E9Q3E2;Q3TA13;Q3TBE2;Q3TY32;Q3U336;Q3U<br>RF1;Q497V1                              |
| 429 | <b>Cd300ld4</b> | 1.58  | 0.46  | 0.29 | 0.04 | CD300 molecule like family<br>member D4 MGI:3702658                                    | CD300 molecule like family<br>member D4 MGI:3702658                                    | A2A7W1                                                                                          |
| 430 | <b>Purb</b>     | 4.49  | 1.29  | 0.29 | 0.00 | purine rich element binding<br>protein B [Source:MGI<br>Symbol;Acc:MGI:1338779]        | purine rich element binding<br>protein B [Source:MGI<br>Symbol;Acc:MGI:1338779]        | O35295;Q3UTJ8;Q8BQK8;Q9D7C3                                                                     |
| 431 | <b>Stox2</b>    | 1.42  | 0.40  | 0.28 | 0.01 | storkhead box 2 [Source:MGI<br>Symbol;Acc:MGI:1918319]                                 | storkhead box 2 [Source:MGI<br>Symbol;Acc:MGI:1918319]                                 | Q499E5;A0A1B0GRU7;A0A1B0GT73;A0A1D5RMH0                                                         |
| 432 | <b>Lrrc58</b>   | 6.02  | 1.70  | 0.28 | 0.00 | leucine rich repeat containing<br>58 [Source:MGI<br>Symbol;Acc:MGI:2443542]            | leucine rich repeat containing<br>58 [Source:MGI<br>Symbol;Acc:MGI:2443542]            | Q3UGP9;Q8BTI3                                                                                   |

|     |                |       |      |      |      |                                                                                                           |                                                                                                           |                                                                              |
|-----|----------------|-------|------|------|------|-----------------------------------------------------------------------------------------------------------|-----------------------------------------------------------------------------------------------------------|------------------------------------------------------------------------------|
| 433 | <b>Gatad2b</b> | 4.22  | 1.19 | 0.28 | 0.01 | GATA zinc finger domain containing 2B [Source:MGI Symbol;Acc:MGI:2443225]                                 | GATA zinc finger domain containing 2B [Source:MGI Symbol;Acc:MGI:2443225]                                 | Q8VHR5;A0A0U1RNM2;A1L3S7;Q69ZQ5;Q6PAH8                                       |
| 434 | <b>Slc16a2</b> | 2.09  | 0.58 | 0.28 | 0.00 | solute carrier family 16 (monocarboxylic acid transporters), member 2 [Source:MGI Symbol;Acc:MGI:1203732] | solute carrier family 16 (monocarboxylic acid transporters), member 2 [Source:MGI Symbol;Acc:MGI:1203732] | O70324;Q05BA2                                                                |
| 435 | <b>Cgnl1</b>   | 32.86 | 9.04 | 0.27 | 0.00 | cingulin-like 1 [Source:MGI Symbol;Acc:MGI:1915428]                                                       | cingulin-like 1 [Source:MGI Symbol;Acc:MGI:1915428]                                                       | Q6AW69;B2RSU6;B2RY19;D3Z3H4                                                  |
| 436 | <b>Lmtk2</b>   | 4.13  | 1.13 | 0.27 | 0.00 | lemur tyrosine kinase 2 [Source:MGI Symbol;Acc:MGI:3036247]                                               | lemur tyrosine kinase 2 [Source:MGI Symbol;Acc:MGI:3036247]                                               | Q3TYD6                                                                       |
| 437 | <b>Nfia</b>    | 9.18  | 2.47 | 0.27 | 0.01 | nuclear factor I/A [Source:MGI Symbol;Acc:MGI:108056]                                                     | nuclear factor I/A [Source:MGI Symbol;Acc:MGI:108056]                                                     | Q02780;B1AUB6;B1AUB8;B1AUB9;B1AUC0;F7CDR2;Q05B39;Q3UTK6;Q69ZJ5;Q6DI81;Q8C6U6 |
| 438 | <b>Rnf150</b>  | 2.43  | 0.65 | 0.27 | 0.01 | ring finger protein 150 [Source:MGI Symbol;Acc:MGI:2443860]                                               | ring finger protein 150 [Source:MGI Symbol;Acc:MGI:2443860]                                               | Q5DTZ6;Q3TDH4                                                                |
| 439 | <b>Kctd12</b>  | 4.90  | 1.30 | 0.27 | 0.02 | potassium channel tetramerisation domain containing 12 [Source:MGI Symbol;Acc:MGI:2145823]                | potassium channel tetramerisation domain containing 12 [Source:MGI Symbol;Acc:MGI:2145823]                | Q6WVG3;A0A0R4J2B2;Q14AX3;Q69ZA6;Q8C2V2;Q8CBQ4;Q8C7J6                         |
| 440 | <b>Megf9</b>   | 1.90  | 0.50 | 0.26 | 0.00 | multiple EGF-like-domains 9 [Source:MGI Symbol;Acc:MGI:1918264]                                           | multiple EGF-like-domains 9 [Source:MGI Symbol;Acc:MGI:1918264]                                           | Q8BH27;F8WHT8;Q0VGR4                                                         |
| 441 | <b>Tet3</b>    | 4.13  | 1.09 | 0.26 | 0.00 | tet methylcytosine dioxygenase 3 [Source:MGI Symbol;Acc:MGI:2446229]                                      | tet methylcytosine dioxygenase 3 [Source:MGI Symbol;Acc:MGI:2446229]                                      | Q8BG87;A0A087WP90;K9JH93;Q80U11;Q8BNB2                                       |
| 442 | <b>Scd2</b>    | 4.05  | 1.06 | 0.26 | 0.01 | stearoyl-Coenzyme A desaturase 2 [Source:MGI Symbol;Acc:MGI:98240]                                        | stearoyl-Coenzyme A desaturase 2 [Source:MGI Symbol;Acc:MGI:98240]                                        | P13011                                                                       |
| 443 | <b>Irs1</b>    | 1.69  | 0.44 | 0.26 | 0.01 | insulin receptor substrate 1 [Source:MGI Symbol;Acc:MGI:99454]                                            | insulin receptor substrate 1 [Source:MGI Symbol;Acc:MGI:99454]                                            | P35569;Q543V3                                                                |
| 444 | <b>Krt80</b>   | 1.27  | 0.33 | 0.26 | 0.01 | keratin 80 [Source:MGI Symbol;Acc:MGI:1921377]                                                            | keratin 80 [Source:MGI Symbol;Acc:MGI:1921377]                                                            | Q0VBK2;A0A2R8VHR6;Q3TBQ1;Q8C1M7                                              |

|     |                  |        |        |      |      |                                                                                                   |                                                                                                   |                                                                              |
|-----|------------------|--------|--------|------|------|---------------------------------------------------------------------------------------------------|---------------------------------------------------------------------------------------------------|------------------------------------------------------------------------------|
| 445 | <b>Amotl1</b>    | 9.48   | 2.42   | 0.26 | 0.00 | angiotensin-like 1 [Source:MGI Symbol;Acc:MGI:1922973]                                            | angiotensin-like 1 [Source:MGI Symbol;Acc:MGI:1922973]                                            | Q9D4H4;A0A1Y7VL02;A0A1Y7VM69                                                 |
| 446 | <b>Ctif</b>      | 5.67   | 1.43   | 0.25 | 0.00 | Cap Binding Complex Dependent Translation Initiation Factor MGI:2685518                           | Cap Binding Complex Dependent Translation Initiation Factor MGI:2685518                           | Q6PEE2;E9Q1U6                                                                |
| 447 | <b>Il6ra</b>     | 2.53   | 0.64   | 0.25 | 0.00 | interleukin 6 receptor, alpha [Source:MGI Symbol;Acc:MGI:105304]                                  | interleukin 6 receptor, alpha [Source:MGI Symbol;Acc:MGI:105304]                                  | P22272;A0A0G2JGF1;Q3URV7;V9H161                                              |
| 448 | <b>Zfp609</b>    | 4.85   | 1.22   | 0.25 | 0.01 | zinc finger protein 609 [Source:MGI Symbol;Acc:MGI:2674092]                                       | zinc finger protein 609 [Source:MGI Symbol;Acc:MGI:2674092]                                       | Q8BZ47;B2RWS7;E0CYU4                                                         |
| 449 | <b>Nfib</b>      | 6.83   | 1.69   | 0.25 | 0.00 | nuclear factor I/B [Source:MGI Symbol;Acc:MGI:103188]                                             | nuclear factor I/B [Source:MGI Symbol;Acc:MGI:103188]                                             | P97863;A2ADI3;A2BG75;A2BG76;A2BG77;I7HIP8;Q3UFE1;Q6GSP7;Q8C434;Q8C6T9;Q8C7G6 |
| 450 | <b>Nrp2</b>      | 14.63  | 3.62   | 0.25 | 0.01 | neuropilin 2 [Source:MGI Symbol;Acc:MGI:1100492]                                                  | neuropilin 2 [Source:MGI Symbol;Acc:MGI:1100492]                                                  | O35375;Q3U5I8;Q3URT2;Q8BPZ0;Q8K2T3;Q8QZY7;Q61220;A0A2R8VHV8;Q8BM06;Q8BM43    |
| 451 | <b>Ryr2</b>      | 1.47   | 0.36   | 0.25 | 0.00 | ryanodine receptor 2, cardiac [Source:MGI Symbol;Acc:MGI:99685]                                   | ryanodine receptor 2, cardiac [Source:MGI Symbol;Acc:MGI:99685]                                   | E9Q401;A0A1Y7VJP1;A0A1Y7VK09;F6U7V1;Q60835;Q80ZZ5;Q9C TT8                    |
| 452 | <b>Trp53inp2</b> | 33.26  | 8.18   | 0.25 | 0.00 | transformation related protein 53 inducible nuclear protein 2 [Source:MGI Symbol;Acc:MGI:1915978] | transformation related protein 53 inducible nuclear protein 2 [Source:MGI Symbol;Acc:MGI:1915978] | Q8CFU8;A2ARD0;A2ARD1;G3UXZ2;Q3TXH1;Q3UEJ3                                    |
| 453 | <b>Nfic</b>      | 12.61  | 3.10   | 0.25 | 0.00 | nuclear factor I/C [Source:MGI Symbol;Acc:MGI:109591]                                             | nuclear factor I/C [Source:MGI Symbol;Acc:MGI:109591]                                             | P70255;A0A1Y7VK55;F6XYU7;Q3UHA6;Q9D188                                       |
| 454 | <b>Scd1</b>      | 947.99 | 231.07 | 0.24 | 0.00 | stearoyl-Coenzyme A desaturase 1 [Source:MGI Symbol;Acc:MGI:98239]                                | stearoyl-Coenzyme A desaturase 1 [Source:MGI Symbol;Acc:MGI:98239]                                | P13516;Q3UXG5;Q547C4;P13011;Q99PL7;Q8BNZ5;Q6T707;Q8C FY4                     |
| 455 | <b>Ubn2</b>      | 1.99   | 0.49   | 0.24 | 0.00 | ubiquitin 2 [Source:MGI Symbol;Acc:MGI:2444236]                                                   | ubiquitin 2 [Source:MGI Symbol;Acc:MGI:2444236]                                                   | Q80WC1;F6TB64;F6UTU1                                                         |
| 456 | <b>Foxo3</b>     | 1.40   | 0.34   | 0.24 | 0.01 | forkhead box O3 [Source:MGI Symbol;Acc:MGI:1890081]                                               | forkhead box O3 [Source:MGI Symbol;Acc:MGI:1890081]                                               | Q9WVH4;H3BKE2;H9KUZ0;Q3TX10                                                  |
| 457 | <b>Zfhx4</b>     | 1.38   | 0.33   | 0.24 | 0.00 | zinc finger homeodomain 4 [Source:MGI Symbol;Acc:MGI:2137668]                                     | zinc finger homeodomain 4 [Source:MGI Symbol;Acc:MGI:2137668]                                     | Q9JJN2;E9Q5A7;H3BLK8;Q6P8L4;Q8C4P4;Q8C8T0;V9GXP5                             |

|     |                |       |      |      |      |                                                                                     |                                                                                     |                                                                                                           |
|-----|----------------|-------|------|------|------|-------------------------------------------------------------------------------------|-------------------------------------------------------------------------------------|-----------------------------------------------------------------------------------------------------------|
| 458 | <b>Ttc28</b>   | 7.71  | 1.82 | 0.24 | 0.01 | tetratricopeptide repeat domain 28 [Source:MGI Symbol;Acc:MGI:2140873]              | tetratricopeptide repeat domain 28 [Source:MGI Symbol;Acc:MGI:2140873]              | Q80XJ3;A0A0A0MQN9;Q3TA11;Q99LR2                                                                           |
| 459 | <b>Tmem245</b> | 3.79  | 0.88 | 0.23 | 0.00 | transmembrane protein 245 [Source:MGI Symbol;Acc:MGI:2445107]                       | transmembrane protein 245 [Source:MGI Symbol;Acc:MGI:2445107]                       | B1AZA5;B1AZA8;D3YWD3;Q8C3N3                                                                               |
| 460 | <b>Tnrc6b</b>  | 4.57  | 1.04 | 0.23 | 0.00 | trinucleotide repeat containing 6b [Source:MGI Symbol;Acc:MGI:2443730]              | trinucleotide repeat containing 6b [Source:MGI Symbol;Acc:MGI:2443730]              | Q8BKI2;A0A2I3BPE5;A0A2I3BRG1;Q148P0;Q1LZM4;Q3TRH0;Q3TRK2;Q3U140;Q66JU9;Q8BWL0;Q8BX83;Q8BXV9;Q8BZH2;Q8VD67 |
| 461 | <b>Deptor</b>  | 12.06 | 2.65 | 0.22 | 0.00 | DEP domain containing MTOR-interacting protein [Source:MGI Symbol;Acc:MGI:2146322]  | DEP domain containing MTOR-interacting protein [Source:MGI Symbol;Acc:MGI:2146322]  | Q570Y9;A0A2I3BRE1;B2ZRS3;B2ZRS5;B2ZRS7                                                                    |
| 462 | <b>Ankrd52</b> | 10.44 | 2.24 | 0.21 | 0.01 | ankyrin repeat domain 52 [Source:MGI Symbol;Acc:MGI:2444029]                        | ankyrin repeat domain 52 [Source:MGI Symbol;Acc:MGI:2444029]                        | Q8BTI7;F7BT68;Q3UNT7;Q8C036                                                                               |
| 463 | <b>Sik1</b>    | 14.29 | 3.06 | 0.21 | 0.00 | salt inducible kinase 1 [Source:MGI Symbol;Acc:MGI:104754]                          | salt inducible kinase 1 [Source:MGI Symbol;Acc:MGI:104754]                          | Q60670;Q571I6;Q8C313                                                                                      |
| 464 | <b>Cbl</b>     | 1.51  | 0.32 | 0.21 | 0.01 | Casitas B-lineage lymphoma [Source:MGI Symbol;Acc:MGI:88279]                        | Casitas B-lineage lymphoma [Source:MGI Symbol;Acc:MGI:88279]                        | P22682;A0A0U1RNF1;A0A0U1RP17;A0A0U1RP47;A0A0U1RP95;A0A0U1RQ85;A0A0X1KG61;B1NE42                           |
| 465 | <b>Dusp8</b>   | 2.39  | 0.50 | 0.21 | 0.00 | dual specificity phosphatase 8 [Source:MGI Symbol;Acc:MGI:106626]                   | dual specificity phosphatase 8 [Source:MGI Symbol;Acc:MGI:106626]                   | O09112;B7ZC52;Q7TSZ9;Q9D3I1                                                                               |
| 466 | <b>Nr4a1</b>   | 8.58  | 1.78 | 0.21 | 0.01 | nuclear receptor subfamily 4, group A, member 1 [Source:MGI Symbol;Acc:MGI:1352454] | nuclear receptor subfamily 4, group A, member 1 [Source:MGI Symbol;Acc:MGI:1352454] | P12813;A0A2R8VJZ1;Q545Q1                                                                                  |
| 467 | <b>Soga1</b>   | 7.14  | 1.46 | 0.20 | 0.00 | suppressor of glucose, autophagy associated 1 [Source:MGI Symbol;Acc:MGI:2444575]   | suppressor of glucose, autophagy associated 1 [Source:MGI Symbol;Acc:MGI:2444575]   | E1U8D0;A2ACV6;Q69ZW6;Q8CBB8;Q8CD47                                                                        |
| 468 | <b>Atxn1</b>   | 1.77  | 0.33 | 0.19 | 0.00 | ataxin 1 [Source:MGI Symbol;Acc:MGI:104783]                                         | ataxin 1 [Source:MGI Symbol;Acc:MGI:104783]                                         | P54254;J3QPR1;Q3U2W8                                                                                      |
| 469 | <b>Hipk2</b>   | 10.23 | 1.92 | 0.19 | 0.00 | homeodomain interacting protein kinase 2 [Source:MGI Symbol;Acc:MGI:1314872]        | homeodomain interacting protein kinase 2 [Source:MGI Symbol;Acc:MGI:1314872]        | Q9QZR5;A0A0R4J202;A0A0R4J204;Q5D0E9                                                                       |
| 470 | <b>Gm32584</b> | 7.05  | 1.30 | 0.18 | 0.00 | predicted gene 32584 [Source:MGI Symbol;Acc:MGI:5591743]                            | predicted gene 32584 [Source:MGI Symbol;Acc:MGI:5591743]                            |                                                                                                           |

|     |                |       |      |      |      |                                                                                         |                                                                                         |                                                          |
|-----|----------------|-------|------|------|------|-----------------------------------------------------------------------------------------|-----------------------------------------------------------------------------------------|----------------------------------------------------------|
| 471 | <b>Nfix</b>    | 20.70 | 3.28 | 0.16 | 0.00 | nuclear factor I/X [Source:MGI<br>Symbol;Acc:MGI:97311]                                 | nuclear factor I/X [Source:MGI<br>Symbol;Acc:MGI:97311]                                 | P70257;D3YZ00;E9PUH7;Q3TYK3;Q5CZY4                       |
| 472 | <b>Irs2</b>    | 2.72  | 0.42 | 0.16 | 0.00 | insulin receptor substrate 2<br>[Source:MGI<br>Symbol;Acc:MGI:109334]                   | insulin receptor substrate 2<br>[Source:MGI<br>Symbol;Acc:MGI:109334]                   | P81122;Q3U2I0                                            |
| 473 | <b>Ino80d</b>  | 2.36  | 0.33 | 0.14 | 0.00 | INO80 complex subunit D<br>[Source:MGI<br>Symbol;Acc:MGI:3027003]                       | INO80 complex subunit D<br>[Source:MGI<br>Symbol;Acc:MGI:3027003]                       | Q66JY2;B1AT32;B1AT33;B1AT34;E9Q9Q0                       |
| 474 | <b>Gdf15</b>   | 5.44  | 0.73 | 0.13 | 0.00 | growth differentiation factor<br>15 [Source:MGI<br>Symbol;Acc:MGI:1346047]              | growth differentiation factor 15<br>[Source:MGI<br>Symbol;Acc:MGI:1346047]              | Q9Z0J7;Q3TU76;Q3UNI4                                     |
| 475 | <b>Wipf2</b>   | 2.55  | 0.33 | 0.13 | 0.04 | WAS/WASL interacting protein<br>family, member 2 [Source:MGI<br>Symbol;Acc:MGI:1924462] | WAS/WASL interacting protein<br>family, member 2 [Source:MGI<br>Symbol;Acc:MGI:1924462] | Q6PEV3;D3Z0K7                                            |
| 476 | <b>Zbtb16</b>  | 4.25  | 0.52 | 0.12 | 0.00 | zinc finger and BTB domain<br>containing 16 [Source:MGI<br>Symbol;Acc:MGI:103222]       | zinc finger and BTB domain<br>containing 16 [Source:MGI<br>Symbol;Acc:MGI:103222]       | A3KMN0;Q3UQ17                                            |
| 477 | <b>Palm2</b>   | 4.35  | 0.52 | 0.12 | 0.00 | paralemmin 2 [Source:MGI<br>Symbol;Acc:MGI:1934601]                                     | paralemmin 2 [Source:MGI<br>Symbol;Acc:MGI:1934601]                                     | Q8BR92                                                   |
| 478 | <b>Zfhx3</b>   | 3.06  | 0.36 | 0.12 | 0.00 | zinc finger homeobox 3<br>[Source:MGI<br>Symbol;Acc:MGI:99948]                          | zinc finger homeobox 3<br>[Source:MGI<br>Symbol;Acc:MGI:99948]                          | Q61329;A0A087WQ36;E9QMD3;Q5DTG5;Q63ZY0;Q6P9K2;Q9CT<br>R5 |
| 479 | <b>Gm42383</b> | 25.69 | 0.71 | 0.03 | 0.05 | predicted gene<br>42383[Source:MGI<br>Symbol;Acc:MGI:5625268 ]                          | predicted gene<br>42383[Source:MGI<br>Symbol;Acc:MGI:5625268 ]                          |                                                          |
